# Supplementary material for: De novo transcriptome sequencing and assembly from apomictic and sexual Eragrostis curvula genotypes
Source: PLoS One. 2017 Nov 1;12(11):e0185595. doi: 10.1371/journal.pone.0185595 (PMC5665505; doi:10.1371/journal.pone.0185595)
Supplement: S2 Table — (XLS) [file pone.0185595.s004.xls]

## Sheet: Sheet1
isotig	Isogroup	Length	NR Hit ID	NR Hit Description
contig00007	isogroup00001	1301	ref|XP_003558298.1|	PREDICTED: splicing factor 3A subunit 2-like [Brachypodium distachyon]
contig00017	isogroup00001	1025	gb|ABH08755.1|	ubiquitin [Arabidopsis thaliana]
contig00168	isogroup00001	668	ref|NP_001136643.1|	uncharacterized protein LOC100216772 [Zea mays] gb|ACF82327.1| unknown [Zea mays]
contig00173	isogroup00001	657	gb|ABC66105.1|	putative pentameric polyubiquitin [Zinnia violacea]
contig00362	isogroup00001	621	gb|AFW66446.1|	ubiquitin2 [Zea mays] gb|AFW70220.1| polyubiquitin-like protein [Zea mays]
contig00363	isogroup00002	1165	ref|XP_002452879.1|	hypothetical protein SORBIDRAFT_04g034120 [Sorghum bicolor] gb|EES05855.1| hypothetical protein SORBIDRAFT_04g034120 [Sorghum bicolor]
contig00461	isogroup00002	1247	emb|CAA30152.1|	GADPH (383 AA) [Zea mays]
contig00603	isogroup00003	539	gb|AFW77598.1|	putative translation elongation factor Tu family protein [Zea mays]
contig00643	isogroup00004	514
contig00646	isogroup00004	936	ref|XP_002461958.1|	hypothetical protein SORBIDRAFT_02g011205 [Sorghum bicolor] gb|EER98479.1| hypothetical protein SORBIDRAFT_02g011205 [Sorghum bicolor]
contig00648	isogroup00004	1936	ref|XP_002459191.1|	hypothetical protein SORBIDRAFT_02g000250 [Sorghum bicolor] gb|EER95712.1| hypothetical protein SORBIDRAFT_02g000250 [Sorghum bicolor]
contig00653	isogroup00004	639	gb|ACR36375.1|	unknown [Zea mays]
contig00674	isogroup00004	1079	ref|NP_001149997.1|	LOC100283624 [Zea mays] gb|ACG37439.1| lymphoid organ expressed yellow head virus receptor protein [Zea mays]
contig00676	isogroup00004	754	ref|XP_002452667.1|	hypothetical protein SORBIDRAFT_04g030280 [Sorghum bicolor] gb|EES05643.1| hypothetical protein SORBIDRAFT_04g030280 [Sorghum bicolor]
contig00688	isogroup00004	819
contig00704	isogroup00005	733	emb|CAD45027.1|	NBS-LRR disease resistance protein homologue [Hordeum vulgare]
contig00706	isogroup00005	5017	ref|XP_002460003.1|	hypothetical protein SORBIDRAFT_02g020710 [Sorghum bicolor] gb|EER96524.1| hypothetical protein SORBIDRAFT_02g020710 [Sorghum bicolor]
contig00711	isogroup00005	825	ref|XP_002460003.1|	hypothetical protein SORBIDRAFT_02g020710 [Sorghum bicolor] gb|EER96524.1| hypothetical protein SORBIDRAFT_02g020710 [Sorghum bicolor]
contig00729	isogroup00005	765
contig00732	isogroup00005	1865	ref|XP_002460003.1|	hypothetical protein SORBIDRAFT_02g020710 [Sorghum bicolor] gb|EER96524.1| hypothetical protein SORBIDRAFT_02g020710 [Sorghum bicolor]
contig00734	isogroup00005	1185
contig00736	isogroup00005	662
contig00738	isogroup00005	526
contig00740	isogroup00005	507
contig00750	isogroup00005	519
contig00757	isogroup00005	558	ref|XP_002443539.1|	hypothetical protein SORBIDRAFT_08g021240 [Sorghum bicolor] gb|EES17377.1| hypothetical protein SORBIDRAFT_08g021240 [Sorghum bicolor]
contig00763	isogroup00005	516	ref|XP_002460003.1|	hypothetical protein SORBIDRAFT_02g020710 [Sorghum bicolor] gb|EER96524.1| hypothetical protein SORBIDRAFT_02g020710 [Sorghum bicolor]
contig00765	isogroup00005	723	emb|CAD45027.1|	NBS-LRR disease resistance protein homologue [Hordeum vulgare]
contig00766	isogroup00006	852	gb|AFW63064.1|	hypothetical protein ZEAMMB73_169420 [Zea mays] gb|AFW63065.1| hypothetical protein ZEAMMB73_169420 [Zea mays]
contig00772	isogroup00006	598	gb|AFW63064.1|	hypothetical protein ZEAMMB73_169420 [Zea mays] gb|AFW63065.1| hypothetical protein ZEAMMB73_169420 [Zea mays]
contig00778	isogroup00006	522	gb|ACN29009.1|	unknown [Zea mays]
contig00782	isogroup00006	1239	ref|XP_002448194.1|	hypothetical protein SORBIDRAFT_06g022750 [Sorghum bicolor] gb|EES12522.1| hypothetical protein SORBIDRAFT_06g022750 [Sorghum bicolor]
contig00783	isogroup00006	1019	ref|NP_001053326.1|	Os04g0518400 [Oryza sativa Japonica Group] emb|CAE05623.1| OSJNBb0061C13.5 [Oryza sativa Japonica Group] emb|CAE05458.3| OSJNBa0073E02.18 [Oryza sativa Japonica Group] dbj|BAF15240.1| Os04g0518400 [Oryza sativa Japonica Group] emb|CAH67232.1| OSIGBa0145M07.14 [Oryza sativa Indica Group] emb|CAH67323.1| OSIGBa0102I15.3 [Oryza sativa Indica Group] gb|EAY94863.1| hypothetical protein OsI_16660 [Oryz…
contig00792	isogroup00006	1256	gb|AFW63064.1|	hypothetical protein ZEAMMB73_169420 [Zea mays] gb|AFW63065.1| hypothetical protein ZEAMMB73_169420 [Zea mays]
contig00799	isogroup00006	765	tpg|DAA36918.1|	TPA: phenylalanine ammonia-lyase [Zea mays]
contig00803	isogroup00006	926	ref|NP_001053326.1|	Os04g0518400 [Oryza sativa Japonica Group] emb|CAE05623.1| OSJNBb0061C13.5 [Oryza sativa Japonica Group] emb|CAE05458.3| OSJNBa0073E02.18 [Oryza sativa Japonica Group] dbj|BAF15240.1| Os04g0518400 [Oryza sativa Japonica Group] emb|CAH67232.1| OSIGBa0145M07.14 [Oryza sativa Indica Group] emb|CAH67323.1| OSIGBa0102I15.3 [Oryza sativa Indica Group] gb|EAY94863.1| hypothetical protein OsI_16660 [Oryz…
contig00804	isogroup00006	646	ref|XP_002448193.1|	hypothetical protein SORBIDRAFT_06g022740 [Sorghum bicolor] gb|EES12521.1| hypothetical protein SORBIDRAFT_06g022740 [Sorghum bicolor]
contig00807	isogroup00006	528	tpg|DAA36918.1|	TPA: phenylalanine ammonia-lyase [Zea mays]
contig00808	isogroup00006	931	tpg|DAA36918.1|	TPA: phenylalanine ammonia-lyase [Zea mays]
contig00816	isogroup00006	615	gb|AFW63064.1|	hypothetical protein ZEAMMB73_169420 [Zea mays] gb|AFW63065.1| hypothetical protein ZEAMMB73_169420 [Zea mays]
contig00826	isogroup00007	630	gb|AAP80650.1|AF475129_1	elongation factor, partial [Triticum aestivum]
contig00828	isogroup00007	1069	ref|XP_002456335.1|	hypothetical protein SORBIDRAFT_03g034200 [Sorghum bicolor] gb|EES01455.1| hypothetical protein SORBIDRAFT_03g034200 [Sorghum bicolor]
contig00831	isogroup00007	999	ref|NP_001140578.1|	uncharacterized protein LOC100272648 [Zea mays] gb|ACF84111.1| unknown [Zea mays]
contig00834	isogroup00007	610	ref|XP_002489003.1|	hypothetical protein SORBIDRAFT_0525s002010 [Sorghum bicolor] gb|EES20505.1| hypothetical protein SORBIDRAFT_0525s002010 [Sorghum bicolor]
contig00836	isogroup00007	601	gb|AAP80650.1|AF475129_1	elongation factor, partial [Triticum aestivum]
contig00842	isogroup00007	1162	ref|XP_002456335.1|	hypothetical protein SORBIDRAFT_03g034200 [Sorghum bicolor] gb|EES01455.1| hypothetical protein SORBIDRAFT_03g034200 [Sorghum bicolor]
contig00844	isogroup00007	500	ref|XP_002489003.1|	hypothetical protein SORBIDRAFT_0525s002010 [Sorghum bicolor] gb|EES20505.1| hypothetical protein SORBIDRAFT_0525s002010 [Sorghum bicolor]
contig00847	isogroup00007	585	gb|AAP80650.1|AF475129_1	elongation factor, partial [Triticum aestivum]
contig00851	isogroup00007	1433	dbj|BAJ92215.1|	predicted protein [Hordeum vulgare subsp. vulgare]
contig00852	isogroup00007	626	ref|XP_002489003.1|	hypothetical protein SORBIDRAFT_0525s002010 [Sorghum bicolor] gb|EES20505.1| hypothetical protein SORBIDRAFT_0525s002010 [Sorghum bicolor]
contig00853	isogroup00007	633	ref|XP_002456335.1|	hypothetical protein SORBIDRAFT_03g034200 [Sorghum bicolor] gb|EES01455.1| hypothetical protein SORBIDRAFT_03g034200 [Sorghum bicolor]
contig00865	isogroup00007	716	ref|NP_001140578.1|	uncharacterized protein LOC100272648 [Zea mays] gb|ACF84111.1| unknown [Zea mays]
contig00878	isogroup00008	1207	ref|NP_001050259.1|	Os03g0387100 [Oryza sativa Japonica Group] sp|Q10KF0.1|PSA2_ORYSJ RecName: Full=Proteasome subunit alpha type-2; AltName: Full=20S proteasome alpha subunit B; AltName: Full=20S proteasome subunit alpha-2 sp|A2YVR7.2|PSA2_ORYSI RecName: Full=Proteasome subunit alpha type-2; AltName: Full=20S proteasome alpha subunit B; AltName: Full=20S proteasome subunit alpha-2 dbj|BAA96830.1| alpha 2 subunit of…
contig00898	isogroup00008	721	gb|AAS46110.1|	photosystem II M protein [Oryza sativa Japonica Group] gb|AAS46173.1| photosystem II M protein [Oryza sativa Japonica Group] gb|ADD62823.1| photosystem II protein M [Oryza sativa Japonica Group] gb|ADD62891.1| photosystem II protein M [Oryza meridionalis] gb|ADD62959.1| photosystem II protein M [Oryza australiensis]
contig00912	isogroup00009	821	gb|AFI60242.1|	light harvesting chlorophyll a/b binding protein, partial [Panicum virgatum]
contig00929	isogroup00009	559	gb|AFI60242.1|	light harvesting chlorophyll a/b binding protein, partial [Panicum virgatum]
contig00931	isogroup00009	1829	gb|EEC69640.1|	hypothetical protein OsI_39038 [Oryza sativa Indica Group]
contig00942	isogroup00009	528	ref|XP_002460622.1|	hypothetical protein SORBIDRAFT_02g032040 [Sorghum bicolor] gb|EER97143.1| hypothetical protein SORBIDRAFT_02g032040 [Sorghum bicolor]
contig00963	isogroup00010	692	ref|NP_001066607.1|	Os12g0292400 [Oryza sativa Japonica Group] gb|ABA97179.1| Ribulose bisphosphate carboxylase small chain C, chloroplast precursor, putative, expressed [Oryza sativa Japonica Group] gb|ABA97180.1| Ribulose bisphosphate carboxylase small chain C, chloroplast precursor, putative, expressed [Oryza sativa Japonica Group] dbj|BAF29626.1| Os12g0292400 [Oryza sativa Japonica Group] gb|EAZ20216.1| hypothet…
contig00986	isogroup00010	792	ref|NP_001066607.1|	Os12g0292400 [Oryza sativa Japonica Group] gb|ABA97179.1| Ribulose bisphosphate carboxylase small chain C, chloroplast precursor, putative, expressed [Oryza sativa Japonica Group] gb|ABA97180.1| Ribulose bisphosphate carboxylase small chain C, chloroplast precursor, putative, expressed [Oryza sativa Japonica Group] dbj|BAF29626.1| Os12g0292400 [Oryza sativa Japonica Group] gb|EAZ20216.1| hypothet…
contig01002	isogroup00011	598	dbj|BAK05950.1|	predicted protein [Hordeum vulgare subsp. vulgare]
contig01004	isogroup00011	2142	ref|XP_003577419.1|	PREDICTED: uncharacterized protein LOC100827416 [Brachypodium distachyon]
contig01005	isogroup00011	528	gb|EEC68431.1|	hypothetical protein OsI_36621 [Oryza sativa Indica Group]
contig01008	isogroup00011	638	tpg|DAA42215.1|	TPA: hypothetical protein ZEAMMB73_104670 [Zea mays]
contig01064	isogroup00012	550	emb|CAN61453.1|	hypothetical protein VITISV_029791 [Vitis vinifera]
contig01119	isogroup00014	1567	ref|XP_002443890.1|	hypothetical protein SORBIDRAFT_07g003870 [Sorghum bicolor] gb|EES13385.1| hypothetical protein SORBIDRAFT_07g003870 [Sorghum bicolor]
contig01125	isogroup00014	821	ref|XP_002443890.1|	hypothetical protein SORBIDRAFT_07g003870 [Sorghum bicolor] gb|EES13385.1| hypothetical protein SORBIDRAFT_07g003870 [Sorghum bicolor]
contig01134	isogroup00014	827
contig01135	isogroup00014	563
contig01138	isogroup00014	617	gb|ADU60099.1|	circadian clock associated protein 1 [Zea mays]
contig01139	isogroup00014	614	gb|ADU60099.1|	circadian clock associated protein 1 [Zea mays]
contig01161	isogroup00015	524	ref|XP_002441135.1|	hypothetical protein SORBIDRAFT_09g021080 [Sorghum bicolor] gb|EES19565.1| hypothetical protein SORBIDRAFT_09g021080 [Sorghum bicolor]
contig01253	isogroup00018	1474	ref|XP_002442655.1|	hypothetical protein SORBIDRAFT_08g000540 [Sorghum bicolor] gb|EES16493.1| hypothetical protein SORBIDRAFT_08g000540 [Sorghum bicolor]
contig01256	isogroup00018	981	gb|AFW64560.1|	hypothetical protein ZEAMMB73_178480 [Zea mays] gb|AFW64561.1| hypothetical protein ZEAMMB73_178480 [Zea mays]
contig01258	isogroup00018	700	ref|NP_001065539.1|	Os11g0106400 [Oryza sativa Japonica Group] gb|ABA91080.1| Ubiquitin-activating enzyme E1 2, putative, expressed [Oryza sativa Japonica Group] gb|ABA91081.1| Ubiquitin-activating enzyme E1 2, putative, expressed [Oryza sativa Japonica Group] dbj|BAF27384.1| Os11g0106400 [Oryza sativa Japonica Group]
contig01261	isogroup00018	748	ref|NP_001065539.1|	Os11g0106400 [Oryza sativa Japonica Group] gb|ABA91080.1| Ubiquitin-activating enzyme E1 2, putative, expressed [Oryza sativa Japonica Group] gb|ABA91081.1| Ubiquitin-activating enzyme E1 2, putative, expressed [Oryza sativa Japonica Group] dbj|BAF27384.1| Os11g0106400 [Oryza sativa Japonica Group]
contig01267	isogroup00018	606	gb|AFW64560.1|	hypothetical protein ZEAMMB73_178480 [Zea mays] gb|AFW64561.1| hypothetical protein ZEAMMB73_178480 [Zea mays]
contig01275	isogroup00018	775	ref|NP_001145948.1|	uncharacterized protein LOC100279472 [Zea mays] gb|ACL52913.1| unknown [Zea mays]
contig01282	isogroup00018	1197	ref|XP_002442655.1|	hypothetical protein SORBIDRAFT_08g000540 [Sorghum bicolor] gb|EES16493.1| hypothetical protein SORBIDRAFT_08g000540 [Sorghum bicolor]
contig01356	isogroup00021	907	dbj|BAK06287.1|	predicted protein [Hordeum vulgare subsp. vulgare]
contig01357	isogroup00021	658	dbj|BAK06287.1|	predicted protein [Hordeum vulgare subsp. vulgare]
contig01360	isogroup00021	1038	dbj|BAK06287.1|	predicted protein [Hordeum vulgare subsp. vulgare]
contig01363	isogroup00021	884	dbj|BAK06287.1|	predicted protein [Hordeum vulgare subsp. vulgare]
contig01366	isogroup00021	637	dbj|BAK06287.1|	predicted protein [Hordeum vulgare subsp. vulgare]
contig01373	isogroup00021	581	dbj|BAK06287.1|	predicted protein [Hordeum vulgare subsp. vulgare]
contig01438	isogroup00024	815	tpg|DAA54971.1|	TPA: hypothetical protein ZEAMMB73_123610 [Zea mays]
contig01439	isogroup00024	594	gb|EEC69178.1|	hypothetical protein OsI_38149 [Oryza sativa Indica Group]
contig01441	isogroup00024	624	ref|XP_002443156.1|	hypothetical protein SORBIDRAFT_08g012560 [Sorghum bicolor] gb|EES16994.1| hypothetical protein SORBIDRAFT_08g012560 [Sorghum bicolor]
contig01442	isogroup00024	624	ref|XP_002443156.1|	hypothetical protein SORBIDRAFT_08g012560 [Sorghum bicolor] gb|EES16994.1| hypothetical protein SORBIDRAFT_08g012560 [Sorghum bicolor]
contig01443	isogroup00024	1194	ref|XP_003575554.1|	PREDICTED: E3 ubiquitin-protein ligase UPL1-like [Brachypodium distachyon]
contig01444	isogroup00024	502	gb|EEC69178.1|	hypothetical protein OsI_38149 [Oryza sativa Indica Group]
contig01446	isogroup00024	813	gb|EEE53127.1|	hypothetical protein OsJ_35924 [Oryza sativa Japonica Group]
contig01449	isogroup00024	980	gb|EEC69178.1|	hypothetical protein OsI_38149 [Oryza sativa Indica Group]
contig01450	isogroup00024	980	gb|EEC69178.1|	hypothetical protein OsI_38149 [Oryza sativa Indica Group]
contig01451	isogroup00024	989	ref|XP_003575554.1|	PREDICTED: E3 ubiquitin-protein ligase UPL1-like [Brachypodium distachyon]
contig01453	isogroup00024	1177	ref|XP_003575554.1|	PREDICTED: E3 ubiquitin-protein ligase UPL1-like [Brachypodium distachyon]
contig01454	isogroup00024	1168	tpg|DAA54973.1|	TPA: hypothetical protein ZEAMMB73_123610 [Zea mays]
contig01455	isogroup00024	584	ref|NP_001066671.2|	Os12g0428600 [Oryza sativa Japonica Group] dbj|BAF29690.2| Os12g0428600, partial [Oryza sativa Japonica Group]
contig01458	isogroup00024	553	gb|EEE53127.1|	hypothetical protein OsJ_35924 [Oryza sativa Japonica Group]
contig01459	isogroup00024	606	ref|NP_001066671.2|	Os12g0428600 [Oryza sativa Japonica Group] dbj|BAF29690.2| Os12g0428600, partial [Oryza sativa Japonica Group]
contig01460	isogroup00024	740	gb|ABA97973.2|	E3 ubiquitin protein ligase UPL1, putative, expressed [Oryza sativa Japonica Group]
contig01461	isogroup00024	952	ref|NP_001170313.1|	uncharacterized protein LOC100384278 [Zea mays] gb|ACN36572.1| unknown [Zea mays]
contig01464	isogroup00024	519	gb|EEC69178.1|	hypothetical protein OsI_38149 [Oryza sativa Indica Group]
contig01465	isogroup00024	607	ref|NP_001066671.2|	Os12g0428600 [Oryza sativa Japonica Group] dbj|BAF29690.2| Os12g0428600, partial [Oryza sativa Japonica Group]
contig01468	isogroup00025	611	ref|XP_002442336.1|	hypothetical protein SORBIDRAFT_08g018470 [Sorghum bicolor] gb|EES16174.1| hypothetical protein SORBIDRAFT_08g018470 [Sorghum bicolor]
contig01472	isogroup00025	787	ref|XP_002442336.1|	hypothetical protein SORBIDRAFT_08g018470 [Sorghum bicolor] gb|EES16174.1| hypothetical protein SORBIDRAFT_08g018470 [Sorghum bicolor]
contig01477	isogroup00025	1222	tpg|DAA47039.1|	TPA: hypothetical protein ZEAMMB73_026550 [Zea mays]
contig01480	isogroup00025	585	tpg|DAA47039.1|	TPA: hypothetical protein ZEAMMB73_026550 [Zea mays]
contig01481	isogroup00025	585	tpg|DAA47039.1|	TPA: hypothetical protein ZEAMMB73_026550 [Zea mays]
contig01486	isogroup00025	574	ref|XP_002442336.1|	hypothetical protein SORBIDRAFT_08g018470 [Sorghum bicolor] gb|EES16174.1| hypothetical protein SORBIDRAFT_08g018470 [Sorghum bicolor]
contig01492	isogroup00025	814	ref|XP_002442336.1|	hypothetical protein SORBIDRAFT_08g018470 [Sorghum bicolor] gb|EES16174.1| hypothetical protein SORBIDRAFT_08g018470 [Sorghum bicolor]
contig01553	isogroup00028	836	ref|XP_002448862.1|	hypothetical protein SORBIDRAFT_05g000450 [Sorghum bicolor] gb|EES07850.1| hypothetical protein SORBIDRAFT_05g000450 [Sorghum bicolor]
contig01561	isogroup00028	969	ref|XP_003576374.1|	PREDICTED: clathrin heavy chain 1-like [Brachypodium distachyon]
contig01564	isogroup00028	604	gb|EEC68683.1|	hypothetical protein OsI_37138 [Oryza sativa Indica Group]
contig01565	isogroup00028	667	tpg|DAA62147.1|	TPA: putative clathrin heavy chain family protein, partial [Zea mays]
contig01567	isogroup00028	667	tpg|DAA62147.1|	TPA: putative clathrin heavy chain family protein, partial [Zea mays]
contig01568	isogroup00028	697	ref|NP_001065928.1|	Os12g0104800 [Oryza sativa Japonica Group] dbj|BAF28947.1| Os12g0104800, partial [Oryza sativa Japonica Group]
contig01569	isogroup00028	836	ref|XP_002448862.1|	hypothetical protein SORBIDRAFT_05g000450 [Sorghum bicolor] gb|EES07850.1| hypothetical protein SORBIDRAFT_05g000450 [Sorghum bicolor]
contig01573	isogroup00028	1275	gb|AFW55790.1|	putative clathrin heavy chain family protein [Zea mays]
contig02008	isogroup00046	1382	ref|XP_002444042.1|	hypothetical protein SORBIDRAFT_07g006300 [Sorghum bicolor] gb|EES13537.1| hypothetical protein SORBIDRAFT_07g006300 [Sorghum bicolor]
contig02023	isogroup00046	731	ref|XP_002444042.1|	hypothetical protein SORBIDRAFT_07g006300 [Sorghum bicolor] gb|EES13537.1| hypothetical protein SORBIDRAFT_07g006300 [Sorghum bicolor]
contig02025	isogroup00046	810	ref|XP_002444042.1|	hypothetical protein SORBIDRAFT_07g006300 [Sorghum bicolor] gb|EES13537.1| hypothetical protein SORBIDRAFT_07g006300 [Sorghum bicolor]
contig02026	isogroup00046	925	ref|XP_002444042.1|	hypothetical protein SORBIDRAFT_07g006300 [Sorghum bicolor] gb|EES13537.1| hypothetical protein SORBIDRAFT_07g006300 [Sorghum bicolor]
contig02042	isogroup00047	627	tpg|DAA35711.1|	TPA: hypothetical protein ZEAMMB73_063180 [Zea mays]
contig02214	isogroup00055	571	tpg|DAA53191.1|	TPA: hypothetical protein ZEAMMB73_111490 [Zea mays]
contig02215	isogroup00055	508	tpg|DAA53191.1|	TPA: hypothetical protein ZEAMMB73_111490 [Zea mays]
contig02216	isogroup00055	508	tpg|DAA53191.1|	TPA: hypothetical protein ZEAMMB73_111490 [Zea mays]
contig02224	isogroup00055	769	ref|XP_002455081.1|	hypothetical protein SORBIDRAFT_03g004010 [Sorghum bicolor] gb|EES00201.1| hypothetical protein SORBIDRAFT_03g004010 [Sorghum bicolor]
contig02225	isogroup00055	769	ref|XP_002455081.1|	hypothetical protein SORBIDRAFT_03g004010 [Sorghum bicolor] gb|EES00201.1| hypothetical protein SORBIDRAFT_03g004010 [Sorghum bicolor]
contig02229	isogroup00055	746	tpg|DAA53191.1|	TPA: hypothetical protein ZEAMMB73_111490 [Zea mays]
contig02233	isogroup00055	822	tpg|DAA53191.1|	TPA: hypothetical protein ZEAMMB73_111490 [Zea mays]
contig10112	isogroup00651	925	ref|XP_002448650.1|	hypothetical protein SORBIDRAFT_06g030810 [Sorghum bicolor] gb|EES12978.1| hypothetical protein SORBIDRAFT_06g030810 [Sorghum bicolor]
contig12174	isogroup00868	621	ref|XP_002454244.1|	hypothetical protein SORBIDRAFT_04g027440 [Sorghum bicolor] gb|EES07220.1| hypothetical protein SORBIDRAFT_04g027440 [Sorghum bicolor]
contig14002	isogroup01077	700
contig19572	isogroup01831	723	ref|NP_001043738.1|	Os01g0652600 [Oryza sativa Japonica Group] dbj|BAD68706.1| putative ketol-acid reductoisomerase precursor [Oryza sativa Japonica Group] dbj|BAF05652.1| Os01g0652600 [Oryza sativa Japonica Group]
contig23911	isogroup02548	509	ref|XP_002458251.1|	hypothetical protein SORBIDRAFT_03g029930 [Sorghum bicolor] gb|EES03371.1| hypothetical protein SORBIDRAFT_03g029930 [Sorghum bicolor]
contig28825	isogroup03528	1812	sp|Q8H8N3.1|TYW1_ORYSJ	RecName: Full=tRNA wybutosine-synthesizing protein 1 homolog gb|AAN65027.1| putative oxidoreductase [Oryza sativa Japonica Group] gb|ABF99122.1| radical S-adenosyl methionine and flavodoxin domains 1, isoform 1, putative, expressed [Oryza sativa Japonica Group] gb|EAY92018.1| hypothetical protein OsI_13711 [Oryza sativa Indica Group]
contig28826	isogroup03529	623
contig28830	isogroup03530	532	tpg|DAA56411.1|	TPA: putative alcohol dehydrogenase superfamily protein [Zea mays]
contig47954	isogroup09410	1104	gb|EEC74030.1|	hypothetical protein OsI_08983 [Oryza sativa Indica Group]
contig47956	isogroup09411	723	ref|NP_001062661.1|	Os09g0246700 [Oryza sativa Japonica Group] dbj|BAF24575.1| Os09g0246700 [Oryza sativa Japonica Group]
contig47957	isogroup09411	730	dbj|BAK02437.1|	predicted protein [Hordeum vulgare subsp. vulgare] dbj|BAJ98830.1| predicted protein [Hordeum vulgare subsp. vulgare]
contig47959	isogroup09412	1304	gb|ACG39865.1|	starch binding domain containing protein [Zea mays]
contig47960	isogroup09413	986	ref|NP_001105026.1|	aquaporin PIP2-4 [Zea mays] sp|Q9ATM6.1|PIP24_MAIZE RecName: Full=Aquaporin PIP2-4; AltName: Full=Plasma membrane intrinsic protein 2-4; AltName: Full=ZmPIP2-4; AltName: Full=ZmPIP2;4 gb|AAK26761.1| plasma membrane integral protein ZmPIP2-4 [Zea mays] gb|ACN28082.1| unknown [Zea mays] gb|AFW72774.1| plasma membrane intrinsic protein2 [Zea mays]
contig47962	isogroup09414	571	gb|AAQ56349.1|	putative CBS domain containing protein [Oryza sativa Japonica Group]
contig47964	isogroup09415	640	ref|NP_001147911.1|	ATP-dependent RNA helicase DDX23 [Zea mays] gb|ACG29092.1| ATP-dependent RNA helicase DDX23 [Zea mays]
contig47970	isogroup09418	563	gb|AFW87760.1|	putative ubiquitin carboxyl-terminal hydrolase superfamily protein [Zea mays]
isotig00001	isogroup00008	4295	ref|YP_003208174.1|	photosystem II CP43 chlorophyll apoprotein [Coix lacryma-jobi] gb|ACI43233.1| photosystem II CP43 chlorophyll apoprotein [Coix lacryma-jobi]
isotig00002	isogroup00008	1379	ref|XP_002467485.1|	hypothetical protein SORBIDRAFT_01g028980 [Sorghum bicolor] gb|EER94483.1| hypothetical protein SORBIDRAFT_01g028980 [Sorghum bicolor]
isotig00003	isogroup00008	423	ref|XP_002448056.1|	hypothetical protein SORBIDRAFT_06g020310 [Sorghum bicolor] gb|EES12384.1| hypothetical protein SORBIDRAFT_06g020310 [Sorghum bicolor]
isotig00004	isogroup00013	2384	sp|A2YWQ1.1|HSP81_ORYSI	RecName: Full=Heat shock protein 81-1; Short=HSP81-1; AltName: Full=Heat shock protein 82 sp|Q0J4P2.2|HSP81_ORYSJ RecName: Full=Heat shock protein 81-1; Short=HSP81-1; AltName: Full=Heat shock protein 82 emb|CAA77978.1| heat shock protein 82 (HSP82) [Oryza sativa] dbj|BAD08818.1| heat shock protein 82 [Oryza sativa Japonica Group] dbj|BAD08897.1| heat shock protein 82 [Oryza sativa Japonica Group…
isotig00005	isogroup00013	2366	dbj|BAD73667.1|	putative heat shock protein 82 [Oryza sativa Japonica Group] dbj|BAD73668.1| putative heat shock protein 82 [Oryza sativa Japonica Group]
isotig00006	isogroup00013	2367	ref|XP_002460433.1|	hypothetical protein SORBIDRAFT_02g028050 [Sorghum bicolor] gb|EER96954.1| hypothetical protein SORBIDRAFT_02g028050 [Sorghum bicolor]
isotig00007	isogroup00013	2388	ref|XP_002460433.1|	hypothetical protein SORBIDRAFT_02g028050 [Sorghum bicolor] gb|EER96954.1| hypothetical protein SORBIDRAFT_02g028050 [Sorghum bicolor]
isotig00008	isogroup00013	2384	sp|A2YWQ1.1|HSP81_ORYSI	RecName: Full=Heat shock protein 81-1; Short=HSP81-1; AltName: Full=Heat shock protein 82 sp|Q0J4P2.2|HSP81_ORYSJ RecName: Full=Heat shock protein 81-1; Short=HSP81-1; AltName: Full=Heat shock protein 82 emb|CAA77978.1| heat shock protein 82 (HSP82) [Oryza sativa] dbj|BAD08818.1| heat shock protein 82 [Oryza sativa Japonica Group] dbj|BAD08897.1| heat shock protein 82 [Oryza sativa Japonica Group…
isotig00009	isogroup00013	2366	dbj|BAD73667.1|	putative heat shock protein 82 [Oryza sativa Japonica Group] dbj|BAD73668.1| putative heat shock protein 82 [Oryza sativa Japonica Group]
isotig00010	isogroup00013	2368	ref|XP_002460433.1|	hypothetical protein SORBIDRAFT_02g028050 [Sorghum bicolor] gb|EER96954.1| hypothetical protein SORBIDRAFT_02g028050 [Sorghum bicolor]
isotig00011	isogroup00013	2367	ref|XP_002460433.1|	hypothetical protein SORBIDRAFT_02g028050 [Sorghum bicolor] gb|EER96954.1| hypothetical protein SORBIDRAFT_02g028050 [Sorghum bicolor]
isotig00012	isogroup00013	2380	sp|A2YWQ1.1|HSP81_ORYSI	RecName: Full=Heat shock protein 81-1; Short=HSP81-1; AltName: Full=Heat shock protein 82 sp|Q0J4P2.2|HSP81_ORYSJ RecName: Full=Heat shock protein 81-1; Short=HSP81-1; AltName: Full=Heat shock protein 82 emb|CAA77978.1| heat shock protein 82 (HSP82) [Oryza sativa] dbj|BAD08818.1| heat shock protein 82 [Oryza sativa Japonica Group] dbj|BAD08897.1| heat shock protein 82 [Oryza sativa Japonica Group…
isotig00013	isogroup00013	2362	ref|XP_002444804.1|	hypothetical protein SORBIDRAFT_07g028270 [Sorghum bicolor] gb|EES14299.1| hypothetical protein SORBIDRAFT_07g028270 [Sorghum bicolor]
isotig00014	isogroup00013	2363	ref|XP_002444804.1|	hypothetical protein SORBIDRAFT_07g028270 [Sorghum bicolor] gb|EES14299.1| hypothetical protein SORBIDRAFT_07g028270 [Sorghum bicolor]
isotig00015	isogroup00013	2388	ref|XP_002460433.1|	hypothetical protein SORBIDRAFT_02g028050 [Sorghum bicolor] gb|EER96954.1| hypothetical protein SORBIDRAFT_02g028050 [Sorghum bicolor]
isotig00016	isogroup00013	2367	ref|XP_002460433.1|	hypothetical protein SORBIDRAFT_02g028050 [Sorghum bicolor] gb|EER96954.1| hypothetical protein SORBIDRAFT_02g028050 [Sorghum bicolor]
isotig00017	isogroup00013	2368	ref|XP_002460433.1|	hypothetical protein SORBIDRAFT_02g028050 [Sorghum bicolor] gb|EER96954.1| hypothetical protein SORBIDRAFT_02g028050 [Sorghum bicolor]
isotig00018	isogroup00013	2384	ref|XP_002444804.1|	hypothetical protein SORBIDRAFT_07g028270 [Sorghum bicolor] gb|EES14299.1| hypothetical protein SORBIDRAFT_07g028270 [Sorghum bicolor]
isotig00019	isogroup00013	2383	sp|A2YWQ1.1|HSP81_ORYSI	RecName: Full=Heat shock protein 81-1; Short=HSP81-1; AltName: Full=Heat shock protein 82 sp|Q0J4P2.2|HSP81_ORYSJ RecName: Full=Heat shock protein 81-1; Short=HSP81-1; AltName: Full=Heat shock protein 82 emb|CAA77978.1| heat shock protein 82 (HSP82) [Oryza sativa] dbj|BAD08818.1| heat shock protein 82 [Oryza sativa Japonica Group] dbj|BAD08897.1| heat shock protein 82 [Oryza sativa Japonica Group…
isotig00020	isogroup00013	2365	ref|XP_002444804.1|	hypothetical protein SORBIDRAFT_07g028270 [Sorghum bicolor] gb|EES14299.1| hypothetical protein SORBIDRAFT_07g028270 [Sorghum bicolor]
isotig00021	isogroup00013	2383	sp|A2YWQ1.1|HSP81_ORYSI	RecName: Full=Heat shock protein 81-1; Short=HSP81-1; AltName: Full=Heat shock protein 82 sp|Q0J4P2.2|HSP81_ORYSJ RecName: Full=Heat shock protein 81-1; Short=HSP81-1; AltName: Full=Heat shock protein 82 emb|CAA77978.1| heat shock protein 82 (HSP82) [Oryza sativa] dbj|BAD08818.1| heat shock protein 82 [Oryza sativa Japonica Group] dbj|BAD08897.1| heat shock protein 82 [Oryza sativa Japonica Group…
isotig00022	isogroup00013	2365	ref|XP_002444804.1|	hypothetical protein SORBIDRAFT_07g028270 [Sorghum bicolor] gb|EES14299.1| hypothetical protein SORBIDRAFT_07g028270 [Sorghum bicolor]
isotig00023	isogroup00013	2366	gb|ADP89125.1|	heat shock protein 90 [Cenchrus americanus] gb|ADP89126.1| heat shock protein 90 [Cenchrus americanus]
isotig00024	isogroup00013	2383	sp|A2YWQ1.1|HSP81_ORYSI	RecName: Full=Heat shock protein 81-1; Short=HSP81-1; AltName: Full=Heat shock protein 82 sp|Q0J4P2.2|HSP81_ORYSJ RecName: Full=Heat shock protein 81-1; Short=HSP81-1; AltName: Full=Heat shock protein 82 emb|CAA77978.1| heat shock protein 82 (HSP82) [Oryza sativa] dbj|BAD08818.1| heat shock protein 82 [Oryza sativa Japonica Group] dbj|BAD08897.1| heat shock protein 82 [Oryza sativa Japonica Group…
isotig00025	isogroup00013	2366	gb|ADP89125.1|	heat shock protein 90 [Cenchrus americanus] gb|ADP89126.1| heat shock protein 90 [Cenchrus americanus]
isotig00026	isogroup00013	2365	ref|XP_002444804.1|	hypothetical protein SORBIDRAFT_07g028270 [Sorghum bicolor] gb|EES14299.1| hypothetical protein SORBIDRAFT_07g028270 [Sorghum bicolor]
isotig00027	isogroup00013	2364	ref|XP_002444804.1|	hypothetical protein SORBIDRAFT_07g028270 [Sorghum bicolor] gb|EES14299.1| hypothetical protein SORBIDRAFT_07g028270 [Sorghum bicolor]
isotig00028	isogroup00013	2383	sp|A2YWQ1.1|HSP81_ORYSI	RecName: Full=Heat shock protein 81-1; Short=HSP81-1; AltName: Full=Heat shock protein 82 sp|Q0J4P2.2|HSP81_ORYSJ RecName: Full=Heat shock protein 81-1; Short=HSP81-1; AltName: Full=Heat shock protein 82 emb|CAA77978.1| heat shock protein 82 (HSP82) [Oryza sativa] dbj|BAD08818.1| heat shock protein 82 [Oryza sativa Japonica Group] dbj|BAD08897.1| heat shock protein 82 [Oryza sativa Japonica Group…
isotig00029	isogroup00013	2365	ref|XP_002444804.1|	hypothetical protein SORBIDRAFT_07g028270 [Sorghum bicolor] gb|EES14299.1| hypothetical protein SORBIDRAFT_07g028270 [Sorghum bicolor]
isotig00030	isogroup00013	2366	gb|ADP89125.1|	heat shock protein 90 [Cenchrus americanus] gb|ADP89126.1| heat shock protein 90 [Cenchrus americanus]
isotig00031	isogroup00013	2366	gb|ADP89125.1|	heat shock protein 90 [Cenchrus americanus] gb|ADP89126.1| heat shock protein 90 [Cenchrus americanus]
isotig00032	isogroup00013	2367	ref|XP_002460433.1|	hypothetical protein SORBIDRAFT_02g028050 [Sorghum bicolor] gb|EER96954.1| hypothetical protein SORBIDRAFT_02g028050 [Sorghum bicolor]
isotig00033	isogroup00013	2387	ref|XP_002460433.1|	hypothetical protein SORBIDRAFT_02g028050 [Sorghum bicolor] gb|EER96954.1| hypothetical protein SORBIDRAFT_02g028050 [Sorghum bicolor]
isotig00034	isogroup00013	2387	ref|XP_002460433.1|	hypothetical protein SORBIDRAFT_02g028050 [Sorghum bicolor] gb|EER96954.1| hypothetical protein SORBIDRAFT_02g028050 [Sorghum bicolor]
isotig00035	isogroup00013	2387	ref|XP_002460433.1|	hypothetical protein SORBIDRAFT_02g028050 [Sorghum bicolor] gb|EER96954.1| hypothetical protein SORBIDRAFT_02g028050 [Sorghum bicolor]
isotig00036	isogroup00013	2367	ref|XP_002460433.1|	hypothetical protein SORBIDRAFT_02g028050 [Sorghum bicolor] gb|EER96954.1| hypothetical protein SORBIDRAFT_02g028050 [Sorghum bicolor]
isotig00037	isogroup00013	2387	ref|XP_002460433.1|	hypothetical protein SORBIDRAFT_02g028050 [Sorghum bicolor] gb|EER96954.1| hypothetical protein SORBIDRAFT_02g028050 [Sorghum bicolor]
isotig00038	isogroup00013	2363	ref|XP_002444804.1|	hypothetical protein SORBIDRAFT_07g028270 [Sorghum bicolor] gb|EES14299.1| hypothetical protein SORBIDRAFT_07g028270 [Sorghum bicolor]
isotig00039	isogroup00013	2367	ref|XP_002460433.1|	hypothetical protein SORBIDRAFT_02g028050 [Sorghum bicolor] gb|EER96954.1| hypothetical protein SORBIDRAFT_02g028050 [Sorghum bicolor]
isotig00040	isogroup00013	2367	ref|XP_002460433.1|	hypothetical protein SORBIDRAFT_02g028050 [Sorghum bicolor] gb|EER96954.1| hypothetical protein SORBIDRAFT_02g028050 [Sorghum bicolor]
isotig00041	isogroup00013	2367	ref|XP_002460433.1|	hypothetical protein SORBIDRAFT_02g028050 [Sorghum bicolor] gb|EER96954.1| hypothetical protein SORBIDRAFT_02g028050 [Sorghum bicolor]
isotig00042	isogroup00013	2384	sp|A2YWQ1.1|HSP81_ORYSI	RecName: Full=Heat shock protein 81-1; Short=HSP81-1; AltName: Full=Heat shock protein 82 sp|Q0J4P2.2|HSP81_ORYSJ RecName: Full=Heat shock protein 81-1; Short=HSP81-1; AltName: Full=Heat shock protein 82 emb|CAA77978.1| heat shock protein 82 (HSP82) [Oryza sativa] dbj|BAD08818.1| heat shock protein 82 [Oryza sativa Japonica Group] dbj|BAD08897.1| heat shock protein 82 [Oryza sativa Japonica Group…
isotig00043	isogroup00013	2366	dbj|BAD73667.1|	putative heat shock protein 82 [Oryza sativa Japonica Group] dbj|BAD73668.1| putative heat shock protein 82 [Oryza sativa Japonica Group]
isotig00044	isogroup00013	2366	gb|ADP89125.1|	heat shock protein 90 [Cenchrus americanus] gb|ADP89126.1| heat shock protein 90 [Cenchrus americanus]
isotig00045	isogroup00013	2366	gb|ADP89125.1|	heat shock protein 90 [Cenchrus americanus] gb|ADP89126.1| heat shock protein 90 [Cenchrus americanus]
isotig00046	isogroup00013	2367	ref|XP_002460433.1|	hypothetical protein SORBIDRAFT_02g028050 [Sorghum bicolor] gb|EER96954.1| hypothetical protein SORBIDRAFT_02g028050 [Sorghum bicolor]
isotig00047	isogroup00013	2366	gb|ADP89125.1|	heat shock protein 90 [Cenchrus americanus] gb|ADP89126.1| heat shock protein 90 [Cenchrus americanus]
isotig00048	isogroup00013	2366	gb|ADP89125.1|	heat shock protein 90 [Cenchrus americanus] gb|ADP89126.1| heat shock protein 90 [Cenchrus americanus]
isotig00049	isogroup00013	2388	ref|XP_002460433.1|	hypothetical protein SORBIDRAFT_02g028050 [Sorghum bicolor] gb|EER96954.1| hypothetical protein SORBIDRAFT_02g028050 [Sorghum bicolor]
isotig00050	isogroup00013	2368	ref|XP_002460433.1|	hypothetical protein SORBIDRAFT_02g028050 [Sorghum bicolor] gb|EER96954.1| hypothetical protein SORBIDRAFT_02g028050 [Sorghum bicolor]
isotig00051	isogroup00013	2367	ref|XP_002460433.1|	hypothetical protein SORBIDRAFT_02g028050 [Sorghum bicolor] gb|EER96954.1| hypothetical protein SORBIDRAFT_02g028050 [Sorghum bicolor]
isotig00052	isogroup00013	2340	ref|XP_002444804.1|	hypothetical protein SORBIDRAFT_07g028270 [Sorghum bicolor] gb|EES14299.1| hypothetical protein SORBIDRAFT_07g028270 [Sorghum bicolor]
isotig00053	isogroup00013	2340	ref|XP_002444804.1|	hypothetical protein SORBIDRAFT_07g028270 [Sorghum bicolor] gb|EES14299.1| hypothetical protein SORBIDRAFT_07g028270 [Sorghum bicolor]
isotig00054	isogroup00013	2336	ref|XP_002444804.1|	hypothetical protein SORBIDRAFT_07g028270 [Sorghum bicolor] gb|EES14299.1| hypothetical protein SORBIDRAFT_07g028270 [Sorghum bicolor]
isotig00055	isogroup00013	2339	gb|ADP89125.1|	heat shock protein 90 [Cenchrus americanus] gb|ADP89126.1| heat shock protein 90 [Cenchrus americanus]
isotig00056	isogroup00013	2339	gb|ADP89125.1|	heat shock protein 90 [Cenchrus americanus] gb|ADP89126.1| heat shock protein 90 [Cenchrus americanus]
isotig00057	isogroup00013	2339	gb|ADP89125.1|	heat shock protein 90 [Cenchrus americanus] gb|ADP89126.1| heat shock protein 90 [Cenchrus americanus]
isotig00058	isogroup00013	2339	gb|ADP89125.1|	heat shock protein 90 [Cenchrus americanus] gb|ADP89126.1| heat shock protein 90 [Cenchrus americanus]
isotig00059	isogroup00013	2340	ref|XP_002444804.1|	hypothetical protein SORBIDRAFT_07g028270 [Sorghum bicolor] gb|EES14299.1| hypothetical protein SORBIDRAFT_07g028270 [Sorghum bicolor]
isotig00060	isogroup00013	2380	ref|XP_002460433.1|	hypothetical protein SORBIDRAFT_02g028050 [Sorghum bicolor] gb|EER96954.1| hypothetical protein SORBIDRAFT_02g028050 [Sorghum bicolor]
isotig00061	isogroup00013	2362	sp|A2YWQ1.1|HSP81_ORYSI	RecName: Full=Heat shock protein 81-1; Short=HSP81-1; AltName: Full=Heat shock protein 82 sp|Q0J4P2.2|HSP81_ORYSJ RecName: Full=Heat shock protein 81-1; Short=HSP81-1; AltName: Full=Heat shock protein 82 emb|CAA77978.1| heat shock protein 82 (HSP82) [Oryza sativa] dbj|BAD08818.1| heat shock protein 82 [Oryza sativa Japonica Group] dbj|BAD08897.1| heat shock protein 82 [Oryza sativa Japonica Group…
isotig00062	isogroup00013	2380	ref|XP_002460433.1|	hypothetical protein SORBIDRAFT_02g028050 [Sorghum bicolor] gb|EER96954.1| hypothetical protein SORBIDRAFT_02g028050 [Sorghum bicolor]
isotig00063	isogroup00013	2362	sp|A2YWQ1.1|HSP81_ORYSI	RecName: Full=Heat shock protein 81-1; Short=HSP81-1; AltName: Full=Heat shock protein 82 sp|Q0J4P2.2|HSP81_ORYSJ RecName: Full=Heat shock protein 81-1; Short=HSP81-1; AltName: Full=Heat shock protein 82 emb|CAA77978.1| heat shock protein 82 (HSP82) [Oryza sativa] dbj|BAD08818.1| heat shock protein 82 [Oryza sativa Japonica Group] dbj|BAD08897.1| heat shock protein 82 [Oryza sativa Japonica Group…
isotig00064	isogroup00013	2365	ref|XP_002460433.1|	hypothetical protein SORBIDRAFT_02g028050 [Sorghum bicolor] gb|EER96954.1| hypothetical protein SORBIDRAFT_02g028050 [Sorghum bicolor]
isotig00065	isogroup00013	2381	ref|XP_002444804.1|	hypothetical protein SORBIDRAFT_07g028270 [Sorghum bicolor] gb|EES14299.1| hypothetical protein SORBIDRAFT_07g028270 [Sorghum bicolor]
isotig00066	isogroup00013	2364	ref|XP_002444804.1|	hypothetical protein SORBIDRAFT_07g028270 [Sorghum bicolor] gb|EES14299.1| hypothetical protein SORBIDRAFT_07g028270 [Sorghum bicolor]
isotig00067	isogroup00013	2365	ref|XP_002460433.1|	hypothetical protein SORBIDRAFT_02g028050 [Sorghum bicolor] gb|EER96954.1| hypothetical protein SORBIDRAFT_02g028050 [Sorghum bicolor]
isotig00068	isogroup00013	2381	ref|XP_002444804.1|	hypothetical protein SORBIDRAFT_07g028270 [Sorghum bicolor] gb|EES14299.1| hypothetical protein SORBIDRAFT_07g028270 [Sorghum bicolor]
isotig00069	isogroup00013	2364	ref|XP_002444804.1|	hypothetical protein SORBIDRAFT_07g028270 [Sorghum bicolor] gb|EES14299.1| hypothetical protein SORBIDRAFT_07g028270 [Sorghum bicolor]
isotig00070	isogroup00013	2366	ref|XP_002444804.1|	hypothetical protein SORBIDRAFT_07g028270 [Sorghum bicolor] gb|EES14299.1| hypothetical protein SORBIDRAFT_07g028270 [Sorghum bicolor]
isotig00071	isogroup00013	2366	ref|XP_002444804.1|	hypothetical protein SORBIDRAFT_07g028270 [Sorghum bicolor] gb|EES14299.1| hypothetical protein SORBIDRAFT_07g028270 [Sorghum bicolor]
isotig00072	isogroup00016	3570	ref|XP_002532753.1|	ATP binding protein, putative [Ricinus communis] gb|EEF29630.1| ATP binding protein, putative [Ricinus communis]
isotig00073	isogroup00016	3341	gb|EEE55257.1|	hypothetical protein OsJ_03160 [Oryza sativa Japonica Group]
isotig00074	isogroup00016	3430	ref|XP_002532753.1|	ATP binding protein, putative [Ricinus communis] gb|EEF29630.1| ATP binding protein, putative [Ricinus communis]
isotig00075	isogroup00016	3430	ref|XP_002532753.1|	ATP binding protein, putative [Ricinus communis] gb|EEF29630.1| ATP binding protein, putative [Ricinus communis]
isotig00076	isogroup00016	3152	ref|XP_002463924.1|	hypothetical protein SORBIDRAFT_01g009025 [Sorghum bicolor] gb|EER90922.1| hypothetical protein SORBIDRAFT_01g009025 [Sorghum bicolor]
isotig00077	isogroup00016	3187	gb|AFW59532.1|	hypothetical protein ZEAMMB73_391300 [Zea mays]
isotig00078	isogroup00016	2815	gb|EEE60270.1|	hypothetical protein OsJ_13307 [Oryza sativa Japonica Group]
isotig00079	isogroup00016	2795	gb|AFW86126.1|	hypothetical protein ZEAMMB73_343190 [Zea mays]
isotig00080	isogroup00016	2776	gb|AFW86126.1|	hypothetical protein ZEAMMB73_343190 [Zea mays]
isotig00081	isogroup00016	2655	gb|AFW86126.1|	hypothetical protein ZEAMMB73_343190 [Zea mays]
isotig00082	isogroup00016	2655	gb|AFW86126.1|	hypothetical protein ZEAMMB73_343190 [Zea mays]
isotig00083	isogroup00016	2636	gb|AFW86126.1|	hypothetical protein ZEAMMB73_343190 [Zea mays]
isotig00084	isogroup00016	2636	gb|AFW86126.1|	hypothetical protein ZEAMMB73_343190 [Zea mays]
isotig00085	isogroup00016	2417	gb|EEC76496.1|	hypothetical protein OsI_14255 [Oryza sativa Indica Group]
isotig00086	isogroup00016	2446	gb|ABA96434.1|	expressed protein [Oryza sativa Japonica Group]
isotig00087	isogroup00016	2408	gb|EEE62169.1|	hypothetical protein OsJ_16956 [Oryza sativa Japonica Group]
isotig00088	isogroup00016	1652	ref|NP_001059571.1|	Os07g0458800 [Oryza sativa Japonica Group] dbj|BAF21485.1| Os07g0458800, partial [Oryza sativa Japonica Group]
isotig00089	isogroup00016	1492	ref|NP_001059571.1|	Os07g0458800 [Oryza sativa Japonica Group] dbj|BAF21485.1| Os07g0458800, partial [Oryza sativa Japonica Group]
isotig00090	isogroup00016	1581	gb|EEE55473.1|	hypothetical protein OsJ_03652 [Oryza sativa Japonica Group]
isotig00091	isogroup00016	1433	ref|XP_002457571.1|	hypothetical protein SORBIDRAFT_03g009630 [Sorghum bicolor] gb|EES02691.1| hypothetical protein SORBIDRAFT_03g009630 [Sorghum bicolor]
isotig00092	isogroup00016	1400	ref|XP_002457571.1|	hypothetical protein SORBIDRAFT_03g009630 [Sorghum bicolor] gb|EES02691.1| hypothetical protein SORBIDRAFT_03g009630 [Sorghum bicolor]
isotig00093	isogroup00016	1289
isotig00094	isogroup00016	1276
isotig00095	isogroup00016	1165	ref|XP_002466012.1|	hypothetical protein SORBIDRAFT_01g050060 [Sorghum bicolor] gb|EER93010.1| hypothetical protein SORBIDRAFT_01g050060 [Sorghum bicolor]
isotig00096	isogroup00016	997	ref|XP_002466012.1|	hypothetical protein SORBIDRAFT_01g050060 [Sorghum bicolor] gb|EER93010.1| hypothetical protein SORBIDRAFT_01g050060 [Sorghum bicolor]
isotig00097	isogroup00016	912	gb|ACG41285.1|	serine/threonine-protein kinase 19 [Zea mays]
isotig00098	isogroup00017	4698	ref|NP_001169698.1|	uncharacterized protein LOC100383579 [Zea mays] gb|ACN34576.1| unknown [Zea mays] tpg|DAA38145.1| TPA: hypothetical protein ZEAMMB73_078020 [Zea mays] tpg|DAA38146.1| TPA: hypothetical protein ZEAMMB73_078020 [Zea mays]
isotig00099	isogroup00017	4614	ref|NP_001169698.1|	uncharacterized protein LOC100383579 [Zea mays] gb|ACN34576.1| unknown [Zea mays] tpg|DAA38145.1| TPA: hypothetical protein ZEAMMB73_078020 [Zea mays] tpg|DAA38146.1| TPA: hypothetical protein ZEAMMB73_078020 [Zea mays]
isotig00100	isogroup00017	4698	ref|NP_001169698.1|	uncharacterized protein LOC100383579 [Zea mays] gb|ACN34576.1| unknown [Zea mays] tpg|DAA38145.1| TPA: hypothetical protein ZEAMMB73_078020 [Zea mays] tpg|DAA38146.1| TPA: hypothetical protein ZEAMMB73_078020 [Zea mays]
isotig00101	isogroup00017	4614	ref|NP_001169698.1|	uncharacterized protein LOC100383579 [Zea mays] gb|ACN34576.1| unknown [Zea mays] tpg|DAA38145.1| TPA: hypothetical protein ZEAMMB73_078020 [Zea mays] tpg|DAA38146.1| TPA: hypothetical protein ZEAMMB73_078020 [Zea mays]
isotig00102	isogroup00017	4698	ref|NP_001169698.1|	uncharacterized protein LOC100383579 [Zea mays] gb|ACN34576.1| unknown [Zea mays] tpg|DAA38145.1| TPA: hypothetical protein ZEAMMB73_078020 [Zea mays] tpg|DAA38146.1| TPA: hypothetical protein ZEAMMB73_078020 [Zea mays]
isotig00103	isogroup00017	4614	ref|NP_001169698.1|	uncharacterized protein LOC100383579 [Zea mays] gb|ACN34576.1| unknown [Zea mays] tpg|DAA38145.1| TPA: hypothetical protein ZEAMMB73_078020 [Zea mays] tpg|DAA38146.1| TPA: hypothetical protein ZEAMMB73_078020 [Zea mays]
isotig00104	isogroup00017	4698	ref|NP_001169698.1|	uncharacterized protein LOC100383579 [Zea mays] gb|ACN34576.1| unknown [Zea mays] tpg|DAA38145.1| TPA: hypothetical protein ZEAMMB73_078020 [Zea mays] tpg|DAA38146.1| TPA: hypothetical protein ZEAMMB73_078020 [Zea mays]
isotig00105	isogroup00017	4614	ref|NP_001169698.1|	uncharacterized protein LOC100383579 [Zea mays] gb|ACN34576.1| unknown [Zea mays] tpg|DAA38145.1| TPA: hypothetical protein ZEAMMB73_078020 [Zea mays] tpg|DAA38146.1| TPA: hypothetical protein ZEAMMB73_078020 [Zea mays]
isotig00106	isogroup00017	4697	ref|NP_001169698.1|	uncharacterized protein LOC100383579 [Zea mays] gb|ACN34576.1| unknown [Zea mays] tpg|DAA38145.1| TPA: hypothetical protein ZEAMMB73_078020 [Zea mays] tpg|DAA38146.1| TPA: hypothetical protein ZEAMMB73_078020 [Zea mays]
isotig00107	isogroup00017	4597	ref|NP_001169698.1|	uncharacterized protein LOC100383579 [Zea mays] gb|ACN34576.1| unknown [Zea mays] tpg|DAA38145.1| TPA: hypothetical protein ZEAMMB73_078020 [Zea mays] tpg|DAA38146.1| TPA: hypothetical protein ZEAMMB73_078020 [Zea mays]
isotig00108	isogroup00017	4613	ref|NP_001169698.1|	uncharacterized protein LOC100383579 [Zea mays] gb|ACN34576.1| unknown [Zea mays] tpg|DAA38145.1| TPA: hypothetical protein ZEAMMB73_078020 [Zea mays] tpg|DAA38146.1| TPA: hypothetical protein ZEAMMB73_078020 [Zea mays]
isotig00109	isogroup00017	4513	ref|NP_001169698.1|	uncharacterized protein LOC100383579 [Zea mays] gb|ACN34576.1| unknown [Zea mays] tpg|DAA38145.1| TPA: hypothetical protein ZEAMMB73_078020 [Zea mays] tpg|DAA38146.1| TPA: hypothetical protein ZEAMMB73_078020 [Zea mays]
isotig00110	isogroup00017	4697	ref|NP_001169698.1|	uncharacterized protein LOC100383579 [Zea mays] gb|ACN34576.1| unknown [Zea mays] tpg|DAA38145.1| TPA: hypothetical protein ZEAMMB73_078020 [Zea mays] tpg|DAA38146.1| TPA: hypothetical protein ZEAMMB73_078020 [Zea mays]
isotig00111	isogroup00017	4597	ref|NP_001169698.1|	uncharacterized protein LOC100383579 [Zea mays] gb|ACN34576.1| unknown [Zea mays] tpg|DAA38145.1| TPA: hypothetical protein ZEAMMB73_078020 [Zea mays] tpg|DAA38146.1| TPA: hypothetical protein ZEAMMB73_078020 [Zea mays]
isotig00112	isogroup00017	4613	ref|NP_001169698.1|	uncharacterized protein LOC100383579 [Zea mays] gb|ACN34576.1| unknown [Zea mays] tpg|DAA38145.1| TPA: hypothetical protein ZEAMMB73_078020 [Zea mays] tpg|DAA38146.1| TPA: hypothetical protein ZEAMMB73_078020 [Zea mays]
isotig00113	isogroup00017	4513	ref|NP_001169698.1|	uncharacterized protein LOC100383579 [Zea mays] gb|ACN34576.1| unknown [Zea mays] tpg|DAA38145.1| TPA: hypothetical protein ZEAMMB73_078020 [Zea mays] tpg|DAA38146.1| TPA: hypothetical protein ZEAMMB73_078020 [Zea mays]
isotig00114	isogroup00017	4697	ref|NP_001169698.1|	uncharacterized protein LOC100383579 [Zea mays] gb|ACN34576.1| unknown [Zea mays] tpg|DAA38145.1| TPA: hypothetical protein ZEAMMB73_078020 [Zea mays] tpg|DAA38146.1| TPA: hypothetical protein ZEAMMB73_078020 [Zea mays]
isotig00115	isogroup00017	4559	ref|NP_001169698.1|	uncharacterized protein LOC100383579 [Zea mays] gb|ACN34576.1| unknown [Zea mays] tpg|DAA38145.1| TPA: hypothetical protein ZEAMMB73_078020 [Zea mays] tpg|DAA38146.1| TPA: hypothetical protein ZEAMMB73_078020 [Zea mays]
isotig00116	isogroup00017	4597	ref|NP_001169698.1|	uncharacterized protein LOC100383579 [Zea mays] gb|ACN34576.1| unknown [Zea mays] tpg|DAA38145.1| TPA: hypothetical protein ZEAMMB73_078020 [Zea mays] tpg|DAA38146.1| TPA: hypothetical protein ZEAMMB73_078020 [Zea mays]
isotig00117	isogroup00017	4613	ref|NP_001169698.1|	uncharacterized protein LOC100383579 [Zea mays] gb|ACN34576.1| unknown [Zea mays] tpg|DAA38145.1| TPA: hypothetical protein ZEAMMB73_078020 [Zea mays] tpg|DAA38146.1| TPA: hypothetical protein ZEAMMB73_078020 [Zea mays]
isotig00118	isogroup00017	4513	ref|NP_001169698.1|	uncharacterized protein LOC100383579 [Zea mays] gb|ACN34576.1| unknown [Zea mays] tpg|DAA38145.1| TPA: hypothetical protein ZEAMMB73_078020 [Zea mays] tpg|DAA38146.1| TPA: hypothetical protein ZEAMMB73_078020 [Zea mays]
isotig00119	isogroup00017	4568	ref|NP_001169698.1|	uncharacterized protein LOC100383579 [Zea mays] gb|ACN34576.1| unknown [Zea mays] tpg|DAA38145.1| TPA: hypothetical protein ZEAMMB73_078020 [Zea mays] tpg|DAA38146.1| TPA: hypothetical protein ZEAMMB73_078020 [Zea mays]
isotig00120	isogroup00017	4697	ref|NP_001169698.1|	uncharacterized protein LOC100383579 [Zea mays] gb|ACN34576.1| unknown [Zea mays] tpg|DAA38145.1| TPA: hypothetical protein ZEAMMB73_078020 [Zea mays] tpg|DAA38146.1| TPA: hypothetical protein ZEAMMB73_078020 [Zea mays]
isotig00121	isogroup00017	4559	ref|NP_001169698.1|	uncharacterized protein LOC100383579 [Zea mays] gb|ACN34576.1| unknown [Zea mays] tpg|DAA38145.1| TPA: hypothetical protein ZEAMMB73_078020 [Zea mays] tpg|DAA38146.1| TPA: hypothetical protein ZEAMMB73_078020 [Zea mays]
isotig00122	isogroup00017	4597	ref|NP_001169698.1|	uncharacterized protein LOC100383579 [Zea mays] gb|ACN34576.1| unknown [Zea mays] tpg|DAA38145.1| TPA: hypothetical protein ZEAMMB73_078020 [Zea mays] tpg|DAA38146.1| TPA: hypothetical protein ZEAMMB73_078020 [Zea mays]
isotig00123	isogroup00017	4613	ref|NP_001169698.1|	uncharacterized protein LOC100383579 [Zea mays] gb|ACN34576.1| unknown [Zea mays] tpg|DAA38145.1| TPA: hypothetical protein ZEAMMB73_078020 [Zea mays] tpg|DAA38146.1| TPA: hypothetical protein ZEAMMB73_078020 [Zea mays]
isotig00124	isogroup00017	4513	ref|NP_001169698.1|	uncharacterized protein LOC100383579 [Zea mays] gb|ACN34576.1| unknown [Zea mays] tpg|DAA38145.1| TPA: hypothetical protein ZEAMMB73_078020 [Zea mays] tpg|DAA38146.1| TPA: hypothetical protein ZEAMMB73_078020 [Zea mays]
isotig00125	isogroup00017	4596	ref|NP_001169698.1|	uncharacterized protein LOC100383579 [Zea mays] gb|ACN34576.1| unknown [Zea mays] tpg|DAA38145.1| TPA: hypothetical protein ZEAMMB73_078020 [Zea mays] tpg|DAA38146.1| TPA: hypothetical protein ZEAMMB73_078020 [Zea mays]
isotig00126	isogroup00017	4568	ref|NP_001169698.1|	uncharacterized protein LOC100383579 [Zea mays] gb|ACN34576.1| unknown [Zea mays] tpg|DAA38145.1| TPA: hypothetical protein ZEAMMB73_078020 [Zea mays] tpg|DAA38146.1| TPA: hypothetical protein ZEAMMB73_078020 [Zea mays]
isotig00127	isogroup00017	4512	ref|NP_001169698.1|	uncharacterized protein LOC100383579 [Zea mays] gb|ACN34576.1| unknown [Zea mays] tpg|DAA38145.1| TPA: hypothetical protein ZEAMMB73_078020 [Zea mays] tpg|DAA38146.1| TPA: hypothetical protein ZEAMMB73_078020 [Zea mays]
isotig00128	isogroup00017	4559	ref|NP_001169698.1|	uncharacterized protein LOC100383579 [Zea mays] gb|ACN34576.1| unknown [Zea mays] tpg|DAA38145.1| TPA: hypothetical protein ZEAMMB73_078020 [Zea mays] tpg|DAA38146.1| TPA: hypothetical protein ZEAMMB73_078020 [Zea mays]
isotig00129	isogroup00017	4693	gb|AFW58075.1|	hypothetical protein ZEAMMB73_382390 [Zea mays]
isotig00130	isogroup00017	4609	gb|AFW58075.1|	hypothetical protein ZEAMMB73_382390 [Zea mays]
isotig00131	isogroup00017	4596	ref|NP_001169698.1|	uncharacterized protein LOC100383579 [Zea mays] gb|ACN34576.1| unknown [Zea mays] tpg|DAA38145.1| TPA: hypothetical protein ZEAMMB73_078020 [Zea mays] tpg|DAA38146.1| TPA: hypothetical protein ZEAMMB73_078020 [Zea mays]
isotig00132	isogroup00017	4512	ref|NP_001169698.1|	uncharacterized protein LOC100383579 [Zea mays] gb|ACN34576.1| unknown [Zea mays] tpg|DAA38145.1| TPA: hypothetical protein ZEAMMB73_078020 [Zea mays] tpg|DAA38146.1| TPA: hypothetical protein ZEAMMB73_078020 [Zea mays]
isotig00133	isogroup00017	4559	ref|NP_001169698.1|	uncharacterized protein LOC100383579 [Zea mays] gb|ACN34576.1| unknown [Zea mays] tpg|DAA38145.1| TPA: hypothetical protein ZEAMMB73_078020 [Zea mays] tpg|DAA38146.1| TPA: hypothetical protein ZEAMMB73_078020 [Zea mays]
isotig00134	isogroup00017	4596	ref|NP_001169698.1|	uncharacterized protein LOC100383579 [Zea mays] gb|ACN34576.1| unknown [Zea mays] tpg|DAA38145.1| TPA: hypothetical protein ZEAMMB73_078020 [Zea mays] tpg|DAA38146.1| TPA: hypothetical protein ZEAMMB73_078020 [Zea mays]
isotig00135	isogroup00017	4568	ref|NP_001169698.1|	uncharacterized protein LOC100383579 [Zea mays] gb|ACN34576.1| unknown [Zea mays] tpg|DAA38145.1| TPA: hypothetical protein ZEAMMB73_078020 [Zea mays] tpg|DAA38146.1| TPA: hypothetical protein ZEAMMB73_078020 [Zea mays]
isotig00136	isogroup00017	4512	ref|NP_001169698.1|	uncharacterized protein LOC100383579 [Zea mays] gb|ACN34576.1| unknown [Zea mays] tpg|DAA38145.1| TPA: hypothetical protein ZEAMMB73_078020 [Zea mays] tpg|DAA38146.1| TPA: hypothetical protein ZEAMMB73_078020 [Zea mays]
isotig00137	isogroup00017	4559	ref|NP_001169698.1|	uncharacterized protein LOC100383579 [Zea mays] gb|ACN34576.1| unknown [Zea mays] tpg|DAA38145.1| TPA: hypothetical protein ZEAMMB73_078020 [Zea mays] tpg|DAA38146.1| TPA: hypothetical protein ZEAMMB73_078020 [Zea mays]
isotig00138	isogroup00017	4693	gb|AFW58075.1|	hypothetical protein ZEAMMB73_382390 [Zea mays]
isotig00139	isogroup00017	4609	gb|AFW58075.1|	hypothetical protein ZEAMMB73_382390 [Zea mays]
isotig00140	isogroup00017	4693	gb|AFW58075.1|	hypothetical protein ZEAMMB73_382390 [Zea mays]
isotig00141	isogroup00017	4568	ref|NP_001169698.1|	uncharacterized protein LOC100383579 [Zea mays] gb|ACN34576.1| unknown [Zea mays] tpg|DAA38145.1| TPA: hypothetical protein ZEAMMB73_078020 [Zea mays] tpg|DAA38146.1| TPA: hypothetical protein ZEAMMB73_078020 [Zea mays]
isotig00142	isogroup00017	4609	gb|AFW58075.1|	hypothetical protein ZEAMMB73_382390 [Zea mays]
isotig00143	isogroup00017	4559	ref|NP_001169698.1|	uncharacterized protein LOC100383579 [Zea mays] gb|ACN34576.1| unknown [Zea mays] tpg|DAA38145.1| TPA: hypothetical protein ZEAMMB73_078020 [Zea mays] tpg|DAA38146.1| TPA: hypothetical protein ZEAMMB73_078020 [Zea mays]
isotig00144	isogroup00017	4596	ref|NP_001169698.1|	uncharacterized protein LOC100383579 [Zea mays] gb|ACN34576.1| unknown [Zea mays] tpg|DAA38145.1| TPA: hypothetical protein ZEAMMB73_078020 [Zea mays] tpg|DAA38146.1| TPA: hypothetical protein ZEAMMB73_078020 [Zea mays]
isotig00145	isogroup00017	4568	ref|NP_001169698.1|	uncharacterized protein LOC100383579 [Zea mays] gb|ACN34576.1| unknown [Zea mays] tpg|DAA38145.1| TPA: hypothetical protein ZEAMMB73_078020 [Zea mays] tpg|DAA38146.1| TPA: hypothetical protein ZEAMMB73_078020 [Zea mays]
isotig00146	isogroup00017	4512	ref|NP_001169698.1|	uncharacterized protein LOC100383579 [Zea mays] gb|ACN34576.1| unknown [Zea mays] tpg|DAA38145.1| TPA: hypothetical protein ZEAMMB73_078020 [Zea mays] tpg|DAA38146.1| TPA: hypothetical protein ZEAMMB73_078020 [Zea mays]
isotig00147	isogroup00017	4692	gb|AFW58075.1|	hypothetical protein ZEAMMB73_382390 [Zea mays]
isotig00148	isogroup00017	4568	ref|NP_001169698.1|	uncharacterized protein LOC100383579 [Zea mays] gb|ACN34576.1| unknown [Zea mays] tpg|DAA38145.1| TPA: hypothetical protein ZEAMMB73_078020 [Zea mays] tpg|DAA38146.1| TPA: hypothetical protein ZEAMMB73_078020 [Zea mays]
isotig00149	isogroup00017	4608	gb|AFW58075.1|	hypothetical protein ZEAMMB73_382390 [Zea mays]
isotig00150	isogroup00017	4559	ref|NP_001169698.1|	uncharacterized protein LOC100383579 [Zea mays] gb|ACN34576.1| unknown [Zea mays] tpg|DAA38145.1| TPA: hypothetical protein ZEAMMB73_078020 [Zea mays] tpg|DAA38146.1| TPA: hypothetical protein ZEAMMB73_078020 [Zea mays]
isotig00151	isogroup00017	4592	gb|AFW58075.1|	hypothetical protein ZEAMMB73_382390 [Zea mays]
isotig00152	isogroup00017	4508	gb|AFW58075.1|	hypothetical protein ZEAMMB73_382390 [Zea mays]
isotig00153	isogroup00017	4568	ref|NP_001169698.1|	uncharacterized protein LOC100383579 [Zea mays] gb|ACN34576.1| unknown [Zea mays] tpg|DAA38145.1| TPA: hypothetical protein ZEAMMB73_078020 [Zea mays] tpg|DAA38146.1| TPA: hypothetical protein ZEAMMB73_078020 [Zea mays]
isotig00154	isogroup00017	4559	ref|NP_001169698.1|	uncharacterized protein LOC100383579 [Zea mays] gb|ACN34576.1| unknown [Zea mays] tpg|DAA38145.1| TPA: hypothetical protein ZEAMMB73_078020 [Zea mays] tpg|DAA38146.1| TPA: hypothetical protein ZEAMMB73_078020 [Zea mays]
isotig00155	isogroup00017	4592	gb|AFW58075.1|	hypothetical protein ZEAMMB73_382390 [Zea mays]
isotig00156	isogroup00017	4508	gb|AFW58075.1|	hypothetical protein ZEAMMB73_382390 [Zea mays]
isotig00157	isogroup00017	4554	gb|AFW58075.1|	hypothetical protein ZEAMMB73_382390 [Zea mays]
isotig00158	isogroup00017	4592	gb|AFW58075.1|	hypothetical protein ZEAMMB73_382390 [Zea mays]
isotig00159	isogroup00017	4508	gb|AFW58075.1|	hypothetical protein ZEAMMB73_382390 [Zea mays]
isotig00160	isogroup00017	4568	ref|NP_001169698.1|	uncharacterized protein LOC100383579 [Zea mays] gb|ACN34576.1| unknown [Zea mays] tpg|DAA38145.1| TPA: hypothetical protein ZEAMMB73_078020 [Zea mays] tpg|DAA38146.1| TPA: hypothetical protein ZEAMMB73_078020 [Zea mays]
isotig00161	isogroup00017	4563	gb|AFW58075.1|	hypothetical protein ZEAMMB73_382390 [Zea mays]
isotig00162	isogroup00017	4553	gb|AFW58075.1|	hypothetical protein ZEAMMB73_382390 [Zea mays]
isotig00163	isogroup00017	4592	gb|AFW58075.1|	hypothetical protein ZEAMMB73_382390 [Zea mays]
isotig00164	isogroup00017	4508	gb|AFW58075.1|	hypothetical protein ZEAMMB73_382390 [Zea mays]
isotig00165	isogroup00017	4562	gb|AFW58075.1|	hypothetical protein ZEAMMB73_382390 [Zea mays]
isotig00166	isogroup00017	4554	gb|AFW58075.1|	hypothetical protein ZEAMMB73_382390 [Zea mays]
isotig00167	isogroup00017	4563	gb|AFW58075.1|	hypothetical protein ZEAMMB73_382390 [Zea mays]
isotig00168	isogroup00017	4553	gb|AFW58075.1|	hypothetical protein ZEAMMB73_382390 [Zea mays]
isotig00169	isogroup00017	4556	ref|NP_001169698.1|	uncharacterized protein LOC100383579 [Zea mays] gb|ACN34576.1| unknown [Zea mays] tpg|DAA38145.1| TPA: hypothetical protein ZEAMMB73_078020 [Zea mays] tpg|DAA38146.1| TPA: hypothetical protein ZEAMMB73_078020 [Zea mays]
isotig00170	isogroup00017	4562	gb|AFW58075.1|	hypothetical protein ZEAMMB73_382390 [Zea mays]
isotig00171	isogroup00017	4565	ref|NP_001169698.1|	uncharacterized protein LOC100383579 [Zea mays] gb|ACN34576.1| unknown [Zea mays] tpg|DAA38145.1| TPA: hypothetical protein ZEAMMB73_078020 [Zea mays] tpg|DAA38146.1| TPA: hypothetical protein ZEAMMB73_078020 [Zea mays]
isotig00172	isogroup00017	4556	ref|NP_001169698.1|	uncharacterized protein LOC100383579 [Zea mays] gb|ACN34576.1| unknown [Zea mays] tpg|DAA38145.1| TPA: hypothetical protein ZEAMMB73_078020 [Zea mays] tpg|DAA38146.1| TPA: hypothetical protein ZEAMMB73_078020 [Zea mays]
isotig00173	isogroup00017	4565	ref|NP_001169698.1|	uncharacterized protein LOC100383579 [Zea mays] gb|ACN34576.1| unknown [Zea mays] tpg|DAA38145.1| TPA: hypothetical protein ZEAMMB73_078020 [Zea mays] tpg|DAA38146.1| TPA: hypothetical protein ZEAMMB73_078020 [Zea mays]
isotig00174	isogroup00017	4551	gb|AFW58075.1|	hypothetical protein ZEAMMB73_382390 [Zea mays]
isotig00175	isogroup00017	4560	gb|AFW58075.1|	hypothetical protein ZEAMMB73_382390 [Zea mays]
isotig00176	isogroup00017	3578	ref|NP_001169698.1|	uncharacterized protein LOC100383579 [Zea mays] gb|ACN34576.1| unknown [Zea mays] tpg|DAA38145.1| TPA: hypothetical protein ZEAMMB73_078020 [Zea mays] tpg|DAA38146.1| TPA: hypothetical protein ZEAMMB73_078020 [Zea mays]
isotig00177	isogroup00017	3577	ref|NP_001169698.1|	uncharacterized protein LOC100383579 [Zea mays] gb|ACN34576.1| unknown [Zea mays] tpg|DAA38145.1| TPA: hypothetical protein ZEAMMB73_078020 [Zea mays] tpg|DAA38146.1| TPA: hypothetical protein ZEAMMB73_078020 [Zea mays]
isotig00178	isogroup00017	3544	ref|NP_001169698.1|	uncharacterized protein LOC100383579 [Zea mays] gb|ACN34576.1| unknown [Zea mays] tpg|DAA38145.1| TPA: hypothetical protein ZEAMMB73_078020 [Zea mays] tpg|DAA38146.1| TPA: hypothetical protein ZEAMMB73_078020 [Zea mays]
isotig00179	isogroup00017	3573	gb|AFW58075.1|	hypothetical protein ZEAMMB73_382390 [Zea mays]
isotig00180	isogroup00017	3543	ref|NP_001169698.1|	uncharacterized protein LOC100383579 [Zea mays] gb|ACN34576.1| unknown [Zea mays] tpg|DAA38145.1| TPA: hypothetical protein ZEAMMB73_078020 [Zea mays] tpg|DAA38146.1| TPA: hypothetical protein ZEAMMB73_078020 [Zea mays]
isotig00181	isogroup00017	3539	ref|XP_002446307.1|	hypothetical protein SORBIDRAFT_06g013940 [Sorghum bicolor] gb|EES10635.1| hypothetical protein SORBIDRAFT_06g013940 [Sorghum bicolor]
isotig00182	isogroup00017	1595	tpg|DAA48694.1|	TPA: vignain [Zea mays]
isotig00183	isogroup00017	1511	tpg|DAA48694.1|	TPA: vignain [Zea mays]
isotig00184	isogroup00017	1595	tpg|DAA48694.1|	TPA: vignain [Zea mays]
isotig00185	isogroup00017	1511	tpg|DAA48694.1|	TPA: vignain [Zea mays]
isotig00186	isogroup00017	1494	ref|NP_001151278.1|	LOC100284911 precursor [Zea mays] gb|ACG42212.1| vignain precursor [Zea mays]
isotig00187	isogroup00017	1410	ref|NP_001151278.1|	LOC100284911 precursor [Zea mays] gb|ACG42212.1| vignain precursor [Zea mays]
isotig00188	isogroup00017	1456	ref|XP_002445702.1|	hypothetical protein SORBIDRAFT_07g024430 [Sorghum bicolor] gb|EES15197.1| hypothetical protein SORBIDRAFT_07g024430 [Sorghum bicolor]
isotig00189	isogroup00017	1494	ref|NP_001151278.1|	LOC100284911 precursor [Zea mays] gb|ACG42212.1| vignain precursor [Zea mays]
isotig00190	isogroup00017	1410	ref|NP_001151278.1|	LOC100284911 precursor [Zea mays] gb|ACG42212.1| vignain precursor [Zea mays]
isotig00191	isogroup00017	1465	ref|XP_002445702.1|	hypothetical protein SORBIDRAFT_07g024430 [Sorghum bicolor] gb|EES15197.1| hypothetical protein SORBIDRAFT_07g024430 [Sorghum bicolor]
isotig00192	isogroup00017	1456	ref|XP_002445702.1|	hypothetical protein SORBIDRAFT_07g024430 [Sorghum bicolor] gb|EES15197.1| hypothetical protein SORBIDRAFT_07g024430 [Sorghum bicolor]
isotig00193	isogroup00017	1465	ref|XP_002445702.1|	hypothetical protein SORBIDRAFT_07g024430 [Sorghum bicolor] gb|EES15197.1| hypothetical protein SORBIDRAFT_07g024430 [Sorghum bicolor]
isotig00194	isogroup00020	1696
isotig00195	isogroup00020	1695
isotig00196	isogroup00020	1683
isotig00197	isogroup00020	1682
isotig00198	isogroup00020	1651
isotig00199	isogroup00020	1650
isotig00200	isogroup00020	1638
isotig00201	isogroup00020	1693
isotig00202	isogroup00020	1637
isotig00203	isogroup00020	1692
isotig00204	isogroup00020	1627
isotig00205	isogroup00020	1681
isotig00206	isogroup00020	1626
isotig00207	isogroup00020	1680
isotig00208	isogroup00020	1648
isotig00209	isogroup00020	1647
isotig00210	isogroup00020	1614
isotig00211	isogroup00020	1613
isotig00212	isogroup00020	1636
isotig00213	isogroup00020	1635
isotig00214	isogroup00020	1624
isotig00215	isogroup00020	1623
isotig00216	isogroup00020	1612
isotig00217	isogroup00020	1611
isotig00218	isogroup00020	1463
isotig00219	isogroup00020	1462
isotig00220	isogroup00020	1418
isotig00221	isogroup00020	1417
isotig00222	isogroup00020	1394
isotig00223	isogroup00020	1393
isotig00224	isogroup00020	1413
isotig00225	isogroup00020	1412
isotig00226	isogroup00020	1400
isotig00227	isogroup00020	1399
isotig00228	isogroup00020	1410
isotig00229	isogroup00020	1409
isotig00230	isogroup00020	1398
isotig00231	isogroup00020	1397
isotig00232	isogroup00020	1181
isotig00233	isogroup00020	1179
isotig00234	isogroup00020	832
isotig00235	isogroup00020	793
isotig00236	isogroup00020	704
isotig00237	isogroup00020	595
isotig00238	isogroup00020	584
isotig00239	isogroup00020	537
isotig00240	isogroup00020	442
isotig00241	isogroup00022	2168	gb|EAY88485.1|	hypothetical protein OsI_09956 [Oryza sativa Indica Group] gb|EAZ25531.1| hypothetical protein OsJ_09355 [Oryza sativa Japonica Group]
isotig00242	isogroup00022	2168	gb|EAY88485.1|	hypothetical protein OsI_09956 [Oryza sativa Indica Group] gb|EAZ25531.1| hypothetical protein OsJ_09355 [Oryza sativa Japonica Group]
isotig00243	isogroup00022	2168	gb|EAY88485.1|	hypothetical protein OsI_09956 [Oryza sativa Indica Group] gb|EAZ25531.1| hypothetical protein OsJ_09355 [Oryza sativa Japonica Group]
isotig00244	isogroup00022	2166	gb|EAY88485.1|	hypothetical protein OsI_09956 [Oryza sativa Indica Group] gb|EAZ25531.1| hypothetical protein OsJ_09355 [Oryza sativa Japonica Group]
isotig00245	isogroup00022	2166	gb|EAY88485.1|	hypothetical protein OsI_09956 [Oryza sativa Indica Group] gb|EAZ25531.1| hypothetical protein OsJ_09355 [Oryza sativa Japonica Group]
isotig00246	isogroup00022	2169	gb|EAY88485.1|	hypothetical protein OsI_09956 [Oryza sativa Indica Group] gb|EAZ25531.1| hypothetical protein OsJ_09355 [Oryza sativa Japonica Group]
isotig00247	isogroup00022	2169	gb|EAY88485.1|	hypothetical protein OsI_09956 [Oryza sativa Indica Group] gb|EAZ25531.1| hypothetical protein OsJ_09355 [Oryza sativa Japonica Group]
isotig00248	isogroup00022	2166	gb|EAY88485.1|	hypothetical protein OsI_09956 [Oryza sativa Indica Group] gb|EAZ25531.1| hypothetical protein OsJ_09355 [Oryza sativa Japonica Group]
isotig00249	isogroup00022	2148	gb|EAY88485.1|	hypothetical protein OsI_09956 [Oryza sativa Indica Group] gb|EAZ25531.1| hypothetical protein OsJ_09355 [Oryza sativa Japonica Group]
isotig00250	isogroup00022	2148	gb|EAY88485.1|	hypothetical protein OsI_09956 [Oryza sativa Indica Group] gb|EAZ25531.1| hypothetical protein OsJ_09355 [Oryza sativa Japonica Group]
isotig00251	isogroup00022	2168	gb|EAY88485.1|	hypothetical protein OsI_09956 [Oryza sativa Indica Group] gb|EAZ25531.1| hypothetical protein OsJ_09355 [Oryza sativa Japonica Group]
isotig00252	isogroup00022	2168	gb|EAY88485.1|	hypothetical protein OsI_09956 [Oryza sativa Indica Group] gb|EAZ25531.1| hypothetical protein OsJ_09355 [Oryza sativa Japonica Group]
isotig00253	isogroup00022	2169	gb|EAY88485.1|	hypothetical protein OsI_09956 [Oryza sativa Indica Group] gb|EAZ25531.1| hypothetical protein OsJ_09355 [Oryza sativa Japonica Group]
isotig00254	isogroup00022	2167	gb|EAY88485.1|	hypothetical protein OsI_09956 [Oryza sativa Indica Group] gb|EAZ25531.1| hypothetical protein OsJ_09355 [Oryza sativa Japonica Group]
isotig00255	isogroup00022	2167	gb|EAY88485.1|	hypothetical protein OsI_09956 [Oryza sativa Indica Group] gb|EAZ25531.1| hypothetical protein OsJ_09355 [Oryza sativa Japonica Group]
isotig00256	isogroup00022	2148	gb|EAY88485.1|	hypothetical protein OsI_09956 [Oryza sativa Indica Group] gb|EAZ25531.1| hypothetical protein OsJ_09355 [Oryza sativa Japonica Group]
isotig00257	isogroup00022	2146	gb|EAY88485.1|	hypothetical protein OsI_09956 [Oryza sativa Indica Group] gb|EAZ25531.1| hypothetical protein OsJ_09355 [Oryza sativa Japonica Group]
isotig00258	isogroup00022	2146	gb|EAY88485.1|	hypothetical protein OsI_09956 [Oryza sativa Indica Group] gb|EAZ25531.1| hypothetical protein OsJ_09355 [Oryza sativa Japonica Group]
isotig00259	isogroup00022	2168	gb|EAY88485.1|	hypothetical protein OsI_09956 [Oryza sativa Indica Group] gb|EAZ25531.1| hypothetical protein OsJ_09355 [Oryza sativa Japonica Group]
isotig00260	isogroup00022	2166	gb|EAY88485.1|	hypothetical protein OsI_09956 [Oryza sativa Indica Group] gb|EAZ25531.1| hypothetical protein OsJ_09355 [Oryza sativa Japonica Group]
isotig00261	isogroup00022	2166	gb|EAY88485.1|	hypothetical protein OsI_09956 [Oryza sativa Indica Group] gb|EAZ25531.1| hypothetical protein OsJ_09355 [Oryza sativa Japonica Group]
isotig00262	isogroup00022	2167	gb|EAY88485.1|	hypothetical protein OsI_09956 [Oryza sativa Indica Group] gb|EAZ25531.1| hypothetical protein OsJ_09355 [Oryza sativa Japonica Group]
isotig00263	isogroup00022	2167	tpg|DAA43306.1|	TPA: beta-amylase [Zea mays]
isotig00264	isogroup00022	2167	tpg|DAA43306.1|	TPA: beta-amylase [Zea mays]
isotig00265	isogroup00022	2169	gb|EAY88485.1|	hypothetical protein OsI_09956 [Oryza sativa Indica Group] gb|EAZ25531.1| hypothetical protein OsJ_09355 [Oryza sativa Japonica Group]
isotig00266	isogroup00022	2169	gb|EAY88485.1|	hypothetical protein OsI_09956 [Oryza sativa Indica Group] gb|EAZ25531.1| hypothetical protein OsJ_09355 [Oryza sativa Japonica Group]
isotig00267	isogroup00022	2146	gb|EAY88485.1|	hypothetical protein OsI_09956 [Oryza sativa Indica Group] gb|EAZ25531.1| hypothetical protein OsJ_09355 [Oryza sativa Japonica Group]
isotig00268	isogroup00022	2166	gb|EAY88485.1|	hypothetical protein OsI_09956 [Oryza sativa Indica Group] gb|EAZ25531.1| hypothetical protein OsJ_09355 [Oryza sativa Japonica Group]
isotig00269	isogroup00022	2148	gb|EAY88485.1|	hypothetical protein OsI_09956 [Oryza sativa Indica Group] gb|EAZ25531.1| hypothetical protein OsJ_09355 [Oryza sativa Japonica Group]
isotig00270	isogroup00022	2166	tpg|DAA43306.1|	TPA: beta-amylase [Zea mays]
isotig00271	isogroup00022	2148	gb|EAY88485.1|	hypothetical protein OsI_09956 [Oryza sativa Indica Group] gb|EAZ25531.1| hypothetical protein OsJ_09355 [Oryza sativa Japonica Group]
isotig00272	isogroup00022	2166	tpg|DAA43306.1|	TPA: beta-amylase [Zea mays]
isotig00273	isogroup00022	2167	tpg|DAA43306.1|	TPA: beta-amylase [Zea mays]
isotig00274	isogroup00022	2165	tpg|DAA43306.1|	TPA: beta-amylase [Zea mays]
isotig00275	isogroup00022	2165	tpg|DAA43306.1|	TPA: beta-amylase [Zea mays]
isotig00276	isogroup00022	2169	gb|EAY88485.1|	hypothetical protein OsI_09956 [Oryza sativa Indica Group] gb|EAZ25531.1| hypothetical protein OsJ_09355 [Oryza sativa Japonica Group]
isotig00277	isogroup00022	2167	gb|EAY88485.1|	hypothetical protein OsI_09956 [Oryza sativa Indica Group] gb|EAZ25531.1| hypothetical protein OsJ_09355 [Oryza sativa Japonica Group]
isotig00278	isogroup00022	2167	gb|EAY88485.1|	hypothetical protein OsI_09956 [Oryza sativa Indica Group] gb|EAZ25531.1| hypothetical protein OsJ_09355 [Oryza sativa Japonica Group]
isotig00279	isogroup00022	2148	gb|EAY88485.1|	hypothetical protein OsI_09956 [Oryza sativa Indica Group] gb|EAZ25531.1| hypothetical protein OsJ_09355 [Oryza sativa Japonica Group]
isotig00280	isogroup00022	2166	tpg|DAA43306.1|	TPA: beta-amylase [Zea mays]
isotig00281	isogroup00022	2146	gb|EAY88485.1|	hypothetical protein OsI_09956 [Oryza sativa Indica Group] gb|EAZ25531.1| hypothetical protein OsJ_09355 [Oryza sativa Japonica Group]
isotig00282	isogroup00022	2164	tpg|DAA43306.1|	TPA: beta-amylase [Zea mays]
isotig00283	isogroup00022	2146	gb|EAY88485.1|	hypothetical protein OsI_09956 [Oryza sativa Indica Group] gb|EAZ25531.1| hypothetical protein OsJ_09355 [Oryza sativa Japonica Group]
isotig00284	isogroup00022	2164	tpg|DAA43306.1|	TPA: beta-amylase [Zea mays]
isotig00285	isogroup00022	2165	tpg|DAA43306.1|	TPA: beta-amylase [Zea mays]
isotig00286	isogroup00022	2167	gb|EAY88485.1|	hypothetical protein OsI_09956 [Oryza sativa Indica Group] gb|EAZ25531.1| hypothetical protein OsJ_09355 [Oryza sativa Japonica Group]
isotig00287	isogroup00022	2167	tpg|DAA43306.1|	TPA: beta-amylase [Zea mays]
isotig00288	isogroup00022	2167	tpg|DAA43306.1|	TPA: beta-amylase [Zea mays]
isotig00289	isogroup00022	2146	gb|EAY88485.1|	hypothetical protein OsI_09956 [Oryza sativa Indica Group] gb|EAZ25531.1| hypothetical protein OsJ_09355 [Oryza sativa Japonica Group]
isotig00290	isogroup00022	2164	tpg|DAA43306.1|	TPA: beta-amylase [Zea mays]
isotig00291	isogroup00022	2166	tpg|DAA43306.1|	TPA: beta-amylase [Zea mays]
isotig00292	isogroup00022	2166	tpg|DAA43306.1|	TPA: beta-amylase [Zea mays]
isotig00293	isogroup00022	2167	tpg|DAA43306.1|	TPA: beta-amylase [Zea mays]
isotig00294	isogroup00022	2165	tpg|DAA43306.1|	TPA: beta-amylase [Zea mays]
isotig00295	isogroup00022	2165	tpg|DAA43306.1|	TPA: beta-amylase [Zea mays]
isotig00296	isogroup00022	2166	tpg|DAA43306.1|	TPA: beta-amylase [Zea mays]
isotig00297	isogroup00022	2164	tpg|DAA43306.1|	TPA: beta-amylase [Zea mays]
isotig00298	isogroup00022	2164	tpg|DAA43306.1|	TPA: beta-amylase [Zea mays]
isotig00299	isogroup00022	2165	tpg|DAA43306.1|	TPA: beta-amylase [Zea mays]
isotig00300	isogroup00022	2168	gb|EAY88485.1|	hypothetical protein OsI_09956 [Oryza sativa Indica Group] gb|EAZ25531.1| hypothetical protein OsJ_09355 [Oryza sativa Japonica Group]
isotig00301	isogroup00022	2168	gb|EAY88485.1|	hypothetical protein OsI_09956 [Oryza sativa Indica Group] gb|EAZ25531.1| hypothetical protein OsJ_09355 [Oryza sativa Japonica Group]
isotig00302	isogroup00022	2164	tpg|DAA43306.1|	TPA: beta-amylase [Zea mays]
isotig00303	isogroup00022	2168	gb|EAY88485.1|	hypothetical protein OsI_09956 [Oryza sativa Indica Group] gb|EAZ25531.1| hypothetical protein OsJ_09355 [Oryza sativa Japonica Group]
isotig00304	isogroup00022	2169	gb|EAY88485.1|	hypothetical protein OsI_09956 [Oryza sativa Indica Group] gb|EAZ25531.1| hypothetical protein OsJ_09355 [Oryza sativa Japonica Group]
isotig00305	isogroup00022	2169	gb|EAY88485.1|	hypothetical protein OsI_09956 [Oryza sativa Indica Group] gb|EAZ25531.1| hypothetical protein OsJ_09355 [Oryza sativa Japonica Group]
isotig00306	isogroup00022	2148	gb|EAY88485.1|	hypothetical protein OsI_09956 [Oryza sativa Indica Group] gb|EAZ25531.1| hypothetical protein OsJ_09355 [Oryza sativa Japonica Group]
isotig00307	isogroup00022	2148	gb|EAY88485.1|	hypothetical protein OsI_09956 [Oryza sativa Indica Group] gb|EAZ25531.1| hypothetical protein OsJ_09355 [Oryza sativa Japonica Group]
isotig00308	isogroup00022	2169	gb|EAY88485.1|	hypothetical protein OsI_09956 [Oryza sativa Indica Group] gb|EAZ25531.1| hypothetical protein OsJ_09355 [Oryza sativa Japonica Group]
isotig00309	isogroup00022	2148	gb|EAY88485.1|	hypothetical protein OsI_09956 [Oryza sativa Indica Group] gb|EAZ25531.1| hypothetical protein OsJ_09355 [Oryza sativa Japonica Group]
isotig00310	isogroup00022	2161	gb|EAY88485.1|	hypothetical protein OsI_09956 [Oryza sativa Indica Group] gb|EAZ25531.1| hypothetical protein OsJ_09355 [Oryza sativa Japonica Group]
isotig00311	isogroup00022	2167	tpg|DAA43306.1|	TPA: beta-amylase [Zea mays]
isotig00312	isogroup00022	2167	tpg|DAA43306.1|	TPA: beta-amylase [Zea mays]
isotig00313	isogroup00022	2161	gb|EAY88485.1|	hypothetical protein OsI_09956 [Oryza sativa Indica Group] gb|EAZ25531.1| hypothetical protein OsJ_09355 [Oryza sativa Japonica Group]
isotig00314	isogroup00022	2166	tpg|DAA43306.1|	TPA: beta-amylase [Zea mays]
isotig00315	isogroup00022	2166	tpg|DAA43306.1|	TPA: beta-amylase [Zea mays]
isotig00316	isogroup00022	2167	tpg|DAA43306.1|	TPA: beta-amylase [Zea mays]
isotig00317	isogroup00022	2162	gb|EAY88485.1|	hypothetical protein OsI_09956 [Oryza sativa Indica Group] gb|EAZ25531.1| hypothetical protein OsJ_09355 [Oryza sativa Japonica Group]
isotig00318	isogroup00022	2166	tpg|DAA43306.1|	TPA: beta-amylase [Zea mays]
isotig00319	isogroup00022	2162	gb|EAY88485.1|	hypothetical protein OsI_09956 [Oryza sativa Indica Group] gb|EAZ25531.1| hypothetical protein OsJ_09355 [Oryza sativa Japonica Group]
isotig00320	isogroup00022	2141	gb|EAY88485.1|	hypothetical protein OsI_09956 [Oryza sativa Indica Group] gb|EAZ25531.1| hypothetical protein OsJ_09355 [Oryza sativa Japonica Group]
isotig00321	isogroup00022	2141	gb|EAY88485.1|	hypothetical protein OsI_09956 [Oryza sativa Indica Group] gb|EAZ25531.1| hypothetical protein OsJ_09355 [Oryza sativa Japonica Group]
isotig00322	isogroup00022	2160	tpg|DAA43306.1|	TPA: beta-amylase [Zea mays]
isotig00323	isogroup00022	2160	tpg|DAA43306.1|	TPA: beta-amylase [Zea mays]
isotig00324	isogroup00022	2159	tpg|DAA43306.1|	TPA: beta-amylase [Zea mays]
isotig00325	isogroup00022	2159	tpg|DAA43306.1|	TPA: beta-amylase [Zea mays]
isotig00326	isogroup00023	1680	ref|NP_001042761.1|	Os01g0282800 [Oryza sativa Japonica Group] sp|Q43594.2|TBB1_ORYSJ RecName: Full=Tubulin beta-1 chain; AltName: Full=Beta-1-tubulin dbj|BAB39951.1| putative tubulin beta-4 chain [Oryza sativa Japonica Group] dbj|BAB64211.1| putative beta-tubulin 4 [Oryza sativa Japonica Group] dbj|BAF04675.1| Os01g0282800 [Oryza sativa Japonica Group] gb|EAY73543.1| hypothetical protein OsI_01426 [Oryza sativa Ind…
isotig00327	isogroup00023	1680	ref|NP_001042761.1|	Os01g0282800 [Oryza sativa Japonica Group] sp|Q43594.2|TBB1_ORYSJ RecName: Full=Tubulin beta-1 chain; AltName: Full=Beta-1-tubulin dbj|BAB39951.1| putative tubulin beta-4 chain [Oryza sativa Japonica Group] dbj|BAB64211.1| putative beta-tubulin 4 [Oryza sativa Japonica Group] dbj|BAF04675.1| Os01g0282800 [Oryza sativa Japonica Group] gb|EAY73543.1| hypothetical protein OsI_01426 [Oryza sativa Ind…
isotig00328	isogroup00023	1680	ref|NP_001042761.1|	Os01g0282800 [Oryza sativa Japonica Group] sp|Q43594.2|TBB1_ORYSJ RecName: Full=Tubulin beta-1 chain; AltName: Full=Beta-1-tubulin dbj|BAB39951.1| putative tubulin beta-4 chain [Oryza sativa Japonica Group] dbj|BAB64211.1| putative beta-tubulin 4 [Oryza sativa Japonica Group] dbj|BAF04675.1| Os01g0282800 [Oryza sativa Japonica Group] gb|EAY73543.1| hypothetical protein OsI_01426 [Oryza sativa Ind…
isotig00329	isogroup00023	1680	ref|NP_001042761.1|	Os01g0282800 [Oryza sativa Japonica Group] sp|Q43594.2|TBB1_ORYSJ RecName: Full=Tubulin beta-1 chain; AltName: Full=Beta-1-tubulin dbj|BAB39951.1| putative tubulin beta-4 chain [Oryza sativa Japonica Group] dbj|BAB64211.1| putative beta-tubulin 4 [Oryza sativa Japonica Group] dbj|BAF04675.1| Os01g0282800 [Oryza sativa Japonica Group] gb|EAY73543.1| hypothetical protein OsI_01426 [Oryza sativa Ind…
isotig00330	isogroup00023	1680	ref|NP_001042761.1|	Os01g0282800 [Oryza sativa Japonica Group] sp|Q43594.2|TBB1_ORYSJ RecName: Full=Tubulin beta-1 chain; AltName: Full=Beta-1-tubulin dbj|BAB39951.1| putative tubulin beta-4 chain [Oryza sativa Japonica Group] dbj|BAB64211.1| putative beta-tubulin 4 [Oryza sativa Japonica Group] dbj|BAF04675.1| Os01g0282800 [Oryza sativa Japonica Group] gb|EAY73543.1| hypothetical protein OsI_01426 [Oryza sativa Ind…
isotig00331	isogroup00023	1679	ref|NP_001042761.1|	Os01g0282800 [Oryza sativa Japonica Group] sp|Q43594.2|TBB1_ORYSJ RecName: Full=Tubulin beta-1 chain; AltName: Full=Beta-1-tubulin dbj|BAB39951.1| putative tubulin beta-4 chain [Oryza sativa Japonica Group] dbj|BAB64211.1| putative beta-tubulin 4 [Oryza sativa Japonica Group] dbj|BAF04675.1| Os01g0282800 [Oryza sativa Japonica Group] gb|EAY73543.1| hypothetical protein OsI_01426 [Oryza sativa Ind…
isotig00332	isogroup00023	1680	ref|NP_001042761.1|	Os01g0282800 [Oryza sativa Japonica Group] sp|Q43594.2|TBB1_ORYSJ RecName: Full=Tubulin beta-1 chain; AltName: Full=Beta-1-tubulin dbj|BAB39951.1| putative tubulin beta-4 chain [Oryza sativa Japonica Group] dbj|BAB64211.1| putative beta-tubulin 4 [Oryza sativa Japonica Group] dbj|BAF04675.1| Os01g0282800 [Oryza sativa Japonica Group] gb|EAY73543.1| hypothetical protein OsI_01426 [Oryza sativa Ind…
isotig00333	isogroup00023	1679	ref|NP_001042761.1|	Os01g0282800 [Oryza sativa Japonica Group] sp|Q43594.2|TBB1_ORYSJ RecName: Full=Tubulin beta-1 chain; AltName: Full=Beta-1-tubulin dbj|BAB39951.1| putative tubulin beta-4 chain [Oryza sativa Japonica Group] dbj|BAB64211.1| putative beta-tubulin 4 [Oryza sativa Japonica Group] dbj|BAF04675.1| Os01g0282800 [Oryza sativa Japonica Group] gb|EAY73543.1| hypothetical protein OsI_01426 [Oryza sativa Ind…
isotig00334	isogroup00023	1680	ref|NP_001042761.1|	Os01g0282800 [Oryza sativa Japonica Group] sp|Q43594.2|TBB1_ORYSJ RecName: Full=Tubulin beta-1 chain; AltName: Full=Beta-1-tubulin dbj|BAB39951.1| putative tubulin beta-4 chain [Oryza sativa Japonica Group] dbj|BAB64211.1| putative beta-tubulin 4 [Oryza sativa Japonica Group] dbj|BAF04675.1| Os01g0282800 [Oryza sativa Japonica Group] gb|EAY73543.1| hypothetical protein OsI_01426 [Oryza sativa Ind…
isotig00335	isogroup00023	1679	ref|NP_001042761.1|	Os01g0282800 [Oryza sativa Japonica Group] sp|Q43594.2|TBB1_ORYSJ RecName: Full=Tubulin beta-1 chain; AltName: Full=Beta-1-tubulin dbj|BAB39951.1| putative tubulin beta-4 chain [Oryza sativa Japonica Group] dbj|BAB64211.1| putative beta-tubulin 4 [Oryza sativa Japonica Group] dbj|BAF04675.1| Os01g0282800 [Oryza sativa Japonica Group] gb|EAY73543.1| hypothetical protein OsI_01426 [Oryza sativa Ind…
isotig00336	isogroup00023	1680	ref|NP_001042761.1|	Os01g0282800 [Oryza sativa Japonica Group] sp|Q43594.2|TBB1_ORYSJ RecName: Full=Tubulin beta-1 chain; AltName: Full=Beta-1-tubulin dbj|BAB39951.1| putative tubulin beta-4 chain [Oryza sativa Japonica Group] dbj|BAB64211.1| putative beta-tubulin 4 [Oryza sativa Japonica Group] dbj|BAF04675.1| Os01g0282800 [Oryza sativa Japonica Group] gb|EAY73543.1| hypothetical protein OsI_01426 [Oryza sativa Ind…
isotig00337	isogroup00023	1679	ref|NP_001042761.1|	Os01g0282800 [Oryza sativa Japonica Group] sp|Q43594.2|TBB1_ORYSJ RecName: Full=Tubulin beta-1 chain; AltName: Full=Beta-1-tubulin dbj|BAB39951.1| putative tubulin beta-4 chain [Oryza sativa Japonica Group] dbj|BAB64211.1| putative beta-tubulin 4 [Oryza sativa Japonica Group] dbj|BAF04675.1| Os01g0282800 [Oryza sativa Japonica Group] gb|EAY73543.1| hypothetical protein OsI_01426 [Oryza sativa Ind…
isotig00338	isogroup00023	1679	ref|NP_001042761.1|	Os01g0282800 [Oryza sativa Japonica Group] sp|Q43594.2|TBB1_ORYSJ RecName: Full=Tubulin beta-1 chain; AltName: Full=Beta-1-tubulin dbj|BAB39951.1| putative tubulin beta-4 chain [Oryza sativa Japonica Group] dbj|BAB64211.1| putative beta-tubulin 4 [Oryza sativa Japonica Group] dbj|BAF04675.1| Os01g0282800 [Oryza sativa Japonica Group] gb|EAY73543.1| hypothetical protein OsI_01426 [Oryza sativa Ind…
isotig00339	isogroup00023	1679	ref|NP_001042761.1|	Os01g0282800 [Oryza sativa Japonica Group] sp|Q43594.2|TBB1_ORYSJ RecName: Full=Tubulin beta-1 chain; AltName: Full=Beta-1-tubulin dbj|BAB39951.1| putative tubulin beta-4 chain [Oryza sativa Japonica Group] dbj|BAB64211.1| putative beta-tubulin 4 [Oryza sativa Japonica Group] dbj|BAF04675.1| Os01g0282800 [Oryza sativa Japonica Group] gb|EAY73543.1| hypothetical protein OsI_01426 [Oryza sativa Ind…
isotig00340	isogroup00023	1679	ref|NP_001042761.1|	Os01g0282800 [Oryza sativa Japonica Group] sp|Q43594.2|TBB1_ORYSJ RecName: Full=Tubulin beta-1 chain; AltName: Full=Beta-1-tubulin dbj|BAB39951.1| putative tubulin beta-4 chain [Oryza sativa Japonica Group] dbj|BAB64211.1| putative beta-tubulin 4 [Oryza sativa Japonica Group] dbj|BAF04675.1| Os01g0282800 [Oryza sativa Japonica Group] gb|EAY73543.1| hypothetical protein OsI_01426 [Oryza sativa Ind…
isotig00341	isogroup00023	1679	ref|NP_001042761.1|	Os01g0282800 [Oryza sativa Japonica Group] sp|Q43594.2|TBB1_ORYSJ RecName: Full=Tubulin beta-1 chain; AltName: Full=Beta-1-tubulin dbj|BAB39951.1| putative tubulin beta-4 chain [Oryza sativa Japonica Group] dbj|BAB64211.1| putative beta-tubulin 4 [Oryza sativa Japonica Group] dbj|BAF04675.1| Os01g0282800 [Oryza sativa Japonica Group] gb|EAY73543.1| hypothetical protein OsI_01426 [Oryza sativa Ind…
isotig00342	isogroup00023	1679	ref|NP_001042761.1|	Os01g0282800 [Oryza sativa Japonica Group] sp|Q43594.2|TBB1_ORYSJ RecName: Full=Tubulin beta-1 chain; AltName: Full=Beta-1-tubulin dbj|BAB39951.1| putative tubulin beta-4 chain [Oryza sativa Japonica Group] dbj|BAB64211.1| putative beta-tubulin 4 [Oryza sativa Japonica Group] dbj|BAF04675.1| Os01g0282800 [Oryza sativa Japonica Group] gb|EAY73543.1| hypothetical protein OsI_01426 [Oryza sativa Ind…
isotig00343	isogroup00023	1679	ref|NP_001042761.1|	Os01g0282800 [Oryza sativa Japonica Group] sp|Q43594.2|TBB1_ORYSJ RecName: Full=Tubulin beta-1 chain; AltName: Full=Beta-1-tubulin dbj|BAB39951.1| putative tubulin beta-4 chain [Oryza sativa Japonica Group] dbj|BAB64211.1| putative beta-tubulin 4 [Oryza sativa Japonica Group] dbj|BAF04675.1| Os01g0282800 [Oryza sativa Japonica Group] gb|EAY73543.1| hypothetical protein OsI_01426 [Oryza sativa Ind…
isotig00344	isogroup00023	1691	ref|NP_001140291.1|	uncharacterized protein LOC100272336 [Zea mays] gb|ACN28163.1| unknown [Zea mays]
isotig00345	isogroup00023	1691	ref|NP_001140291.1|	uncharacterized protein LOC100272336 [Zea mays] gb|ACN28163.1| unknown [Zea mays]
isotig00346	isogroup00023	1679	ref|NP_001042761.1|	Os01g0282800 [Oryza sativa Japonica Group] sp|Q43594.2|TBB1_ORYSJ RecName: Full=Tubulin beta-1 chain; AltName: Full=Beta-1-tubulin dbj|BAB39951.1| putative tubulin beta-4 chain [Oryza sativa Japonica Group] dbj|BAB64211.1| putative beta-tubulin 4 [Oryza sativa Japonica Group] dbj|BAF04675.1| Os01g0282800 [Oryza sativa Japonica Group] gb|EAY73543.1| hypothetical protein OsI_01426 [Oryza sativa Ind…
isotig00347	isogroup00023	1691	ref|NP_001140291.1|	uncharacterized protein LOC100272336 [Zea mays] gb|ACN28163.1| unknown [Zea mays]
isotig00348	isogroup00023	1679	ref|NP_001042761.1|	Os01g0282800 [Oryza sativa Japonica Group] sp|Q43594.2|TBB1_ORYSJ RecName: Full=Tubulin beta-1 chain; AltName: Full=Beta-1-tubulin dbj|BAB39951.1| putative tubulin beta-4 chain [Oryza sativa Japonica Group] dbj|BAB64211.1| putative beta-tubulin 4 [Oryza sativa Japonica Group] dbj|BAF04675.1| Os01g0282800 [Oryza sativa Japonica Group] gb|EAY73543.1| hypothetical protein OsI_01426 [Oryza sativa Ind…
isotig00349	isogroup00023	1691	ref|NP_001140291.1|	uncharacterized protein LOC100272336 [Zea mays] gb|ACN28163.1| unknown [Zea mays]
isotig00350	isogroup00023	1690	ref|NP_001140291.1|	uncharacterized protein LOC100272336 [Zea mays] gb|ACN28163.1| unknown [Zea mays]
isotig00351	isogroup00023	1679	ref|NP_001042761.1|	Os01g0282800 [Oryza sativa Japonica Group] sp|Q43594.2|TBB1_ORYSJ RecName: Full=Tubulin beta-1 chain; AltName: Full=Beta-1-tubulin dbj|BAB39951.1| putative tubulin beta-4 chain [Oryza sativa Japonica Group] dbj|BAB64211.1| putative beta-tubulin 4 [Oryza sativa Japonica Group] dbj|BAF04675.1| Os01g0282800 [Oryza sativa Japonica Group] gb|EAY73543.1| hypothetical protein OsI_01426 [Oryza sativa Ind…
isotig00352	isogroup00023	1690	ref|NP_001140291.1|	uncharacterized protein LOC100272336 [Zea mays] gb|ACN28163.1| unknown [Zea mays]
isotig00353	isogroup00023	1690	ref|NP_001140291.1|	uncharacterized protein LOC100272336 [Zea mays] gb|ACN28163.1| unknown [Zea mays]
isotig00354	isogroup00023	1690	ref|NP_001140291.1|	uncharacterized protein LOC100272336 [Zea mays] gb|ACN28163.1| unknown [Zea mays]
isotig00355	isogroup00023	1679	ref|NP_001042761.1|	Os01g0282800 [Oryza sativa Japonica Group] sp|Q43594.2|TBB1_ORYSJ RecName: Full=Tubulin beta-1 chain; AltName: Full=Beta-1-tubulin dbj|BAB39951.1| putative tubulin beta-4 chain [Oryza sativa Japonica Group] dbj|BAB64211.1| putative beta-tubulin 4 [Oryza sativa Japonica Group] dbj|BAF04675.1| Os01g0282800 [Oryza sativa Japonica Group] gb|EAY73543.1| hypothetical protein OsI_01426 [Oryza sativa Ind…
isotig00356	isogroup00023	1690	ref|NP_001140291.1|	uncharacterized protein LOC100272336 [Zea mays] gb|ACN28163.1| unknown [Zea mays]
isotig00357	isogroup00023	1690	ref|NP_001140291.1|	uncharacterized protein LOC100272336 [Zea mays] gb|ACN28163.1| unknown [Zea mays]
isotig00358	isogroup00023	1679	ref|NP_001042761.1|	Os01g0282800 [Oryza sativa Japonica Group] sp|Q43594.2|TBB1_ORYSJ RecName: Full=Tubulin beta-1 chain; AltName: Full=Beta-1-tubulin dbj|BAB39951.1| putative tubulin beta-4 chain [Oryza sativa Japonica Group] dbj|BAB64211.1| putative beta-tubulin 4 [Oryza sativa Japonica Group] dbj|BAF04675.1| Os01g0282800 [Oryza sativa Japonica Group] gb|EAY73543.1| hypothetical protein OsI_01426 [Oryza sativa Ind…
isotig00359	isogroup00023	1679	ref|NP_001042761.1|	Os01g0282800 [Oryza sativa Japonica Group] sp|Q43594.2|TBB1_ORYSJ RecName: Full=Tubulin beta-1 chain; AltName: Full=Beta-1-tubulin dbj|BAB39951.1| putative tubulin beta-4 chain [Oryza sativa Japonica Group] dbj|BAB64211.1| putative beta-tubulin 4 [Oryza sativa Japonica Group] dbj|BAF04675.1| Os01g0282800 [Oryza sativa Japonica Group] gb|EAY73543.1| hypothetical protein OsI_01426 [Oryza sativa Ind…
isotig00360	isogroup00023	1690	ref|NP_001140291.1|	uncharacterized protein LOC100272336 [Zea mays] gb|ACN28163.1| unknown [Zea mays]
isotig00361	isogroup00023	1690	ref|NP_001140291.1|	uncharacterized protein LOC100272336 [Zea mays] gb|ACN28163.1| unknown [Zea mays]
isotig00362	isogroup00023	1842	gb|ACN34238.1|	unknown [Zea mays] tpg|DAA56758.1| TPA: zn-finger, RanBP-type, containing protein [Zea mays]
isotig00363	isogroup00023	1843	gb|ACN34238.1|	unknown [Zea mays] tpg|DAA56758.1| TPA: zn-finger, RanBP-type, containing protein [Zea mays]
isotig00364	isogroup00023	1663	sp|Q9ZPN7.1|TBB4_ELEIN	RecName: Full=Tubulin beta-4 chain; AltName: Full=Beta-4-tubulin gb|AAD20181.1| beta-tubulin 4 [Eleusine indica]
isotig00365	isogroup00023	942
isotig00366	isogroup00023	892
isotig00367	isogroup00026	3867	gb|AFW66201.1|	hypothetical protein ZEAMMB73_188530 [Zea mays]
isotig00368	isogroup00026	3867	gb|AFW66201.1|	hypothetical protein ZEAMMB73_188530 [Zea mays]
isotig00369	isogroup00026	3867	gb|AFW66201.1|	hypothetical protein ZEAMMB73_188530 [Zea mays]
isotig00370	isogroup00026	3771	gb|AFW66201.1|	hypothetical protein ZEAMMB73_188530 [Zea mays]
isotig00371	isogroup00026	3867	gb|AFW66201.1|	hypothetical protein ZEAMMB73_188530 [Zea mays]
isotig00372	isogroup00026	3771	gb|AFW66201.1|	hypothetical protein ZEAMMB73_188530 [Zea mays]
isotig00373	isogroup00026	3867	gb|AFW66201.1|	hypothetical protein ZEAMMB73_188530 [Zea mays]
isotig00374	isogroup00026	3771	gb|AFW66201.1|	hypothetical protein ZEAMMB73_188530 [Zea mays]
isotig00375	isogroup00026	3867	gb|AFW66201.1|	hypothetical protein ZEAMMB73_188530 [Zea mays]
isotig00376	isogroup00026	3771	gb|AFW66201.1|	hypothetical protein ZEAMMB73_188530 [Zea mays]
isotig00377	isogroup00026	3771	gb|AFW66201.1|	hypothetical protein ZEAMMB73_188530 [Zea mays]
isotig00378	isogroup00026	3771	gb|AFW66201.1|	hypothetical protein ZEAMMB73_188530 [Zea mays]
isotig00379	isogroup00026	3638	gb|AFW66201.1|	hypothetical protein ZEAMMB73_188530 [Zea mays]
isotig00380	isogroup00026	3690	gb|AFW66201.1|	hypothetical protein ZEAMMB73_188530 [Zea mays]
isotig00381	isogroup00026	3638	gb|AFW66201.1|	hypothetical protein ZEAMMB73_188530 [Zea mays]
isotig00382	isogroup00026	3638	gb|AFW66201.1|	hypothetical protein ZEAMMB73_188530 [Zea mays]
isotig00383	isogroup00026	3690	gb|AFW66201.1|	hypothetical protein ZEAMMB73_188530 [Zea mays]
isotig00384	isogroup00026	3542	gb|AFW66201.1|	hypothetical protein ZEAMMB73_188530 [Zea mays]
isotig00385	isogroup00026	3638	gb|AFW66201.1|	hypothetical protein ZEAMMB73_188530 [Zea mays]
isotig00386	isogroup00026	3594	gb|AFW66201.1|	hypothetical protein ZEAMMB73_188530 [Zea mays]
isotig00387	isogroup00026	3542	gb|AFW66201.1|	hypothetical protein ZEAMMB73_188530 [Zea mays]
isotig00388	isogroup00026	3638	gb|AFW66201.1|	hypothetical protein ZEAMMB73_188530 [Zea mays]
isotig00389	isogroup00026	3542	gb|AFW66201.1|	hypothetical protein ZEAMMB73_188530 [Zea mays]
isotig00390	isogroup00026	3638	gb|AFW66201.1|	hypothetical protein ZEAMMB73_188530 [Zea mays]
isotig00391	isogroup00026	3594	gb|AFW66201.1|	hypothetical protein ZEAMMB73_188530 [Zea mays]
isotig00392	isogroup00026	3542	gb|AFW66201.1|	hypothetical protein ZEAMMB73_188530 [Zea mays]
isotig00393	isogroup00026	3542	gb|AFW66201.1|	hypothetical protein ZEAMMB73_188530 [Zea mays]
isotig00394	isogroup00026	3542	gb|AFW66201.1|	hypothetical protein ZEAMMB73_188530 [Zea mays]
isotig00395	isogroup00026	3241	gb|AFW66201.1|	hypothetical protein ZEAMMB73_188530 [Zea mays]
isotig00396	isogroup00026	3277	gb|AFW66201.1|	hypothetical protein ZEAMMB73_188530 [Zea mays]
isotig00397	isogroup00026	3234	gb|AFW66201.1|	hypothetical protein ZEAMMB73_188530 [Zea mays]
isotig00398	isogroup00026	3241	gb|AFW66201.1|	hypothetical protein ZEAMMB73_188530 [Zea mays]
isotig00399	isogroup00026	3277	gb|AFW66201.1|	hypothetical protein ZEAMMB73_188530 [Zea mays]
isotig00400	isogroup00026	3234	gb|AFW66201.1|	hypothetical protein ZEAMMB73_188530 [Zea mays]
isotig00401	isogroup00026	3241	gb|AFW66201.1|	hypothetical protein ZEAMMB73_188530 [Zea mays]
isotig00402	isogroup00026	3277	gb|AFW66201.1|	hypothetical protein ZEAMMB73_188530 [Zea mays]
isotig00403	isogroup00026	3234	gb|AFW66201.1|	hypothetical protein ZEAMMB73_188530 [Zea mays]
isotig00404	isogroup00026	3277	gb|AFW66201.1|	hypothetical protein ZEAMMB73_188530 [Zea mays]
isotig00405	isogroup00026	3277	gb|AFW66201.1|	hypothetical protein ZEAMMB73_188530 [Zea mays]
isotig00406	isogroup00026	3277	gb|AFW66201.1|	hypothetical protein ZEAMMB73_188530 [Zea mays]
isotig00407	isogroup00026	3241	gb|AFW66201.1|	hypothetical protein ZEAMMB73_188530 [Zea mays]
isotig00408	isogroup00026	3277	gb|AFW66201.1|	hypothetical protein ZEAMMB73_188530 [Zea mays]
isotig00409	isogroup00026	3234	gb|AFW66201.1|	hypothetical protein ZEAMMB73_188530 [Zea mays]
isotig00410	isogroup00026	3241	gb|AFW66201.1|	hypothetical protein ZEAMMB73_188530 [Zea mays]
isotig00411	isogroup00026	3277	gb|AFW66201.1|	hypothetical protein ZEAMMB73_188530 [Zea mays]
isotig00412	isogroup00026	3234	gb|AFW66201.1|	hypothetical protein ZEAMMB73_188530 [Zea mays]
isotig00413	isogroup00026	3241	gb|AFW66201.1|	hypothetical protein ZEAMMB73_188530 [Zea mays]
isotig00414	isogroup00026	3277	gb|AFW66201.1|	hypothetical protein ZEAMMB73_188530 [Zea mays]
isotig00415	isogroup00026	3234	gb|AFW66201.1|	hypothetical protein ZEAMMB73_188530 [Zea mays]
isotig00416	isogroup00026	3277	gb|AFW66201.1|	hypothetical protein ZEAMMB73_188530 [Zea mays]
isotig00417	isogroup00026	3277	gb|AFW66201.1|	hypothetical protein ZEAMMB73_188530 [Zea mays]
isotig00418	isogroup00026	3277	gb|AFW66201.1|	hypothetical protein ZEAMMB73_188530 [Zea mays]
isotig00419	isogroup00026	3012	gb|AFW66201.1|	hypothetical protein ZEAMMB73_188530 [Zea mays]
isotig00420	isogroup00026	3048	gb|AFW66201.1|	hypothetical protein ZEAMMB73_188530 [Zea mays]
isotig00421	isogroup00026	3005	gb|AFW66201.1|	hypothetical protein ZEAMMB73_188530 [Zea mays]
isotig00422	isogroup00026	3064	gb|AFW66201.1|	hypothetical protein ZEAMMB73_188530 [Zea mays]
isotig00423	isogroup00026	3100	gb|AFW66201.1|	hypothetical protein ZEAMMB73_188530 [Zea mays]
isotig00424	isogroup00026	3012	gb|AFW66201.1|	hypothetical protein ZEAMMB73_188530 [Zea mays]
isotig00425	isogroup00026	3057	gb|AFW66201.1|	hypothetical protein ZEAMMB73_188530 [Zea mays]
isotig00426	isogroup00026	3048	gb|AFW66201.1|	hypothetical protein ZEAMMB73_188530 [Zea mays]
isotig00427	isogroup00026	3005	gb|AFW66201.1|	hypothetical protein ZEAMMB73_188530 [Zea mays]
isotig00428	isogroup00026	3012	gb|AFW66201.1|	hypothetical protein ZEAMMB73_188530 [Zea mays]
isotig00429	isogroup00026	3048	gb|AFW66201.1|	hypothetical protein ZEAMMB73_188530 [Zea mays]
isotig00430	isogroup00026	3064	gb|AFW66201.1|	hypothetical protein ZEAMMB73_188530 [Zea mays]
isotig00431	isogroup00026	3005	gb|AFW66201.1|	hypothetical protein ZEAMMB73_188530 [Zea mays]
isotig00432	isogroup00026	3100	gb|AFW66201.1|	hypothetical protein ZEAMMB73_188530 [Zea mays]
isotig00433	isogroup00026	3057	gb|AFW66201.1|	hypothetical protein ZEAMMB73_188530 [Zea mays]
isotig00434	isogroup00026	3048	gb|AFW66201.1|	hypothetical protein ZEAMMB73_188530 [Zea mays]
isotig00435	isogroup00026	3100	gb|AFW66201.1|	hypothetical protein ZEAMMB73_188530 [Zea mays]
isotig00436	isogroup00026	3048	gb|AFW66201.1|	hypothetical protein ZEAMMB73_188530 [Zea mays]
isotig00437	isogroup00026	3048	gb|AFW66201.1|	hypothetical protein ZEAMMB73_188530 [Zea mays]
isotig00438	isogroup00026	3100	gb|AFW66201.1|	hypothetical protein ZEAMMB73_188530 [Zea mays]
isotig00439	isogroup00026	3012	gb|AFW66201.1|	hypothetical protein ZEAMMB73_188530 [Zea mays]
isotig00440	isogroup00026	3048	gb|AFW66201.1|	hypothetical protein ZEAMMB73_188530 [Zea mays]
isotig00441	isogroup00026	3005	gb|AFW66201.1|	hypothetical protein ZEAMMB73_188530 [Zea mays]
isotig00442	isogroup00026	3012	gb|AFW66201.1|	hypothetical protein ZEAMMB73_188530 [Zea mays]
isotig00443	isogroup00026	3048	gb|AFW66201.1|	hypothetical protein ZEAMMB73_188530 [Zea mays]
isotig00444	isogroup00026	3005	gb|AFW66201.1|	hypothetical protein ZEAMMB73_188530 [Zea mays]
isotig00445	isogroup00026	3012	gb|AFW66201.1|	hypothetical protein ZEAMMB73_188530 [Zea mays]
isotig00446	isogroup00026	3048	gb|AFW66201.1|	hypothetical protein ZEAMMB73_188530 [Zea mays]
isotig00447	isogroup00026	3005	gb|AFW66201.1|	hypothetical protein ZEAMMB73_188530 [Zea mays]
isotig00448	isogroup00026	3048	gb|AFW66201.1|	hypothetical protein ZEAMMB73_188530 [Zea mays]
isotig00449	isogroup00026	3048	gb|AFW66201.1|	hypothetical protein ZEAMMB73_188530 [Zea mays]
isotig00450	isogroup00026	3048	gb|AFW66201.1|	hypothetical protein ZEAMMB73_188530 [Zea mays]
isotig00451	isogroup00026	1863	gb|AFW66200.1|	hypothetical protein ZEAMMB73_188530 [Zea mays]
isotig00452	isogroup00026	1863	gb|AFW66200.1|	hypothetical protein ZEAMMB73_188530 [Zea mays]
isotig00453	isogroup00026	1634	gb|AFW66201.1|	hypothetical protein ZEAMMB73_188530 [Zea mays]
isotig00454	isogroup00026	1634	gb|AFW66201.1|	hypothetical protein ZEAMMB73_188530 [Zea mays]
isotig00455	isogroup00027	2842	ref|XP_002459430.1|	hypothetical protein SORBIDRAFT_02g004550 [Sorghum bicolor] gb|EER95951.1| hypothetical protein SORBIDRAFT_02g004550 [Sorghum bicolor]
isotig00456	isogroup00027	2857	gb|AFW67306.1|	hypothetical protein ZEAMMB73_194510, partial [Zea mays]
isotig00457	isogroup00027	2809	gb|AFW67306.1|	hypothetical protein ZEAMMB73_194510, partial [Zea mays]
isotig00458	isogroup00027	2763	ref|XP_002456539.1|	hypothetical protein SORBIDRAFT_03g038070 [Sorghum bicolor] gb|EES01659.1| hypothetical protein SORBIDRAFT_03g038070 [Sorghum bicolor]
isotig00459	isogroup00027	2719	ref|XP_002459430.1|	hypothetical protein SORBIDRAFT_02g004550 [Sorghum bicolor] gb|EER95951.1| hypothetical protein SORBIDRAFT_02g004550 [Sorghum bicolor]
isotig00460	isogroup00027	2728	ref|XP_002456539.1|	hypothetical protein SORBIDRAFT_03g038070 [Sorghum bicolor] gb|EES01659.1| hypothetical protein SORBIDRAFT_03g038070 [Sorghum bicolor]
isotig00461	isogroup00027	2715	ref|XP_002456539.1|	hypothetical protein SORBIDRAFT_03g038070 [Sorghum bicolor] gb|EES01659.1| hypothetical protein SORBIDRAFT_03g038070 [Sorghum bicolor]
isotig00462	isogroup00027	2687	gb|AAS07235.1|	putative galactosyltransferase, 3'-partial [Oryza sativa Japonica Group]
isotig00463	isogroup00027	2680	ref|XP_002456539.1|	hypothetical protein SORBIDRAFT_03g038070 [Sorghum bicolor] gb|EES01659.1| hypothetical protein SORBIDRAFT_03g038070 [Sorghum bicolor]
isotig00464	isogroup00027	2634	ref|XP_002456539.1|	hypothetical protein SORBIDRAFT_03g038070 [Sorghum bicolor] gb|EES01659.1| hypothetical protein SORBIDRAFT_03g038070 [Sorghum bicolor]
isotig00465	isogroup00027	2639	gb|AAS07235.1|	putative galactosyltransferase, 3'-partial [Oryza sativa Japonica Group]
isotig00466	isogroup00027	2655	gb|AFW67306.1|	hypothetical protein ZEAMMB73_194510, partial [Zea mays]
isotig00467	isogroup00027	2586	ref|XP_002456539.1|	hypothetical protein SORBIDRAFT_03g038070 [Sorghum bicolor] gb|EES01659.1| hypothetical protein SORBIDRAFT_03g038070 [Sorghum bicolor]
isotig00468	isogroup00027	2558	ref|XP_002456539.1|	hypothetical protein SORBIDRAFT_03g038070 [Sorghum bicolor] gb|EES01659.1| hypothetical protein SORBIDRAFT_03g038070 [Sorghum bicolor]
isotig00469	isogroup00027	2561	ref|XP_002456539.1|	hypothetical protein SORBIDRAFT_03g038070 [Sorghum bicolor] gb|EES01659.1| hypothetical protein SORBIDRAFT_03g038070 [Sorghum bicolor]
isotig00470	isogroup00027	2510	ref|XP_002456539.1|	hypothetical protein SORBIDRAFT_03g038070 [Sorghum bicolor] gb|EES01659.1| hypothetical protein SORBIDRAFT_03g038070 [Sorghum bicolor]
isotig00471	isogroup00027	2526	ref|XP_002456539.1|	hypothetical protein SORBIDRAFT_03g038070 [Sorghum bicolor] gb|EES01659.1| hypothetical protein SORBIDRAFT_03g038070 [Sorghum bicolor]
isotig00472	isogroup00027	2485	gb|AAS07235.1|	putative galactosyltransferase, 3'-partial [Oryza sativa Japonica Group]
isotig00473	isogroup00027	2432	ref|XP_002456539.1|	hypothetical protein SORBIDRAFT_03g038070 [Sorghum bicolor] gb|EES01659.1| hypothetical protein SORBIDRAFT_03g038070 [Sorghum bicolor]
isotig00474	isogroup00027	2405	gb|AFW67306.1|	hypothetical protein ZEAMMB73_194510, partial [Zea mays]
isotig00475	isogroup00027	2356	ref|XP_002456539.1|	hypothetical protein SORBIDRAFT_03g038070 [Sorghum bicolor] gb|EES01659.1| hypothetical protein SORBIDRAFT_03g038070 [Sorghum bicolor]
isotig00476	isogroup00027	2311	ref|XP_002456539.1|	hypothetical protein SORBIDRAFT_03g038070 [Sorghum bicolor] gb|EES01659.1| hypothetical protein SORBIDRAFT_03g038070 [Sorghum bicolor]
isotig00477	isogroup00027	2276	ref|XP_002456539.1|	hypothetical protein SORBIDRAFT_03g038070 [Sorghum bicolor] gb|EES01659.1| hypothetical protein SORBIDRAFT_03g038070 [Sorghum bicolor]
isotig00478	isogroup00027	2235	gb|AAS07235.1|	putative galactosyltransferase, 3'-partial [Oryza sativa Japonica Group]
isotig00479	isogroup00027	2182	ref|XP_002456539.1|	hypothetical protein SORBIDRAFT_03g038070 [Sorghum bicolor] gb|EES01659.1| hypothetical protein SORBIDRAFT_03g038070 [Sorghum bicolor]
isotig00480	isogroup00027	2106	ref|XP_002456539.1|	hypothetical protein SORBIDRAFT_03g038070 [Sorghum bicolor] gb|EES01659.1| hypothetical protein SORBIDRAFT_03g038070 [Sorghum bicolor]
isotig00481	isogroup00027	1211
isotig00482	isogroup00027	1122
isotig00483	isogroup00027	1025	gb|AAS07235.1|	putative galactosyltransferase, 3'-partial [Oryza sativa Japonica Group]
isotig00484	isogroup00027	921
isotig00485	isogroup00027	931	ref|XP_002456539.1|	hypothetical protein SORBIDRAFT_03g038070 [Sorghum bicolor] gb|EES01659.1| hypothetical protein SORBIDRAFT_03g038070 [Sorghum bicolor]
isotig00486	isogroup00027	896	ref|XP_002456539.1|	hypothetical protein SORBIDRAFT_03g038070 [Sorghum bicolor] gb|EES01659.1| hypothetical protein SORBIDRAFT_03g038070 [Sorghum bicolor]
isotig00487	isogroup00027	855	gb|AAS07235.1|	putative galactosyltransferase, 3'-partial [Oryza sativa Japonica Group]
isotig00488	isogroup00027	816
isotig00489	isogroup00027	802	ref|XP_002456539.1|	hypothetical protein SORBIDRAFT_03g038070 [Sorghum bicolor] gb|EES01659.1| hypothetical protein SORBIDRAFT_03g038070 [Sorghum bicolor]
isotig00490	isogroup00027	726	ref|XP_002456539.1|	hypothetical protein SORBIDRAFT_03g038070 [Sorghum bicolor] gb|EES01659.1| hypothetical protein SORBIDRAFT_03g038070 [Sorghum bicolor]
isotig00491	isogroup00027	662
isotig00492	isogroup00027	412
isotig00493	isogroup00030	6908	gb|EEE56150.1|	hypothetical protein OsJ_05035 [Oryza sativa Japonica Group]
isotig00494	isogroup00030	6908	gb|EEE56150.1|	hypothetical protein OsJ_05035 [Oryza sativa Japonica Group]
isotig00495	isogroup00030	6908	ref|XP_002463258.1|	hypothetical protein SORBIDRAFT_02g040700 [Sorghum bicolor] gb|EER99779.1| hypothetical protein SORBIDRAFT_02g040700 [Sorghum bicolor]
isotig00496	isogroup00030	6908	ref|XP_002463258.1|	hypothetical protein SORBIDRAFT_02g040700 [Sorghum bicolor] gb|EER99779.1| hypothetical protein SORBIDRAFT_02g040700 [Sorghum bicolor]
isotig00497	isogroup00030	6825	gb|EEE56150.1|	hypothetical protein OsJ_05035 [Oryza sativa Japonica Group]
isotig00498	isogroup00030	6907	gb|EEE56150.1|	hypothetical protein OsJ_05035 [Oryza sativa Japonica Group]
isotig00499	isogroup00030	6885	gb|EEE56150.1|	hypothetical protein OsJ_05035 [Oryza sativa Japonica Group]
isotig00500	isogroup00030	6825	gb|EEE56150.1|	hypothetical protein OsJ_05035 [Oryza sativa Japonica Group]
isotig00501	isogroup00030	6907	gb|EEE56150.1|	hypothetical protein OsJ_05035 [Oryza sativa Japonica Group]
isotig00502	isogroup00030	6885	gb|EEE56150.1|	hypothetical protein OsJ_05035 [Oryza sativa Japonica Group]
isotig00503	isogroup00030	6824	ref|XP_002463258.1|	hypothetical protein SORBIDRAFT_02g040700 [Sorghum bicolor] gb|EER99779.1| hypothetical protein SORBIDRAFT_02g040700 [Sorghum bicolor]
isotig00504	isogroup00030	6908	ref|XP_002463258.1|	hypothetical protein SORBIDRAFT_02g040700 [Sorghum bicolor] gb|EER99779.1| hypothetical protein SORBIDRAFT_02g040700 [Sorghum bicolor]
isotig00505	isogroup00030	6887	ref|XP_002463258.1|	hypothetical protein SORBIDRAFT_02g040700 [Sorghum bicolor] gb|EER99779.1| hypothetical protein SORBIDRAFT_02g040700 [Sorghum bicolor]
isotig00506	isogroup00030	6824	ref|XP_002463258.1|	hypothetical protein SORBIDRAFT_02g040700 [Sorghum bicolor] gb|EER99779.1| hypothetical protein SORBIDRAFT_02g040700 [Sorghum bicolor]
isotig00507	isogroup00030	6908	ref|XP_002463258.1|	hypothetical protein SORBIDRAFT_02g040700 [Sorghum bicolor] gb|EER99779.1| hypothetical protein SORBIDRAFT_02g040700 [Sorghum bicolor]
isotig00508	isogroup00030	6887	ref|XP_002463258.1|	hypothetical protein SORBIDRAFT_02g040700 [Sorghum bicolor] gb|EER99779.1| hypothetical protein SORBIDRAFT_02g040700 [Sorghum bicolor]
isotig00509	isogroup00030	6824	gb|EEE56150.1|	hypothetical protein OsJ_05035 [Oryza sativa Japonica Group]
isotig00510	isogroup00030	6884	gb|EEE56150.1|	hypothetical protein OsJ_05035 [Oryza sativa Japonica Group]
isotig00511	isogroup00030	6824	gb|EEE56150.1|	hypothetical protein OsJ_05035 [Oryza sativa Japonica Group]
isotig00512	isogroup00030	6884	gb|EEE56150.1|	hypothetical protein OsJ_05035 [Oryza sativa Japonica Group]
isotig00513	isogroup00030	6888	ref|XP_002463258.1|	hypothetical protein SORBIDRAFT_02g040700 [Sorghum bicolor] gb|EER99779.1| hypothetical protein SORBIDRAFT_02g040700 [Sorghum bicolor]
isotig00514	isogroup00030	6824	ref|XP_002463258.1|	hypothetical protein SORBIDRAFT_02g040700 [Sorghum bicolor] gb|EER99779.1| hypothetical protein SORBIDRAFT_02g040700 [Sorghum bicolor]
isotig00515	isogroup00030	6888	ref|XP_002463258.1|	hypothetical protein SORBIDRAFT_02g040700 [Sorghum bicolor] gb|EER99779.1| hypothetical protein SORBIDRAFT_02g040700 [Sorghum bicolor]
isotig00516	isogroup00030	6887	ref|XP_002463258.1|	hypothetical protein SORBIDRAFT_02g040700 [Sorghum bicolor] gb|EER99779.1| hypothetical protein SORBIDRAFT_02g040700 [Sorghum bicolor]
isotig00517	isogroup00030	6824	ref|XP_002463258.1|	hypothetical protein SORBIDRAFT_02g040700 [Sorghum bicolor] gb|EER99779.1| hypothetical protein SORBIDRAFT_02g040700 [Sorghum bicolor]
isotig00518	isogroup00030	6887	ref|XP_002463258.1|	hypothetical protein SORBIDRAFT_02g040700 [Sorghum bicolor] gb|EER99779.1| hypothetical protein SORBIDRAFT_02g040700 [Sorghum bicolor]
isotig00519	isogroup00030	6804	ref|XP_002463258.1|	hypothetical protein SORBIDRAFT_02g040700 [Sorghum bicolor] gb|EER99779.1| hypothetical protein SORBIDRAFT_02g040700 [Sorghum bicolor]
isotig00520	isogroup00030	6888	ref|XP_002463258.1|	hypothetical protein SORBIDRAFT_02g040700 [Sorghum bicolor] gb|EER99779.1| hypothetical protein SORBIDRAFT_02g040700 [Sorghum bicolor]
isotig00521	isogroup00030	6867	ref|XP_002463258.1|	hypothetical protein SORBIDRAFT_02g040700 [Sorghum bicolor] gb|EER99779.1| hypothetical protein SORBIDRAFT_02g040700 [Sorghum bicolor]
isotig00522	isogroup00030	6804	ref|XP_002463258.1|	hypothetical protein SORBIDRAFT_02g040700 [Sorghum bicolor] gb|EER99779.1| hypothetical protein SORBIDRAFT_02g040700 [Sorghum bicolor]
isotig00523	isogroup00030	6888	ref|XP_002463258.1|	hypothetical protein SORBIDRAFT_02g040700 [Sorghum bicolor] gb|EER99779.1| hypothetical protein SORBIDRAFT_02g040700 [Sorghum bicolor]
isotig00524	isogroup00030	6867	ref|XP_002463258.1|	hypothetical protein SORBIDRAFT_02g040700 [Sorghum bicolor] gb|EER99779.1| hypothetical protein SORBIDRAFT_02g040700 [Sorghum bicolor]
isotig00525	isogroup00030	6804	ref|XP_002463258.1|	hypothetical protein SORBIDRAFT_02g040700 [Sorghum bicolor] gb|EER99779.1| hypothetical protein SORBIDRAFT_02g040700 [Sorghum bicolor]
isotig00526	isogroup00030	6867	ref|XP_002463258.1|	hypothetical protein SORBIDRAFT_02g040700 [Sorghum bicolor] gb|EER99779.1| hypothetical protein SORBIDRAFT_02g040700 [Sorghum bicolor]
isotig00527	isogroup00030	6804	ref|XP_002463258.1|	hypothetical protein SORBIDRAFT_02g040700 [Sorghum bicolor] gb|EER99779.1| hypothetical protein SORBIDRAFT_02g040700 [Sorghum bicolor]
isotig00528	isogroup00030	6867	ref|XP_002463258.1|	hypothetical protein SORBIDRAFT_02g040700 [Sorghum bicolor] gb|EER99779.1| hypothetical protein SORBIDRAFT_02g040700 [Sorghum bicolor]
isotig00529	isogroup00030	3812	ref|XP_002463258.1|	hypothetical protein SORBIDRAFT_02g040700 [Sorghum bicolor] gb|EER99779.1| hypothetical protein SORBIDRAFT_02g040700 [Sorghum bicolor]
isotig00530	isogroup00030	3812	ref|XP_002463258.1|	hypothetical protein SORBIDRAFT_02g040700 [Sorghum bicolor] gb|EER99779.1| hypothetical protein SORBIDRAFT_02g040700 [Sorghum bicolor]
isotig00531	isogroup00030	3728	ref|XP_002463258.1|	hypothetical protein SORBIDRAFT_02g040700 [Sorghum bicolor] gb|EER99779.1| hypothetical protein SORBIDRAFT_02g040700 [Sorghum bicolor]
isotig00532	isogroup00030	3812	ref|XP_002463258.1|	hypothetical protein SORBIDRAFT_02g040700 [Sorghum bicolor] gb|EER99779.1| hypothetical protein SORBIDRAFT_02g040700 [Sorghum bicolor]
isotig00533	isogroup00030	3791	ref|XP_002463258.1|	hypothetical protein SORBIDRAFT_02g040700 [Sorghum bicolor] gb|EER99779.1| hypothetical protein SORBIDRAFT_02g040700 [Sorghum bicolor]
isotig00534	isogroup00030	3728	ref|XP_002463258.1|	hypothetical protein SORBIDRAFT_02g040700 [Sorghum bicolor] gb|EER99779.1| hypothetical protein SORBIDRAFT_02g040700 [Sorghum bicolor]
isotig00535	isogroup00030	3812	ref|XP_002463258.1|	hypothetical protein SORBIDRAFT_02g040700 [Sorghum bicolor] gb|EER99779.1| hypothetical protein SORBIDRAFT_02g040700 [Sorghum bicolor]
isotig00536	isogroup00030	3791	ref|XP_002463258.1|	hypothetical protein SORBIDRAFT_02g040700 [Sorghum bicolor] gb|EER99779.1| hypothetical protein SORBIDRAFT_02g040700 [Sorghum bicolor]
isotig00537	isogroup00030	3728	ref|XP_002463258.1|	hypothetical protein SORBIDRAFT_02g040700 [Sorghum bicolor] gb|EER99779.1| hypothetical protein SORBIDRAFT_02g040700 [Sorghum bicolor]
isotig00538	isogroup00030	3791	ref|XP_002463258.1|	hypothetical protein SORBIDRAFT_02g040700 [Sorghum bicolor] gb|EER99779.1| hypothetical protein SORBIDRAFT_02g040700 [Sorghum bicolor]
isotig00539	isogroup00030	3728	ref|XP_002463258.1|	hypothetical protein SORBIDRAFT_02g040700 [Sorghum bicolor] gb|EER99779.1| hypothetical protein SORBIDRAFT_02g040700 [Sorghum bicolor]
isotig00540	isogroup00030	3791	ref|XP_002463258.1|	hypothetical protein SORBIDRAFT_02g040700 [Sorghum bicolor] gb|EER99779.1| hypothetical protein SORBIDRAFT_02g040700 [Sorghum bicolor]
isotig00541	isogroup00030	3838	ref|XP_002463258.1|	hypothetical protein SORBIDRAFT_02g040700 [Sorghum bicolor] gb|EER99779.1| hypothetical protein SORBIDRAFT_02g040700 [Sorghum bicolor]
isotig00542	isogroup00030	3081	tpg|DAA63842.1|	TPA: hypothetical protein ZEAMMB73_298710 [Zea mays]
isotig00543	isogroup00030	3081	tpg|DAA63842.1|	TPA: hypothetical protein ZEAMMB73_298710 [Zea mays]
isotig00544	isogroup00030	2997	tpg|DAA63842.1|	TPA: hypothetical protein ZEAMMB73_298710 [Zea mays]
isotig00545	isogroup00030	3081	tpg|DAA63842.1|	TPA: hypothetical protein ZEAMMB73_298710 [Zea mays]
isotig00546	isogroup00030	3060	tpg|DAA63842.1|	TPA: hypothetical protein ZEAMMB73_298710 [Zea mays]
isotig00547	isogroup00030	2997	tpg|DAA63842.1|	TPA: hypothetical protein ZEAMMB73_298710 [Zea mays]
isotig00548	isogroup00030	3081	tpg|DAA63842.1|	TPA: hypothetical protein ZEAMMB73_298710 [Zea mays]
isotig00549	isogroup00030	3060	tpg|DAA63842.1|	TPA: hypothetical protein ZEAMMB73_298710 [Zea mays]
isotig00550	isogroup00030	2997	tpg|DAA63842.1|	TPA: hypothetical protein ZEAMMB73_298710 [Zea mays]
isotig00551	isogroup00030	3060	tpg|DAA63842.1|	TPA: hypothetical protein ZEAMMB73_298710 [Zea mays]
isotig00552	isogroup00030	2997	tpg|DAA63842.1|	TPA: hypothetical protein ZEAMMB73_298710 [Zea mays]
isotig00553	isogroup00030	3060	tpg|DAA63842.1|	TPA: hypothetical protein ZEAMMB73_298710 [Zea mays]
isotig00554	isogroup00030	2537	tpg|DAA63842.1|	TPA: hypothetical protein ZEAMMB73_298710 [Zea mays]
isotig00555	isogroup00030	2537	tpg|DAA63842.1|	TPA: hypothetical protein ZEAMMB73_298710 [Zea mays]
isotig00556	isogroup00030	2453	tpg|DAA63842.1|	TPA: hypothetical protein ZEAMMB73_298710 [Zea mays]
isotig00557	isogroup00030	2537	tpg|DAA63842.1|	TPA: hypothetical protein ZEAMMB73_298710 [Zea mays]
isotig00558	isogroup00030	2516	tpg|DAA63842.1|	TPA: hypothetical protein ZEAMMB73_298710 [Zea mays]
isotig00559	isogroup00030	2453	tpg|DAA63842.1|	TPA: hypothetical protein ZEAMMB73_298710 [Zea mays]
isotig00560	isogroup00030	2537	tpg|DAA63842.1|	TPA: hypothetical protein ZEAMMB73_298710 [Zea mays]
isotig00561	isogroup00030	2516	tpg|DAA63842.1|	TPA: hypothetical protein ZEAMMB73_298710 [Zea mays]
isotig00562	isogroup00030	2453	tpg|DAA63842.1|	TPA: hypothetical protein ZEAMMB73_298710 [Zea mays]
isotig00563	isogroup00030	2516	tpg|DAA63842.1|	TPA: hypothetical protein ZEAMMB73_298710 [Zea mays]
isotig00564	isogroup00030	2453	tpg|DAA63842.1|	TPA: hypothetical protein ZEAMMB73_298710 [Zea mays]
isotig00565	isogroup00030	2516	tpg|DAA63842.1|	TPA: hypothetical protein ZEAMMB73_298710 [Zea mays]
isotig00566	isogroup00030	1320	ref|NP_001045632.1|	Os02g0107000 [Oryza sativa Japonica Group] dbj|BAF07546.1| Os02g0107000, partial [Oryza sativa Japonica Group]
isotig00567	isogroup00030	1236	ref|NP_001045632.1|	Os02g0107000 [Oryza sativa Japonica Group] dbj|BAF07546.1| Os02g0107000, partial [Oryza sativa Japonica Group]
isotig00568	isogroup00030	1299	ref|NP_001045632.1|	Os02g0107000 [Oryza sativa Japonica Group] dbj|BAF07546.1| Os02g0107000, partial [Oryza sativa Japonica Group]
isotig00569	isogroup00030	766	ref|XP_002463258.1|	hypothetical protein SORBIDRAFT_02g040700 [Sorghum bicolor] gb|EER99779.1| hypothetical protein SORBIDRAFT_02g040700 [Sorghum bicolor]
isotig00570	isogroup00031	830	gb|ACG38676.1|	membrane protein LEM1 [Zea mays]
isotig00571	isogroup00031	830	gb|ACG38676.1|	membrane protein LEM1 [Zea mays]
isotig00572	isogroup00031	830	gb|ACG38676.1|	membrane protein LEM1 [Zea mays]
isotig00573	isogroup00031	830	gb|ACG38676.1|	membrane protein LEM1 [Zea mays]
isotig00574	isogroup00031	831	gb|ACG38676.1|	membrane protein LEM1 [Zea mays]
isotig00575	isogroup00031	831	gb|ACG38676.1|	membrane protein LEM1 [Zea mays]
isotig00576	isogroup00031	810	gb|ACG38676.1|	membrane protein LEM1 [Zea mays]
isotig00577	isogroup00031	791	gb|ACG38676.1|	membrane protein LEM1 [Zea mays]
isotig00578	isogroup00031	810	gb|ACG38676.1|	membrane protein LEM1 [Zea mays]
isotig00579	isogroup00031	791	gb|ACG38676.1|	membrane protein LEM1 [Zea mays]
isotig00580	isogroup00031	681	gb|ACG38676.1|	membrane protein LEM1 [Zea mays]
isotig00581	isogroup00031	681	gb|ACG38676.1|	membrane protein LEM1 [Zea mays]
isotig00582	isogroup00031	680	ref|XP_002459029.1|	hypothetical protein SORBIDRAFT_03g044760 [Sorghum bicolor] gb|EES04149.1| hypothetical protein SORBIDRAFT_03g044760 [Sorghum bicolor]
isotig00583	isogroup00031	680	ref|XP_002459029.1|	hypothetical protein SORBIDRAFT_03g044760 [Sorghum bicolor] gb|EES04149.1| hypothetical protein SORBIDRAFT_03g044760 [Sorghum bicolor]
isotig00584	isogroup00031	682	gb|ACG38676.1|	membrane protein LEM1 [Zea mays]
isotig00585	isogroup00031	682	gb|ACG38676.1|	membrane protein LEM1 [Zea mays]
isotig00586	isogroup00031	682	ref|XP_002459029.1|	hypothetical protein SORBIDRAFT_03g044760 [Sorghum bicolor] gb|EES04149.1| hypothetical protein SORBIDRAFT_03g044760 [Sorghum bicolor]
isotig00587	isogroup00031	682	ref|XP_002459029.1|	hypothetical protein SORBIDRAFT_03g044760 [Sorghum bicolor] gb|EES04149.1| hypothetical protein SORBIDRAFT_03g044760 [Sorghum bicolor]
isotig00588	isogroup00031	682	gb|ACG38676.1|	membrane protein LEM1 [Zea mays]
isotig00589	isogroup00031	681	ref|XP_002459029.1|	hypothetical protein SORBIDRAFT_03g044760 [Sorghum bicolor] gb|EES04149.1| hypothetical protein SORBIDRAFT_03g044760 [Sorghum bicolor]
isotig00590	isogroup00031	668	ref|XP_002459029.1|	hypothetical protein SORBIDRAFT_03g044760 [Sorghum bicolor] gb|EES04149.1| hypothetical protein SORBIDRAFT_03g044760 [Sorghum bicolor]
isotig00591	isogroup00031	668	ref|XP_002459029.1|	hypothetical protein SORBIDRAFT_03g044760 [Sorghum bicolor] gb|EES04149.1| hypothetical protein SORBIDRAFT_03g044760 [Sorghum bicolor]
isotig00592	isogroup00031	683	gb|ACG38676.1|	membrane protein LEM1 [Zea mays]
isotig00593	isogroup00031	683	ref|XP_002459029.1|	hypothetical protein SORBIDRAFT_03g044760 [Sorghum bicolor] gb|EES04149.1| hypothetical protein SORBIDRAFT_03g044760 [Sorghum bicolor]
isotig00594	isogroup00031	795	gb|ACG38676.1|	membrane protein LEM1 [Zea mays]
isotig00595	isogroup00031	661	gb|ACG38676.1|	membrane protein LEM1 [Zea mays]
isotig00596	isogroup00031	669	ref|XP_002459029.1|	hypothetical protein SORBIDRAFT_03g044760 [Sorghum bicolor] gb|EES04149.1| hypothetical protein SORBIDRAFT_03g044760 [Sorghum bicolor]
isotig00597	isogroup00031	660	ref|XP_002459029.1|	hypothetical protein SORBIDRAFT_03g044760 [Sorghum bicolor] gb|EES04149.1| hypothetical protein SORBIDRAFT_03g044760 [Sorghum bicolor]
isotig00598	isogroup00031	642	gb|ACG38676.1|	membrane protein LEM1 [Zea mays]
isotig00599	isogroup00031	641	ref|XP_002459029.1|	hypothetical protein SORBIDRAFT_03g044760 [Sorghum bicolor] gb|EES04149.1| hypothetical protein SORBIDRAFT_03g044760 [Sorghum bicolor]
isotig00600	isogroup00031	662	gb|ACG38676.1|	membrane protein LEM1 [Zea mays]
isotig00601	isogroup00031	662	ref|XP_002459029.1|	hypothetical protein SORBIDRAFT_03g044760 [Sorghum bicolor] gb|EES04149.1| hypothetical protein SORBIDRAFT_03g044760 [Sorghum bicolor]
isotig00602	isogroup00031	643	gb|ACG38676.1|	membrane protein LEM1 [Zea mays]
isotig00603	isogroup00031	643	ref|XP_002459029.1|	hypothetical protein SORBIDRAFT_03g044760 [Sorghum bicolor] gb|EES04149.1| hypothetical protein SORBIDRAFT_03g044760 [Sorghum bicolor]
isotig00604	isogroup00031	648	ref|XP_002459029.1|	hypothetical protein SORBIDRAFT_03g044760 [Sorghum bicolor] gb|EES04149.1| hypothetical protein SORBIDRAFT_03g044760 [Sorghum bicolor]
isotig00605	isogroup00031	559	ref|XP_002459029.1|	hypothetical protein SORBIDRAFT_03g044760 [Sorghum bicolor] gb|EES04149.1| hypothetical protein SORBIDRAFT_03g044760 [Sorghum bicolor]
isotig00606	isogroup00031	559	ref|XP_002459029.1|	hypothetical protein SORBIDRAFT_03g044760 [Sorghum bicolor] gb|EES04149.1| hypothetical protein SORBIDRAFT_03g044760 [Sorghum bicolor]
isotig00607	isogroup00031	629	ref|XP_002459029.1|	hypothetical protein SORBIDRAFT_03g044760 [Sorghum bicolor] gb|EES04149.1| hypothetical protein SORBIDRAFT_03g044760 [Sorghum bicolor]
isotig00608	isogroup00031	560	ref|XP_002459029.1|	hypothetical protein SORBIDRAFT_03g044760 [Sorghum bicolor] gb|EES04149.1| hypothetical protein SORBIDRAFT_03g044760 [Sorghum bicolor]
isotig00609	isogroup00031	679	gb|ACG38676.1|	membrane protein LEM1 [Zea mays]
isotig00610	isogroup00031	539	ref|XP_002459029.1|	hypothetical protein SORBIDRAFT_03g044760 [Sorghum bicolor] gb|EES04149.1| hypothetical protein SORBIDRAFT_03g044760 [Sorghum bicolor]
isotig00611	isogroup00031	520	ref|XP_002459029.1|	hypothetical protein SORBIDRAFT_03g044760 [Sorghum bicolor] gb|EES04149.1| hypothetical protein SORBIDRAFT_03g044760 [Sorghum bicolor]
isotig00612	isogroup00031	475
isotig00613	isogroup00031	475
isotig00614	isogroup00031	476
isotig00615	isogroup00031	455
isotig00616	isogroup00031	436
isotig00617	isogroup00031	149
isotig00618	isogroup00032	3187	gb|AFW64135.1|	hypothetical protein ZEAMMB73_176120 [Zea mays]
isotig00619	isogroup00032	3182	gb|AFW64135.1|	hypothetical protein ZEAMMB73_176120 [Zea mays]
isotig00620	isogroup00032	3188	ref|XP_002452983.1|	hypothetical protein SORBIDRAFT_04g036040 [Sorghum bicolor] gb|EES05959.1| hypothetical protein SORBIDRAFT_04g036040 [Sorghum bicolor]
isotig00621	isogroup00032	3183	ref|XP_002452983.1|	hypothetical protein SORBIDRAFT_04g036040 [Sorghum bicolor] gb|EES05959.1| hypothetical protein SORBIDRAFT_04g036040 [Sorghum bicolor]
isotig00622	isogroup00032	3186	ref|XP_002452983.1|	hypothetical protein SORBIDRAFT_04g036040 [Sorghum bicolor] gb|EES05959.1| hypothetical protein SORBIDRAFT_04g036040 [Sorghum bicolor]
isotig00623	isogroup00032	3181	ref|XP_002452983.1|	hypothetical protein SORBIDRAFT_04g036040 [Sorghum bicolor] gb|EES05959.1| hypothetical protein SORBIDRAFT_04g036040 [Sorghum bicolor]
isotig00624	isogroup00032	3187	ref|XP_002452983.1|	hypothetical protein SORBIDRAFT_04g036040 [Sorghum bicolor] gb|EES05959.1| hypothetical protein SORBIDRAFT_04g036040 [Sorghum bicolor]
isotig00625	isogroup00032	3182	ref|XP_002452983.1|	hypothetical protein SORBIDRAFT_04g036040 [Sorghum bicolor] gb|EES05959.1| hypothetical protein SORBIDRAFT_04g036040 [Sorghum bicolor]
isotig00626	isogroup00032	3187	ref|XP_002452983.1|	hypothetical protein SORBIDRAFT_04g036040 [Sorghum bicolor] gb|EES05959.1| hypothetical protein SORBIDRAFT_04g036040 [Sorghum bicolor]
isotig00627	isogroup00032	3187	gb|AFW64135.1|	hypothetical protein ZEAMMB73_176120 [Zea mays]
isotig00628	isogroup00032	3182	ref|XP_002452983.1|	hypothetical protein SORBIDRAFT_04g036040 [Sorghum bicolor] gb|EES05959.1| hypothetical protein SORBIDRAFT_04g036040 [Sorghum bicolor]
isotig00629	isogroup00032	3182	gb|AFW64135.1|	hypothetical protein ZEAMMB73_176120 [Zea mays]
isotig00630	isogroup00032	3325	gb|AFW64135.1|	hypothetical protein ZEAMMB73_176120 [Zea mays]
isotig00631	isogroup00032	3320	gb|AFW64135.1|	hypothetical protein ZEAMMB73_176120 [Zea mays]
isotig00632	isogroup00032	3188	ref|XP_002452983.1|	hypothetical protein SORBIDRAFT_04g036040 [Sorghum bicolor] gb|EES05959.1| hypothetical protein SORBIDRAFT_04g036040 [Sorghum bicolor]
isotig00633	isogroup00032	3186	ref|XP_002452983.1|	hypothetical protein SORBIDRAFT_04g036040 [Sorghum bicolor] gb|EES05959.1| hypothetical protein SORBIDRAFT_04g036040 [Sorghum bicolor]
isotig00634	isogroup00032	3183	ref|XP_002452983.1|	hypothetical protein SORBIDRAFT_04g036040 [Sorghum bicolor] gb|EES05959.1| hypothetical protein SORBIDRAFT_04g036040 [Sorghum bicolor]
isotig00635	isogroup00032	3326	gb|AFW85572.1|	hypothetical protein ZEAMMB73_339820 [Zea mays]
isotig00636	isogroup00032	3181	ref|XP_002452983.1|	hypothetical protein SORBIDRAFT_04g036040 [Sorghum bicolor] gb|EES05959.1| hypothetical protein SORBIDRAFT_04g036040 [Sorghum bicolor]
isotig00637	isogroup00032	3321	gb|AFW85572.1|	hypothetical protein ZEAMMB73_339820 [Zea mays]
isotig00638	isogroup00032	3184	gb|AFW64135.1|	hypothetical protein ZEAMMB73_176120 [Zea mays]
isotig00639	isogroup00032	3184	gb|AFW64135.1|	hypothetical protein ZEAMMB73_176120 [Zea mays]
isotig00640	isogroup00032	3179	gb|AFW64135.1|	hypothetical protein ZEAMMB73_176120 [Zea mays]
isotig00641	isogroup00032	3179	gb|AFW64135.1|	hypothetical protein ZEAMMB73_176120 [Zea mays]
isotig00642	isogroup00032	3185	ref|XP_002452983.1|	hypothetical protein SORBIDRAFT_04g036040 [Sorghum bicolor] gb|EES05959.1| hypothetical protein SORBIDRAFT_04g036040 [Sorghum bicolor]
isotig00643	isogroup00032	3185	ref|XP_002452983.1|	hypothetical protein SORBIDRAFT_04g036040 [Sorghum bicolor] gb|EES05959.1| hypothetical protein SORBIDRAFT_04g036040 [Sorghum bicolor]
isotig00644	isogroup00032	3187	ref|XP_002452983.1|	hypothetical protein SORBIDRAFT_04g036040 [Sorghum bicolor] gb|EES05959.1| hypothetical protein SORBIDRAFT_04g036040 [Sorghum bicolor]
isotig00645	isogroup00032	3180	ref|XP_002452983.1|	hypothetical protein SORBIDRAFT_04g036040 [Sorghum bicolor] gb|EES05959.1| hypothetical protein SORBIDRAFT_04g036040 [Sorghum bicolor]
isotig00646	isogroup00032	3180	ref|XP_002452983.1|	hypothetical protein SORBIDRAFT_04g036040 [Sorghum bicolor] gb|EES05959.1| hypothetical protein SORBIDRAFT_04g036040 [Sorghum bicolor]
isotig00647	isogroup00032	3182	ref|XP_002452983.1|	hypothetical protein SORBIDRAFT_04g036040 [Sorghum bicolor] gb|EES05959.1| hypothetical protein SORBIDRAFT_04g036040 [Sorghum bicolor]
isotig00648	isogroup00032	3325	gb|AFW64135.1|	hypothetical protein ZEAMMB73_176120 [Zea mays]
isotig00649	isogroup00032	3320	gb|AFW64135.1|	hypothetical protein ZEAMMB73_176120 [Zea mays]
isotig00650	isogroup00032	3184	ref|XP_002452983.1|	hypothetical protein SORBIDRAFT_04g036040 [Sorghum bicolor] gb|EES05959.1| hypothetical protein SORBIDRAFT_04g036040 [Sorghum bicolor]
isotig00651	isogroup00032	3184	ref|XP_002452983.1|	hypothetical protein SORBIDRAFT_04g036040 [Sorghum bicolor] gb|EES05959.1| hypothetical protein SORBIDRAFT_04g036040 [Sorghum bicolor]
isotig00652	isogroup00032	3179	ref|XP_002452983.1|	hypothetical protein SORBIDRAFT_04g036040 [Sorghum bicolor] gb|EES05959.1| hypothetical protein SORBIDRAFT_04g036040 [Sorghum bicolor]
isotig00653	isogroup00032	3207	gb|AFW85572.1|	hypothetical protein ZEAMMB73_339820 [Zea mays]
isotig00654	isogroup00032	3179	ref|XP_002452983.1|	hypothetical protein SORBIDRAFT_04g036040 [Sorghum bicolor] gb|EES05959.1| hypothetical protein SORBIDRAFT_04g036040 [Sorghum bicolor]
isotig00655	isogroup00032	3066	gb|AFW64135.1|	hypothetical protein ZEAMMB73_176120 [Zea mays]
isotig00656	isogroup00032	3066	gb|AFW64135.1|	hypothetical protein ZEAMMB73_176120 [Zea mays]
isotig00657	isogroup00032	1005	ref|NP_001182902.1|	uncharacterized protein LOC100501185 [Zea mays] gb|ACR35080.1| unknown [Zea mays]
isotig00658	isogroup00033	2092	ref|NP_001132751.1|	uncharacterized protein LOC100194238 precursor [Zea mays] gb|ACF81734.1| unknown [Zea mays] gb|AFW85142.1| hypothetical protein ZEAMMB73_336900 [Zea mays]
isotig00659	isogroup00033	2092	ref|NP_001132751.1|	uncharacterized protein LOC100194238 precursor [Zea mays] gb|ACF81734.1| unknown [Zea mays] gb|AFW85142.1| hypothetical protein ZEAMMB73_336900 [Zea mays]
isotig00660	isogroup00033	2082	ref|NP_001132751.1|	uncharacterized protein LOC100194238 precursor [Zea mays] gb|ACF81734.1| unknown [Zea mays] gb|AFW85142.1| hypothetical protein ZEAMMB73_336900 [Zea mays]
isotig00661	isogroup00033	1930	ref|XP_002456304.1|	hypothetical protein SORBIDRAFT_03g033760 [Sorghum bicolor] gb|EES01424.1| hypothetical protein SORBIDRAFT_03g033760 [Sorghum bicolor]
isotig00662	isogroup00033	1930	ref|XP_002456304.1|	hypothetical protein SORBIDRAFT_03g033760 [Sorghum bicolor] gb|EES01424.1| hypothetical protein SORBIDRAFT_03g033760 [Sorghum bicolor]
isotig00663	isogroup00033	2091	ref|NP_001132751.1|	uncharacterized protein LOC100194238 precursor [Zea mays] gb|ACF81734.1| unknown [Zea mays] gb|AFW85142.1| hypothetical protein ZEAMMB73_336900 [Zea mays]
isotig00664	isogroup00033	2077	ref|NP_001132751.1|	uncharacterized protein LOC100194238 precursor [Zea mays] gb|ACF81734.1| unknown [Zea mays] gb|AFW85142.1| hypothetical protein ZEAMMB73_336900 [Zea mays]
isotig00665	isogroup00033	2077	ref|NP_001132751.1|	uncharacterized protein LOC100194238 precursor [Zea mays] gb|ACF81734.1| unknown [Zea mays] gb|AFW85142.1| hypothetical protein ZEAMMB73_336900 [Zea mays]
isotig00666	isogroup00033	1920	ref|XP_002456304.1|	hypothetical protein SORBIDRAFT_03g033760 [Sorghum bicolor] gb|EES01424.1| hypothetical protein SORBIDRAFT_03g033760 [Sorghum bicolor]
isotig00667	isogroup00033	2067	ref|NP_001132751.1|	uncharacterized protein LOC100194238 precursor [Zea mays] gb|ACF81734.1| unknown [Zea mays] gb|AFW85142.1| hypothetical protein ZEAMMB73_336900 [Zea mays]
isotig00668	isogroup00033	2074	ref|NP_001132751.1|	uncharacterized protein LOC100194238 precursor [Zea mays] gb|ACF81734.1| unknown [Zea mays] gb|AFW85142.1| hypothetical protein ZEAMMB73_336900 [Zea mays]
isotig00669	isogroup00033	1929	ref|XP_002456304.1|	hypothetical protein SORBIDRAFT_03g033760 [Sorghum bicolor] gb|EES01424.1| hypothetical protein SORBIDRAFT_03g033760 [Sorghum bicolor]
isotig00670	isogroup00033	2076	ref|NP_001132751.1|	uncharacterized protein LOC100194238 precursor [Zea mays] gb|ACF81734.1| unknown [Zea mays] gb|AFW85142.1| hypothetical protein ZEAMMB73_336900 [Zea mays]
isotig00671	isogroup00033	1912	ref|XP_002456304.1|	hypothetical protein SORBIDRAFT_03g033760 [Sorghum bicolor] gb|EES01424.1| hypothetical protein SORBIDRAFT_03g033760 [Sorghum bicolor]
isotig00672	isogroup00033	2059	ref|NP_001132751.1|	uncharacterized protein LOC100194238 precursor [Zea mays] gb|ACF81734.1| unknown [Zea mays] gb|AFW85142.1| hypothetical protein ZEAMMB73_336900 [Zea mays]
isotig00673	isogroup00033	2029	ref|NP_001132751.1|	uncharacterized protein LOC100194238 precursor [Zea mays] gb|ACF81734.1| unknown [Zea mays] gb|AFW85142.1| hypothetical protein ZEAMMB73_336900 [Zea mays]
isotig00674	isogroup00033	2029	ref|NP_001132751.1|	uncharacterized protein LOC100194238 precursor [Zea mays] gb|ACF81734.1| unknown [Zea mays] gb|AFW85142.1| hypothetical protein ZEAMMB73_336900 [Zea mays]
isotig00675	isogroup00033	2019	ref|NP_001132751.1|	uncharacterized protein LOC100194238 precursor [Zea mays] gb|ACF81734.1| unknown [Zea mays] gb|AFW85142.1| hypothetical protein ZEAMMB73_336900 [Zea mays]
isotig00676	isogroup00033	1891	ref|NP_001132751.1|	uncharacterized protein LOC100194238 precursor [Zea mays] gb|ACF81734.1| unknown [Zea mays] gb|AFW85142.1| hypothetical protein ZEAMMB73_336900 [Zea mays]
isotig00677	isogroup00033	1891	ref|NP_001132751.1|	uncharacterized protein LOC100194238 precursor [Zea mays] gb|ACF81734.1| unknown [Zea mays] gb|AFW85142.1| hypothetical protein ZEAMMB73_336900 [Zea mays]
isotig00678	isogroup00033	1881	ref|NP_001132751.1|	uncharacterized protein LOC100194238 precursor [Zea mays] gb|ACF81734.1| unknown [Zea mays] gb|AFW85142.1| hypothetical protein ZEAMMB73_336900 [Zea mays]
isotig00679	isogroup00033	2028	ref|NP_001132751.1|	uncharacterized protein LOC100194238 precursor [Zea mays] gb|ACF81734.1| unknown [Zea mays] gb|AFW85142.1| hypothetical protein ZEAMMB73_336900 [Zea mays]
isotig00680	isogroup00033	2014	ref|NP_001132751.1|	uncharacterized protein LOC100194238 precursor [Zea mays] gb|ACF81734.1| unknown [Zea mays] gb|AFW85142.1| hypothetical protein ZEAMMB73_336900 [Zea mays]
isotig00681	isogroup00033	2014	ref|NP_001132751.1|	uncharacterized protein LOC100194238 precursor [Zea mays] gb|ACF81734.1| unknown [Zea mays] gb|AFW85142.1| hypothetical protein ZEAMMB73_336900 [Zea mays]
isotig00682	isogroup00033	2004	ref|NP_001132751.1|	uncharacterized protein LOC100194238 precursor [Zea mays] gb|ACF81734.1| unknown [Zea mays] gb|AFW85142.1| hypothetical protein ZEAMMB73_336900 [Zea mays]
isotig00683	isogroup00033	2011	ref|NP_001132751.1|	uncharacterized protein LOC100194238 precursor [Zea mays] gb|ACF81734.1| unknown [Zea mays] gb|AFW85142.1| hypothetical protein ZEAMMB73_336900 [Zea mays]
isotig00684	isogroup00033	1890	ref|NP_001132751.1|	uncharacterized protein LOC100194238 precursor [Zea mays] gb|ACF81734.1| unknown [Zea mays] gb|AFW85142.1| hypothetical protein ZEAMMB73_336900 [Zea mays]
isotig00685	isogroup00033	2013	ref|NP_001132751.1|	uncharacterized protein LOC100194238 precursor [Zea mays] gb|ACF81734.1| unknown [Zea mays] gb|AFW85142.1| hypothetical protein ZEAMMB73_336900 [Zea mays]
isotig00686	isogroup00033	1894	ref|XP_002456304.1|	hypothetical protein SORBIDRAFT_03g033760 [Sorghum bicolor] gb|EES01424.1| hypothetical protein SORBIDRAFT_03g033760 [Sorghum bicolor]
isotig00687	isogroup00033	1894	ref|XP_002456304.1|	hypothetical protein SORBIDRAFT_03g033760 [Sorghum bicolor] gb|EES01424.1| hypothetical protein SORBIDRAFT_03g033760 [Sorghum bicolor]
isotig00688	isogroup00033	1873	ref|NP_001132751.1|	uncharacterized protein LOC100194238 precursor [Zea mays] gb|ACF81734.1| unknown [Zea mays] gb|AFW85142.1| hypothetical protein ZEAMMB73_336900 [Zea mays]
isotig00689	isogroup00033	1884	ref|XP_002456304.1|	hypothetical protein SORBIDRAFT_03g033760 [Sorghum bicolor] gb|EES01424.1| hypothetical protein SORBIDRAFT_03g033760 [Sorghum bicolor]
isotig00690	isogroup00033	1996	ref|NP_001132751.1|	uncharacterized protein LOC100194238 precursor [Zea mays] gb|ACF81734.1| unknown [Zea mays] gb|AFW85142.1| hypothetical protein ZEAMMB73_336900 [Zea mays]
isotig00691	isogroup00033	1893	ref|XP_002456304.1|	hypothetical protein SORBIDRAFT_03g033760 [Sorghum bicolor] gb|EES01424.1| hypothetical protein SORBIDRAFT_03g033760 [Sorghum bicolor]
isotig00692	isogroup00033	1876	ref|XP_002456304.1|	hypothetical protein SORBIDRAFT_03g033760 [Sorghum bicolor] gb|EES01424.1| hypothetical protein SORBIDRAFT_03g033760 [Sorghum bicolor]
isotig00693	isogroup00033	1876	ref|XP_002456304.1|	hypothetical protein SORBIDRAFT_03g033760 [Sorghum bicolor] gb|EES01424.1| hypothetical protein SORBIDRAFT_03g033760 [Sorghum bicolor]
isotig00694	isogroup00034	2896	ref|XP_003580678.1|	PREDICTED: extended synaptotagmin-1-like [Brachypodium distachyon]
isotig00695	isogroup00034	2868	ref|XP_003580678.1|	PREDICTED: extended synaptotagmin-1-like [Brachypodium distachyon]
isotig00696	isogroup00034	2826	ref|XP_003580678.1|	PREDICTED: extended synaptotagmin-1-like [Brachypodium distachyon]
isotig00697	isogroup00034	2798	ref|XP_003580678.1|	PREDICTED: extended synaptotagmin-1-like [Brachypodium distachyon]
isotig00698	isogroup00034	2517
isotig00699	isogroup00034	2447
isotig00700	isogroup00034	2103
isotig00701	isogroup00034	2095
isotig00702	isogroup00034	2033
isotig00703	isogroup00034	2025
isotig00704	isogroup00034	1945	ref|XP_003580678.1|	PREDICTED: extended synaptotagmin-1-like [Brachypodium distachyon]
isotig00705	isogroup00034	1917	ref|XP_003580678.1|	PREDICTED: extended synaptotagmin-1-like [Brachypodium distachyon]
isotig00706	isogroup00034	1642
isotig00707	isogroup00034	1592
isotig00708	isogroup00034	1586
isotig00709	isogroup00034	1516
isotig00710	isogroup00034	1497	ref|XP_003580678.1|	PREDICTED: extended synaptotagmin-1-like [Brachypodium distachyon]
isotig00711	isogroup00034	1228
isotig00712	isogroup00034	1220
isotig00713	isogroup00034	1178
isotig00714	isogroup00034	1170
isotig00715	isogroup00034	789	tpg|DAA35319.1|	TPA: hypothetical protein ZEAMMB73_060850 [Zea mays]
isotig00716	isogroup00034	719	tpg|DAA35319.1|	TPA: hypothetical protein ZEAMMB73_060850 [Zea mays]
isotig00717	isogroup00034	265
isotig00718	isogroup00035	4486	ref|XP_002445174.1|	hypothetical protein SORBIDRAFT_07g005390 [Sorghum bicolor] gb|EES14669.1| hypothetical protein SORBIDRAFT_07g005390 [Sorghum bicolor]
isotig00719	isogroup00035	4486	ref|XP_002445174.1|	hypothetical protein SORBIDRAFT_07g005390 [Sorghum bicolor] gb|EES14669.1| hypothetical protein SORBIDRAFT_07g005390 [Sorghum bicolor]
isotig00720	isogroup00035	4489	ref|XP_002445174.1|	hypothetical protein SORBIDRAFT_07g005390 [Sorghum bicolor] gb|EES14669.1| hypothetical protein SORBIDRAFT_07g005390 [Sorghum bicolor]
isotig00721	isogroup00035	4486	ref|XP_002445174.1|	hypothetical protein SORBIDRAFT_07g005390 [Sorghum bicolor] gb|EES14669.1| hypothetical protein SORBIDRAFT_07g005390 [Sorghum bicolor]
isotig00722	isogroup00035	4486	ref|XP_002445174.1|	hypothetical protein SORBIDRAFT_07g005390 [Sorghum bicolor] gb|EES14669.1| hypothetical protein SORBIDRAFT_07g005390 [Sorghum bicolor]
isotig00723	isogroup00035	4486	ref|XP_002445174.1|	hypothetical protein SORBIDRAFT_07g005390 [Sorghum bicolor] gb|EES14669.1| hypothetical protein SORBIDRAFT_07g005390 [Sorghum bicolor]
isotig00724	isogroup00035	4486	ref|XP_002445174.1|	hypothetical protein SORBIDRAFT_07g005390 [Sorghum bicolor] gb|EES14669.1| hypothetical protein SORBIDRAFT_07g005390 [Sorghum bicolor]
isotig00725	isogroup00035	4489	ref|XP_002445174.1|	hypothetical protein SORBIDRAFT_07g005390 [Sorghum bicolor] gb|EES14669.1| hypothetical protein SORBIDRAFT_07g005390 [Sorghum bicolor]
isotig00726	isogroup00035	4489	ref|XP_002445174.1|	hypothetical protein SORBIDRAFT_07g005390 [Sorghum bicolor] gb|EES14669.1| hypothetical protein SORBIDRAFT_07g005390 [Sorghum bicolor]
isotig00727	isogroup00035	4486	ref|XP_002445174.1|	hypothetical protein SORBIDRAFT_07g005390 [Sorghum bicolor] gb|EES14669.1| hypothetical protein SORBIDRAFT_07g005390 [Sorghum bicolor]
isotig00728	isogroup00035	4486	ref|XP_002445174.1|	hypothetical protein SORBIDRAFT_07g005390 [Sorghum bicolor] gb|EES14669.1| hypothetical protein SORBIDRAFT_07g005390 [Sorghum bicolor]
isotig00729	isogroup00035	4486	ref|XP_002445174.1|	hypothetical protein SORBIDRAFT_07g005390 [Sorghum bicolor] gb|EES14669.1| hypothetical protein SORBIDRAFT_07g005390 [Sorghum bicolor]
isotig00730	isogroup00035	4486	ref|XP_002445174.1|	hypothetical protein SORBIDRAFT_07g005390 [Sorghum bicolor] gb|EES14669.1| hypothetical protein SORBIDRAFT_07g005390 [Sorghum bicolor]
isotig00731	isogroup00035	4337	ref|XP_002445174.1|	hypothetical protein SORBIDRAFT_07g005390 [Sorghum bicolor] gb|EES14669.1| hypothetical protein SORBIDRAFT_07g005390 [Sorghum bicolor]
isotig00732	isogroup00035	4486	ref|XP_002445174.1|	hypothetical protein SORBIDRAFT_07g005390 [Sorghum bicolor] gb|EES14669.1| hypothetical protein SORBIDRAFT_07g005390 [Sorghum bicolor]
isotig00733	isogroup00035	4486	ref|XP_002445174.1|	hypothetical protein SORBIDRAFT_07g005390 [Sorghum bicolor] gb|EES14669.1| hypothetical protein SORBIDRAFT_07g005390 [Sorghum bicolor]
isotig00734	isogroup00035	4489	ref|XP_002445174.1|	hypothetical protein SORBIDRAFT_07g005390 [Sorghum bicolor] gb|EES14669.1| hypothetical protein SORBIDRAFT_07g005390 [Sorghum bicolor]
isotig00735	isogroup00035	4489	ref|XP_002445174.1|	hypothetical protein SORBIDRAFT_07g005390 [Sorghum bicolor] gb|EES14669.1| hypothetical protein SORBIDRAFT_07g005390 [Sorghum bicolor]
isotig00736	isogroup00035	4489	ref|XP_002445174.1|	hypothetical protein SORBIDRAFT_07g005390 [Sorghum bicolor] gb|EES14669.1| hypothetical protein SORBIDRAFT_07g005390 [Sorghum bicolor]
isotig00737	isogroup00035	4486	ref|XP_002445174.1|	hypothetical protein SORBIDRAFT_07g005390 [Sorghum bicolor] gb|EES14669.1| hypothetical protein SORBIDRAFT_07g005390 [Sorghum bicolor]
isotig00738	isogroup00035	4337	ref|XP_002445174.1|	hypothetical protein SORBIDRAFT_07g005390 [Sorghum bicolor] gb|EES14669.1| hypothetical protein SORBIDRAFT_07g005390 [Sorghum bicolor]
isotig00739	isogroup00035	4486	ref|XP_002445174.1|	hypothetical protein SORBIDRAFT_07g005390 [Sorghum bicolor] gb|EES14669.1| hypothetical protein SORBIDRAFT_07g005390 [Sorghum bicolor]
isotig00740	isogroup00035	4486	ref|XP_002445174.1|	hypothetical protein SORBIDRAFT_07g005390 [Sorghum bicolor] gb|EES14669.1| hypothetical protein SORBIDRAFT_07g005390 [Sorghum bicolor]
isotig00741	isogroup00035	4337	ref|XP_002445174.1|	hypothetical protein SORBIDRAFT_07g005390 [Sorghum bicolor] gb|EES14669.1| hypothetical protein SORBIDRAFT_07g005390 [Sorghum bicolor]
isotig00742	isogroup00035	4486	ref|XP_002445174.1|	hypothetical protein SORBIDRAFT_07g005390 [Sorghum bicolor] gb|EES14669.1| hypothetical protein SORBIDRAFT_07g005390 [Sorghum bicolor]
isotig00743	isogroup00035	4489	ref|XP_002445174.1|	hypothetical protein SORBIDRAFT_07g005390 [Sorghum bicolor] gb|EES14669.1| hypothetical protein SORBIDRAFT_07g005390 [Sorghum bicolor]
isotig00744	isogroup00035	4489	ref|XP_002445174.1|	hypothetical protein SORBIDRAFT_07g005390 [Sorghum bicolor] gb|EES14669.1| hypothetical protein SORBIDRAFT_07g005390 [Sorghum bicolor]
isotig00745	isogroup00035	4337	ref|XP_002445174.1|	hypothetical protein SORBIDRAFT_07g005390 [Sorghum bicolor] gb|EES14669.1| hypothetical protein SORBIDRAFT_07g005390 [Sorghum bicolor]
isotig00746	isogroup00035	4337	ref|XP_002445174.1|	hypothetical protein SORBIDRAFT_07g005390 [Sorghum bicolor] gb|EES14669.1| hypothetical protein SORBIDRAFT_07g005390 [Sorghum bicolor]
isotig00747	isogroup00035	4337	ref|XP_002445174.1|	hypothetical protein SORBIDRAFT_07g005390 [Sorghum bicolor] gb|EES14669.1| hypothetical protein SORBIDRAFT_07g005390 [Sorghum bicolor]
isotig00748	isogroup00035	4337	ref|XP_002445174.1|	hypothetical protein SORBIDRAFT_07g005390 [Sorghum bicolor] gb|EES14669.1| hypothetical protein SORBIDRAFT_07g005390 [Sorghum bicolor]
isotig00749	isogroup00035	4337	ref|XP_002445174.1|	hypothetical protein SORBIDRAFT_07g005390 [Sorghum bicolor] gb|EES14669.1| hypothetical protein SORBIDRAFT_07g005390 [Sorghum bicolor]
isotig00750	isogroup00035	3362	ref|XP_002445174.1|	hypothetical protein SORBIDRAFT_07g005390 [Sorghum bicolor] gb|EES14669.1| hypothetical protein SORBIDRAFT_07g005390 [Sorghum bicolor]
isotig00751	isogroup00035	3362	ref|XP_002445174.1|	hypothetical protein SORBIDRAFT_07g005390 [Sorghum bicolor] gb|EES14669.1| hypothetical protein SORBIDRAFT_07g005390 [Sorghum bicolor]
isotig00752	isogroup00035	3365	ref|XP_002445174.1|	hypothetical protein SORBIDRAFT_07g005390 [Sorghum bicolor] gb|EES14669.1| hypothetical protein SORBIDRAFT_07g005390 [Sorghum bicolor]
isotig00753	isogroup00035	3362	ref|XP_002445174.1|	hypothetical protein SORBIDRAFT_07g005390 [Sorghum bicolor] gb|EES14669.1| hypothetical protein SORBIDRAFT_07g005390 [Sorghum bicolor]
isotig00754	isogroup00035	3362	ref|XP_002445174.1|	hypothetical protein SORBIDRAFT_07g005390 [Sorghum bicolor] gb|EES14669.1| hypothetical protein SORBIDRAFT_07g005390 [Sorghum bicolor]
isotig00755	isogroup00035	3362	ref|XP_002445174.1|	hypothetical protein SORBIDRAFT_07g005390 [Sorghum bicolor] gb|EES14669.1| hypothetical protein SORBIDRAFT_07g005390 [Sorghum bicolor]
isotig00756	isogroup00035	3362	ref|XP_002445174.1|	hypothetical protein SORBIDRAFT_07g005390 [Sorghum bicolor] gb|EES14669.1| hypothetical protein SORBIDRAFT_07g005390 [Sorghum bicolor]
isotig00757	isogroup00035	3365	ref|XP_002445174.1|	hypothetical protein SORBIDRAFT_07g005390 [Sorghum bicolor] gb|EES14669.1| hypothetical protein SORBIDRAFT_07g005390 [Sorghum bicolor]
isotig00758	isogroup00035	3365	ref|XP_002445174.1|	hypothetical protein SORBIDRAFT_07g005390 [Sorghum bicolor] gb|EES14669.1| hypothetical protein SORBIDRAFT_07g005390 [Sorghum bicolor]
isotig00759	isogroup00035	3362	ref|XP_002445174.1|	hypothetical protein SORBIDRAFT_07g005390 [Sorghum bicolor] gb|EES14669.1| hypothetical protein SORBIDRAFT_07g005390 [Sorghum bicolor]
isotig00760	isogroup00035	3362	ref|XP_002445174.1|	hypothetical protein SORBIDRAFT_07g005390 [Sorghum bicolor] gb|EES14669.1| hypothetical protein SORBIDRAFT_07g005390 [Sorghum bicolor]
isotig00761	isogroup00035	3363	ref|XP_002445174.1|	hypothetical protein SORBIDRAFT_07g005390 [Sorghum bicolor] gb|EES14669.1| hypothetical protein SORBIDRAFT_07g005390 [Sorghum bicolor]
isotig00762	isogroup00035	3362	ref|XP_002445174.1|	hypothetical protein SORBIDRAFT_07g005390 [Sorghum bicolor] gb|EES14669.1| hypothetical protein SORBIDRAFT_07g005390 [Sorghum bicolor]
isotig00763	isogroup00035	3213	ref|XP_002445174.1|	hypothetical protein SORBIDRAFT_07g005390 [Sorghum bicolor] gb|EES14669.1| hypothetical protein SORBIDRAFT_07g005390 [Sorghum bicolor]
isotig00764	isogroup00035	3363	ref|XP_002445174.1|	hypothetical protein SORBIDRAFT_07g005390 [Sorghum bicolor] gb|EES14669.1| hypothetical protein SORBIDRAFT_07g005390 [Sorghum bicolor]
isotig00765	isogroup00035	3362	ref|XP_002445174.1|	hypothetical protein SORBIDRAFT_07g005390 [Sorghum bicolor] gb|EES14669.1| hypothetical protein SORBIDRAFT_07g005390 [Sorghum bicolor]
isotig00766	isogroup00035	3365	ref|XP_002445174.1|	hypothetical protein SORBIDRAFT_07g005390 [Sorghum bicolor] gb|EES14669.1| hypothetical protein SORBIDRAFT_07g005390 [Sorghum bicolor]
isotig00767	isogroup00035	3366	ref|XP_002445174.1|	hypothetical protein SORBIDRAFT_07g005390 [Sorghum bicolor] gb|EES14669.1| hypothetical protein SORBIDRAFT_07g005390 [Sorghum bicolor]
isotig00768	isogroup00035	3365	ref|XP_002445174.1|	hypothetical protein SORBIDRAFT_07g005390 [Sorghum bicolor] gb|EES14669.1| hypothetical protein SORBIDRAFT_07g005390 [Sorghum bicolor]
isotig00769	isogroup00035	3362	ref|XP_002445174.1|	hypothetical protein SORBIDRAFT_07g005390 [Sorghum bicolor] gb|EES14669.1| hypothetical protein SORBIDRAFT_07g005390 [Sorghum bicolor]
isotig00770	isogroup00035	3213	ref|XP_002445174.1|	hypothetical protein SORBIDRAFT_07g005390 [Sorghum bicolor] gb|EES14669.1| hypothetical protein SORBIDRAFT_07g005390 [Sorghum bicolor]
isotig00771	isogroup00035	3362	ref|XP_002445174.1|	hypothetical protein SORBIDRAFT_07g005390 [Sorghum bicolor] gb|EES14669.1| hypothetical protein SORBIDRAFT_07g005390 [Sorghum bicolor]
isotig00772	isogroup00035	3363	ref|XP_002445174.1|	hypothetical protein SORBIDRAFT_07g005390 [Sorghum bicolor] gb|EES14669.1| hypothetical protein SORBIDRAFT_07g005390 [Sorghum bicolor]
isotig00773	isogroup00035	3213	ref|XP_002445174.1|	hypothetical protein SORBIDRAFT_07g005390 [Sorghum bicolor] gb|EES14669.1| hypothetical protein SORBIDRAFT_07g005390 [Sorghum bicolor]
isotig00774	isogroup00035	3363	ref|XP_002445174.1|	hypothetical protein SORBIDRAFT_07g005390 [Sorghum bicolor] gb|EES14669.1| hypothetical protein SORBIDRAFT_07g005390 [Sorghum bicolor]
isotig00775	isogroup00035	3365	ref|XP_002445174.1|	hypothetical protein SORBIDRAFT_07g005390 [Sorghum bicolor] gb|EES14669.1| hypothetical protein SORBIDRAFT_07g005390 [Sorghum bicolor]
isotig00776	isogroup00035	3366	ref|XP_002445174.1|	hypothetical protein SORBIDRAFT_07g005390 [Sorghum bicolor] gb|EES14669.1| hypothetical protein SORBIDRAFT_07g005390 [Sorghum bicolor]
isotig00777	isogroup00035	3213	ref|XP_002445174.1|	hypothetical protein SORBIDRAFT_07g005390 [Sorghum bicolor] gb|EES14669.1| hypothetical protein SORBIDRAFT_07g005390 [Sorghum bicolor]
isotig00778	isogroup00035	3214	ref|XP_002445174.1|	hypothetical protein SORBIDRAFT_07g005390 [Sorghum bicolor] gb|EES14669.1| hypothetical protein SORBIDRAFT_07g005390 [Sorghum bicolor]
isotig00779	isogroup00035	3213	ref|XP_002445174.1|	hypothetical protein SORBIDRAFT_07g005390 [Sorghum bicolor] gb|EES14669.1| hypothetical protein SORBIDRAFT_07g005390 [Sorghum bicolor]
isotig00780	isogroup00035	3213	ref|XP_002445174.1|	hypothetical protein SORBIDRAFT_07g005390 [Sorghum bicolor] gb|EES14669.1| hypothetical protein SORBIDRAFT_07g005390 [Sorghum bicolor]
isotig00781	isogroup00035	3214	ref|XP_002445174.1|	hypothetical protein SORBIDRAFT_07g005390 [Sorghum bicolor] gb|EES14669.1| hypothetical protein SORBIDRAFT_07g005390 [Sorghum bicolor]
isotig00782	isogroup00035	2679	ref|XP_003557442.1|	PREDICTED: uncharacterized protein LOC100821136 [Brachypodium distachyon]
isotig00783	isogroup00036	3822	tpg|DAA36802.1|	TPA: hypothetical protein ZEAMMB73_069890 [Zea mays]
isotig00784	isogroup00036	3822	ref|XP_002447382.1|	hypothetical protein SORBIDRAFT_06g034070 [Sorghum bicolor] gb|EES11710.1| hypothetical protein SORBIDRAFT_06g034070 [Sorghum bicolor]
isotig00785	isogroup00036	3822	tpg|DAA36802.1|	TPA: hypothetical protein ZEAMMB73_069890 [Zea mays]
isotig00786	isogroup00036	3822	ref|XP_002447382.1|	hypothetical protein SORBIDRAFT_06g034070 [Sorghum bicolor] gb|EES11710.1| hypothetical protein SORBIDRAFT_06g034070 [Sorghum bicolor]
isotig00787	isogroup00036	3822	ref|XP_002447382.1|	hypothetical protein SORBIDRAFT_06g034070 [Sorghum bicolor] gb|EES11710.1| hypothetical protein SORBIDRAFT_06g034070 [Sorghum bicolor]
isotig00788	isogroup00036	3822	ref|XP_002447382.1|	hypothetical protein SORBIDRAFT_06g034070 [Sorghum bicolor] gb|EES11710.1| hypothetical protein SORBIDRAFT_06g034070 [Sorghum bicolor]
isotig00789	isogroup00036	3813	tpg|DAA36802.1|	TPA: hypothetical protein ZEAMMB73_069890 [Zea mays]
isotig00790	isogroup00036	3811	ref|XP_003539945.1|	PREDICTED: multiple C2 and transmembrane domain-containing protein 1-like [Glycine max]
isotig00791	isogroup00036	3813	tpg|DAA36802.1|	TPA: hypothetical protein ZEAMMB73_069890 [Zea mays]
isotig00792	isogroup00036	3811	ref|XP_003539945.1|	PREDICTED: multiple C2 and transmembrane domain-containing protein 1-like [Glycine max]
isotig00793	isogroup00036	3813	ref|XP_002447382.1|	hypothetical protein SORBIDRAFT_06g034070 [Sorghum bicolor] gb|EES11710.1| hypothetical protein SORBIDRAFT_06g034070 [Sorghum bicolor]
isotig00794	isogroup00036	3813	ref|XP_002447382.1|	hypothetical protein SORBIDRAFT_06g034070 [Sorghum bicolor] gb|EES11710.1| hypothetical protein SORBIDRAFT_06g034070 [Sorghum bicolor]
isotig00795	isogroup00036	3647	tpg|DAA36802.1|	TPA: hypothetical protein ZEAMMB73_069890 [Zea mays]
isotig00796	isogroup00036	3647	tpg|DAA36802.1|	TPA: hypothetical protein ZEAMMB73_069890 [Zea mays]
isotig00797	isogroup00036	3647	tpg|DAA36802.1|	TPA: hypothetical protein ZEAMMB73_069890 [Zea mays]
isotig00798	isogroup00036	3647	tpg|DAA36802.1|	TPA: hypothetical protein ZEAMMB73_069890 [Zea mays]
isotig00799	isogroup00036	3647	tpg|DAA36802.1|	TPA: hypothetical protein ZEAMMB73_069890 [Zea mays]
isotig00800	isogroup00036	3647	tpg|DAA36802.1|	TPA: hypothetical protein ZEAMMB73_069890 [Zea mays]
isotig00801	isogroup00036	3638	tpg|DAA36802.1|	TPA: hypothetical protein ZEAMMB73_069890 [Zea mays]
isotig00802	isogroup00036	3636	ref|XP_003539945.1|	PREDICTED: multiple C2 and transmembrane domain-containing protein 1-like [Glycine max]
isotig00803	isogroup00036	3638	tpg|DAA36802.1|	TPA: hypothetical protein ZEAMMB73_069890 [Zea mays]
isotig00804	isogroup00036	3636	ref|XP_003539945.1|	PREDICTED: multiple C2 and transmembrane domain-containing protein 1-like [Glycine max]
isotig00805	isogroup00036	3648	tpg|DAA36802.1|	TPA: hypothetical protein ZEAMMB73_069890 [Zea mays]
isotig00806	isogroup00036	3648	tpg|DAA36802.1|	TPA: hypothetical protein ZEAMMB73_069890 [Zea mays]
isotig00807	isogroup00036	3648	tpg|DAA36802.1|	TPA: hypothetical protein ZEAMMB73_069890 [Zea mays]
isotig00808	isogroup00036	3638	tpg|DAA36802.1|	TPA: hypothetical protein ZEAMMB73_069890 [Zea mays]
isotig00809	isogroup00036	3648	tpg|DAA36802.1|	TPA: hypothetical protein ZEAMMB73_069890 [Zea mays]
isotig00810	isogroup00036	3638	tpg|DAA36802.1|	TPA: hypothetical protein ZEAMMB73_069890 [Zea mays]
isotig00811	isogroup00036	3648	tpg|DAA36802.1|	TPA: hypothetical protein ZEAMMB73_069890 [Zea mays]
isotig00812	isogroup00036	3648	tpg|DAA36802.1|	TPA: hypothetical protein ZEAMMB73_069890 [Zea mays]
isotig00813	isogroup00036	3639	tpg|DAA36802.1|	TPA: hypothetical protein ZEAMMB73_069890 [Zea mays]
isotig00814	isogroup00036	3637	ref|XP_003539945.1|	PREDICTED: multiple C2 and transmembrane domain-containing protein 1-like [Glycine max]
isotig00815	isogroup00036	3639	tpg|DAA36802.1|	TPA: hypothetical protein ZEAMMB73_069890 [Zea mays]
isotig00816	isogroup00036	3637	ref|XP_003539945.1|	PREDICTED: multiple C2 and transmembrane domain-containing protein 1-like [Glycine max]
isotig00817	isogroup00036	3639	tpg|DAA36802.1|	TPA: hypothetical protein ZEAMMB73_069890 [Zea mays]
isotig00818	isogroup00036	3639	tpg|DAA36802.1|	TPA: hypothetical protein ZEAMMB73_069890 [Zea mays]
isotig00819	isogroup00036	3595	tpg|DAA36802.1|	TPA: hypothetical protein ZEAMMB73_069890 [Zea mays]
isotig00820	isogroup00036	3595	ref|XP_002447382.1|	hypothetical protein SORBIDRAFT_06g034070 [Sorghum bicolor] gb|EES11710.1| hypothetical protein SORBIDRAFT_06g034070 [Sorghum bicolor]
isotig00821	isogroup00036	3595	tpg|DAA36802.1|	TPA: hypothetical protein ZEAMMB73_069890 [Zea mays]
isotig00822	isogroup00036	3595	ref|XP_002447382.1|	hypothetical protein SORBIDRAFT_06g034070 [Sorghum bicolor] gb|EES11710.1| hypothetical protein SORBIDRAFT_06g034070 [Sorghum bicolor]
isotig00823	isogroup00036	3595	ref|XP_002447382.1|	hypothetical protein SORBIDRAFT_06g034070 [Sorghum bicolor] gb|EES11710.1| hypothetical protein SORBIDRAFT_06g034070 [Sorghum bicolor]
isotig00824	isogroup00036	3595	ref|XP_002447382.1|	hypothetical protein SORBIDRAFT_06g034070 [Sorghum bicolor] gb|EES11710.1| hypothetical protein SORBIDRAFT_06g034070 [Sorghum bicolor]
isotig00825	isogroup00036	3586	tpg|DAA36802.1|	TPA: hypothetical protein ZEAMMB73_069890 [Zea mays]
isotig00826	isogroup00036	3584	ref|XP_003539945.1|	PREDICTED: multiple C2 and transmembrane domain-containing protein 1-like [Glycine max]
isotig00827	isogroup00036	3586	tpg|DAA36802.1|	TPA: hypothetical protein ZEAMMB73_069890 [Zea mays]
isotig00828	isogroup00036	3584	ref|XP_003539945.1|	PREDICTED: multiple C2 and transmembrane domain-containing protein 1-like [Glycine max]
isotig00829	isogroup00036	3586	ref|XP_002447382.1|	hypothetical protein SORBIDRAFT_06g034070 [Sorghum bicolor] gb|EES11710.1| hypothetical protein SORBIDRAFT_06g034070 [Sorghum bicolor]
isotig00830	isogroup00036	3586	ref|XP_002447382.1|	hypothetical protein SORBIDRAFT_06g034070 [Sorghum bicolor] gb|EES11710.1| hypothetical protein SORBIDRAFT_06g034070 [Sorghum bicolor]
isotig00831	isogroup00036	1786	ref|XP_002447382.1|	hypothetical protein SORBIDRAFT_06g034070 [Sorghum bicolor] gb|EES11710.1| hypothetical protein SORBIDRAFT_06g034070 [Sorghum bicolor]
isotig00832	isogroup00036	1703	tpg|DAA36802.1|	TPA: hypothetical protein ZEAMMB73_069890 [Zea mays]
isotig00833	isogroup00036	1611	tpg|DAA36802.1|	TPA: hypothetical protein ZEAMMB73_069890 [Zea mays]
isotig00834	isogroup00036	1612	tpg|DAA36802.1|	TPA: hypothetical protein ZEAMMB73_069890 [Zea mays]
isotig00835	isogroup00036	1559	tpg|DAA36802.1|	TPA: hypothetical protein ZEAMMB73_069890 [Zea mays]
isotig00836	isogroup00036	1528	tpg|DAA36802.1|	TPA: hypothetical protein ZEAMMB73_069890 [Zea mays]
isotig00837	isogroup00036	1529	tpg|DAA36802.1|	TPA: hypothetical protein ZEAMMB73_069890 [Zea mays]
isotig00838	isogroup00036	1476	tpg|DAA36802.1|	TPA: hypothetical protein ZEAMMB73_069890 [Zea mays]
isotig00839	isogroup00036	786	ref|XP_002447382.1|	hypothetical protein SORBIDRAFT_06g034070 [Sorghum bicolor] gb|EES11710.1| hypothetical protein SORBIDRAFT_06g034070 [Sorghum bicolor]
isotig00840	isogroup00037	2966	ref|NP_001053083.1|	Os04g0476800 [Oryza sativa Japonica Group] emb|CAE05860.1| OSJNBa0044K18.2 [Oryza sativa Japonica Group] dbj|BAF14997.1| Os04g0476800 [Oryza sativa Japonica Group] gb|EAZ31087.1| hypothetical protein OsJ_15184 [Oryza sativa Japonica Group]
isotig00841	isogroup00037	2964	ref|XP_003581355.1|	PREDICTED: uncharacterized protein LOC100838446 [Brachypodium distachyon]
isotig00842	isogroup00037	2967	dbj|BAJ86169.1|	predicted protein [Hordeum vulgare subsp. vulgare]
isotig00843	isogroup00037	2965	dbj|BAJ86169.1|	predicted protein [Hordeum vulgare subsp. vulgare]
isotig00844	isogroup00037	2966	ref|NP_001053083.1|	Os04g0476800 [Oryza sativa Japonica Group] emb|CAE05860.1| OSJNBa0044K18.2 [Oryza sativa Japonica Group] dbj|BAF14997.1| Os04g0476800 [Oryza sativa Japonica Group] gb|EAZ31087.1| hypothetical protein OsJ_15184 [Oryza sativa Japonica Group]
isotig00845	isogroup00037	2964	ref|XP_003581355.1|	PREDICTED: uncharacterized protein LOC100838446 [Brachypodium distachyon]
isotig00846	isogroup00037	2966	ref|XP_003581355.1|	PREDICTED: uncharacterized protein LOC100838446 [Brachypodium distachyon]
isotig00847	isogroup00037	2967	dbj|BAJ86169.1|	predicted protein [Hordeum vulgare subsp. vulgare]
isotig00848	isogroup00037	2966	ref|NP_001053083.1|	Os04g0476800 [Oryza sativa Japonica Group] emb|CAE05860.1| OSJNBa0044K18.2 [Oryza sativa Japonica Group] dbj|BAF14997.1| Os04g0476800 [Oryza sativa Japonica Group] gb|EAZ31087.1| hypothetical protein OsJ_15184 [Oryza sativa Japonica Group]
isotig00849	isogroup00037	2950	ref|XP_003581355.1|	PREDICTED: uncharacterized protein LOC100838446 [Brachypodium distachyon]
isotig00850	isogroup00037	2948	ref|XP_003581355.1|	PREDICTED: uncharacterized protein LOC100838446 [Brachypodium distachyon]
isotig00851	isogroup00037	2951	dbj|BAJ86169.1|	predicted protein [Hordeum vulgare subsp. vulgare]
isotig00852	isogroup00037	2949	dbj|BAJ86169.1|	predicted protein [Hordeum vulgare subsp. vulgare]
isotig00853	isogroup00037	2950	ref|NP_001053083.1|	Os04g0476800 [Oryza sativa Japonica Group] emb|CAE05860.1| OSJNBa0044K18.2 [Oryza sativa Japonica Group] dbj|BAF14997.1| Os04g0476800 [Oryza sativa Japonica Group] gb|EAZ31087.1| hypothetical protein OsJ_15184 [Oryza sativa Japonica Group]
isotig00854	isogroup00037	2948	ref|XP_003581355.1|	PREDICTED: uncharacterized protein LOC100838446 [Brachypodium distachyon]
isotig00855	isogroup00037	2950	ref|XP_003581355.1|	PREDICTED: uncharacterized protein LOC100838446 [Brachypodium distachyon]
isotig00856	isogroup00037	2951	dbj|BAJ86169.1|	predicted protein [Hordeum vulgare subsp. vulgare]
isotig00857	isogroup00037	2950	ref|NP_001053083.1|	Os04g0476800 [Oryza sativa Japonica Group] emb|CAE05860.1| OSJNBa0044K18.2 [Oryza sativa Japonica Group] dbj|BAF14997.1| Os04g0476800 [Oryza sativa Japonica Group] gb|EAZ31087.1| hypothetical protein OsJ_15184 [Oryza sativa Japonica Group]
isotig00858	isogroup00037	2872	ref|NP_001053083.1|	Os04g0476800 [Oryza sativa Japonica Group] emb|CAE05860.1| OSJNBa0044K18.2 [Oryza sativa Japonica Group] dbj|BAF14997.1| Os04g0476800 [Oryza sativa Japonica Group] gb|EAZ31087.1| hypothetical protein OsJ_15184 [Oryza sativa Japonica Group]
isotig00859	isogroup00037	2870	ref|XP_003581355.1|	PREDICTED: uncharacterized protein LOC100838446 [Brachypodium distachyon]
isotig00860	isogroup00037	2873	dbj|BAJ86169.1|	predicted protein [Hordeum vulgare subsp. vulgare]
isotig00861	isogroup00037	2871	dbj|BAJ86169.1|	predicted protein [Hordeum vulgare subsp. vulgare]
isotig00862	isogroup00037	2872	ref|NP_001053083.1|	Os04g0476800 [Oryza sativa Japonica Group] emb|CAE05860.1| OSJNBa0044K18.2 [Oryza sativa Japonica Group] dbj|BAF14997.1| Os04g0476800 [Oryza sativa Japonica Group] gb|EAZ31087.1| hypothetical protein OsJ_15184 [Oryza sativa Japonica Group]
isotig00863	isogroup00037	2870	ref|XP_003581355.1|	PREDICTED: uncharacterized protein LOC100838446 [Brachypodium distachyon]
isotig00864	isogroup00037	2872	ref|XP_003581355.1|	PREDICTED: uncharacterized protein LOC100838446 [Brachypodium distachyon]
isotig00865	isogroup00037	2873	dbj|BAJ86169.1|	predicted protein [Hordeum vulgare subsp. vulgare]
isotig00866	isogroup00037	2872	ref|NP_001053083.1|	Os04g0476800 [Oryza sativa Japonica Group] emb|CAE05860.1| OSJNBa0044K18.2 [Oryza sativa Japonica Group] dbj|BAF14997.1| Os04g0476800 [Oryza sativa Japonica Group] gb|EAZ31087.1| hypothetical protein OsJ_15184 [Oryza sativa Japonica Group]
isotig00867	isogroup00037	2856	ref|XP_003581355.1|	PREDICTED: uncharacterized protein LOC100838446 [Brachypodium distachyon]
isotig00868	isogroup00037	2854	ref|XP_003581355.1|	PREDICTED: uncharacterized protein LOC100838446 [Brachypodium distachyon]
isotig00869	isogroup00037	2857	dbj|BAJ86169.1|	predicted protein [Hordeum vulgare subsp. vulgare]
isotig00870	isogroup00037	2855	dbj|BAJ86169.1|	predicted protein [Hordeum vulgare subsp. vulgare]
isotig00871	isogroup00037	2856	ref|NP_001053083.1|	Os04g0476800 [Oryza sativa Japonica Group] emb|CAE05860.1| OSJNBa0044K18.2 [Oryza sativa Japonica Group] dbj|BAF14997.1| Os04g0476800 [Oryza sativa Japonica Group] gb|EAZ31087.1| hypothetical protein OsJ_15184 [Oryza sativa Japonica Group]
isotig00872	isogroup00037	2854	ref|XP_003581355.1|	PREDICTED: uncharacterized protein LOC100838446 [Brachypodium distachyon]
isotig00873	isogroup00037	2856	ref|XP_003581355.1|	PREDICTED: uncharacterized protein LOC100838446 [Brachypodium distachyon]
isotig00874	isogroup00037	2857	dbj|BAJ86169.1|	predicted protein [Hordeum vulgare subsp. vulgare]
isotig00875	isogroup00037	2856	ref|NP_001053083.1|	Os04g0476800 [Oryza sativa Japonica Group] emb|CAE05860.1| OSJNBa0044K18.2 [Oryza sativa Japonica Group] dbj|BAF14997.1| Os04g0476800 [Oryza sativa Japonica Group] gb|EAZ31087.1| hypothetical protein OsJ_15184 [Oryza sativa Japonica Group]
isotig00876	isogroup00037	2285	ref|NP_001053083.1|	Os04g0476800 [Oryza sativa Japonica Group] emb|CAE05860.1| OSJNBa0044K18.2 [Oryza sativa Japonica Group] dbj|BAF14997.1| Os04g0476800 [Oryza sativa Japonica Group] gb|EAZ31087.1| hypothetical protein OsJ_15184 [Oryza sativa Japonica Group]
isotig00877	isogroup00037	2286	dbj|BAJ86169.1|	predicted protein [Hordeum vulgare subsp. vulgare]
isotig00878	isogroup00037	2285	ref|NP_001053083.1|	Os04g0476800 [Oryza sativa Japonica Group] emb|CAE05860.1| OSJNBa0044K18.2 [Oryza sativa Japonica Group] dbj|BAF14997.1| Os04g0476800 [Oryza sativa Japonica Group] gb|EAZ31087.1| hypothetical protein OsJ_15184 [Oryza sativa Japonica Group]
isotig00879	isogroup00037	2269	ref|XP_003581355.1|	PREDICTED: uncharacterized protein LOC100838446 [Brachypodium distachyon]
isotig00880	isogroup00037	2270	dbj|BAJ86169.1|	predicted protein [Hordeum vulgare subsp. vulgare]
isotig00881	isogroup00037	2269	ref|NP_001053083.1|	Os04g0476800 [Oryza sativa Japonica Group] emb|CAE05860.1| OSJNBa0044K18.2 [Oryza sativa Japonica Group] dbj|BAF14997.1| Os04g0476800 [Oryza sativa Japonica Group] gb|EAZ31087.1| hypothetical protein OsJ_15184 [Oryza sativa Japonica Group]
isotig00882	isogroup00037	640	emb|CAE00864.1|	TA4 protein [Oryza sativa Japonica Group]
isotig00883	isogroup00037	546	emb|CAE00864.1|	TA4 protein [Oryza sativa Japonica Group]
isotig00884	isogroup00038	2948	ref|XP_002451281.1|	hypothetical protein SORBIDRAFT_05g026900 [Sorghum bicolor] gb|EES10269.1| hypothetical protein SORBIDRAFT_05g026900 [Sorghum bicolor]
isotig00885	isogroup00038	2936	ref|XP_002451281.1|	hypothetical protein SORBIDRAFT_05g026900 [Sorghum bicolor] gb|EES10269.1| hypothetical protein SORBIDRAFT_05g026900 [Sorghum bicolor]
isotig00886	isogroup00038	2947	ref|XP_002451281.1|	hypothetical protein SORBIDRAFT_05g026900 [Sorghum bicolor] gb|EES10269.1| hypothetical protein SORBIDRAFT_05g026900 [Sorghum bicolor]
isotig00887	isogroup00038	2935	ref|XP_002451281.1|	hypothetical protein SORBIDRAFT_05g026900 [Sorghum bicolor] gb|EES10269.1| hypothetical protein SORBIDRAFT_05g026900 [Sorghum bicolor]
isotig00888	isogroup00038	2924	ref|XP_002451281.1|	hypothetical protein SORBIDRAFT_05g026900 [Sorghum bicolor] gb|EES10269.1| hypothetical protein SORBIDRAFT_05g026900 [Sorghum bicolor]
isotig00889	isogroup00038	2912	ref|XP_002451281.1|	hypothetical protein SORBIDRAFT_05g026900 [Sorghum bicolor] gb|EES10269.1| hypothetical protein SORBIDRAFT_05g026900 [Sorghum bicolor]
isotig00890	isogroup00038	2923	ref|XP_002451281.1|	hypothetical protein SORBIDRAFT_05g026900 [Sorghum bicolor] gb|EES10269.1| hypothetical protein SORBIDRAFT_05g026900 [Sorghum bicolor]
isotig00891	isogroup00038	2911	ref|XP_002451281.1|	hypothetical protein SORBIDRAFT_05g026900 [Sorghum bicolor] gb|EES10269.1| hypothetical protein SORBIDRAFT_05g026900 [Sorghum bicolor]
isotig00892	isogroup00038	2904	ref|NP_001147782.1|	cyclopropane fatty acid synthase [Zea mays] gb|ACG28704.1| cyclopropane fatty acid synthase [Zea mays] tpg|DAA40492.1| TPA: cyclopropane fatty acid synthase [Zea mays]
isotig00893	isogroup00038	2892	ref|NP_001147782.1|	cyclopropane fatty acid synthase [Zea mays] gb|ACG28704.1| cyclopropane fatty acid synthase [Zea mays] tpg|DAA40492.1| TPA: cyclopropane fatty acid synthase [Zea mays]
isotig00894	isogroup00038	2885	ref|XP_002451281.1|	hypothetical protein SORBIDRAFT_05g026900 [Sorghum bicolor] gb|EES10269.1| hypothetical protein SORBIDRAFT_05g026900 [Sorghum bicolor]
isotig00895	isogroup00038	2855	ref|XP_002451281.1|	hypothetical protein SORBIDRAFT_05g026900 [Sorghum bicolor] gb|EES10269.1| hypothetical protein SORBIDRAFT_05g026900 [Sorghum bicolor]
isotig00896	isogroup00038	2409	ref|XP_002451281.1|	hypothetical protein SORBIDRAFT_05g026900 [Sorghum bicolor] gb|EES10269.1| hypothetical protein SORBIDRAFT_05g026900 [Sorghum bicolor]
isotig00897	isogroup00038	2397	ref|XP_002451281.1|	hypothetical protein SORBIDRAFT_05g026900 [Sorghum bicolor] gb|EES10269.1| hypothetical protein SORBIDRAFT_05g026900 [Sorghum bicolor]
isotig00898	isogroup00038	2408	ref|XP_002451281.1|	hypothetical protein SORBIDRAFT_05g026900 [Sorghum bicolor] gb|EES10269.1| hypothetical protein SORBIDRAFT_05g026900 [Sorghum bicolor]
isotig00899	isogroup00038	2396	ref|XP_002451281.1|	hypothetical protein SORBIDRAFT_05g026900 [Sorghum bicolor] gb|EES10269.1| hypothetical protein SORBIDRAFT_05g026900 [Sorghum bicolor]
isotig00900	isogroup00038	2341	ref|NP_001147782.1|	cyclopropane fatty acid synthase [Zea mays] gb|ACG28704.1| cyclopropane fatty acid synthase [Zea mays] tpg|DAA40492.1| TPA: cyclopropane fatty acid synthase [Zea mays]
isotig00901	isogroup00038	2329	ref|NP_001147782.1|	cyclopropane fatty acid synthase [Zea mays] gb|ACG28704.1| cyclopropane fatty acid synthase [Zea mays] tpg|DAA40492.1| TPA: cyclopropane fatty acid synthase [Zea mays]
isotig00902	isogroup00038	2322	ref|XP_002451281.1|	hypothetical protein SORBIDRAFT_05g026900 [Sorghum bicolor] gb|EES10269.1| hypothetical protein SORBIDRAFT_05g026900 [Sorghum bicolor]
isotig00903	isogroup00038	2292	ref|XP_002451281.1|	hypothetical protein SORBIDRAFT_05g026900 [Sorghum bicolor] gb|EES10269.1| hypothetical protein SORBIDRAFT_05g026900 [Sorghum bicolor]
isotig00904	isogroup00038	2094	ref|XP_002451281.1|	hypothetical protein SORBIDRAFT_05g026900 [Sorghum bicolor] gb|EES10269.1| hypothetical protein SORBIDRAFT_05g026900 [Sorghum bicolor]
isotig00905	isogroup00038	1708	ref|XP_002451281.1|	hypothetical protein SORBIDRAFT_05g026900 [Sorghum bicolor] gb|EES10269.1| hypothetical protein SORBIDRAFT_05g026900 [Sorghum bicolor]
isotig00906	isogroup00038	1684	ref|XP_002451281.1|	hypothetical protein SORBIDRAFT_05g026900 [Sorghum bicolor] gb|EES10269.1| hypothetical protein SORBIDRAFT_05g026900 [Sorghum bicolor]
isotig00907	isogroup00038	1531	ref|XP_002451281.1|	hypothetical protein SORBIDRAFT_05g026900 [Sorghum bicolor] gb|EES10269.1| hypothetical protein SORBIDRAFT_05g026900 [Sorghum bicolor]
isotig00908	isogroup00038	1464	gb|AFW60130.1|	hypothetical protein ZEAMMB73_150740 [Zea mays]
isotig00909	isogroup00038	1452	gb|AFW60130.1|	hypothetical protein ZEAMMB73_150740 [Zea mays]
isotig00910	isogroup00038	1257	ref|XP_002451281.1|	hypothetical protein SORBIDRAFT_05g026900 [Sorghum bicolor] gb|EES10269.1| hypothetical protein SORBIDRAFT_05g026900 [Sorghum bicolor]
isotig00911	isogroup00038	1233	ref|XP_002451281.1|	hypothetical protein SORBIDRAFT_05g026900 [Sorghum bicolor] gb|EES10269.1| hypothetical protein SORBIDRAFT_05g026900 [Sorghum bicolor]
isotig00912	isogroup00038	1169	ref|XP_002451281.1|	hypothetical protein SORBIDRAFT_05g026900 [Sorghum bicolor] gb|EES10269.1| hypothetical protein SORBIDRAFT_05g026900 [Sorghum bicolor]
isotig00913	isogroup00038	718	ref|XP_002451282.1|	hypothetical protein SORBIDRAFT_05g026910 [Sorghum bicolor] gb|EES10270.1| hypothetical protein SORBIDRAFT_05g026910 [Sorghum bicolor]
isotig00914	isogroup00039	3452	tpg|DAA49708.1|	TPA: eukaryotic translation initiation factor 4E-2 [Zea mays]
isotig00915	isogroup00039	3452	tpg|DAA49708.1|	TPA: eukaryotic translation initiation factor 4E-2 [Zea mays]
isotig00916	isogroup00039	3451	tpg|DAA49708.1|	TPA: eukaryotic translation initiation factor 4E-2 [Zea mays]
isotig00917	isogroup00039	3453	tpg|DAA49708.1|	TPA: eukaryotic translation initiation factor 4E-2 [Zea mays]
isotig00918	isogroup00039	3413	tpg|DAA49708.1|	TPA: eukaryotic translation initiation factor 4E-2 [Zea mays]
isotig00919	isogroup00039	3452	ref|NP_001064811.1|	Os10g0467800 [Oryza sativa Japonica Group] sp|Q9AV71.1|CESA7_ORYSJ RecName: Full=Cellulose synthase A catalytic subunit 7 [UDP-forming]; AltName: Full=OsCesA7 gb|AAK27814.1|AC022457_17 putative cellulose synthase [Oryza sativa Japonica Group] gb|AAP54202.1| Cellulose synthase A catalytic subunit 4, putative, expressed [Oryza sativa Japonica Group] dbj|BAF26725.1| Os10g0467800 [Oryza sativa Japoni…
isotig00920	isogroup00039	3452	ref|NP_001064811.1|	Os10g0467800 [Oryza sativa Japonica Group] sp|Q9AV71.1|CESA7_ORYSJ RecName: Full=Cellulose synthase A catalytic subunit 7 [UDP-forming]; AltName: Full=OsCesA7 gb|AAK27814.1|AC022457_17 putative cellulose synthase [Oryza sativa Japonica Group] gb|AAP54202.1| Cellulose synthase A catalytic subunit 4, putative, expressed [Oryza sativa Japonica Group] dbj|BAF26725.1| Os10g0467800 [Oryza sativa Japoni…
isotig00921	isogroup00039	3452	ref|NP_001064811.1|	Os10g0467800 [Oryza sativa Japonica Group] sp|Q9AV71.1|CESA7_ORYSJ RecName: Full=Cellulose synthase A catalytic subunit 7 [UDP-forming]; AltName: Full=OsCesA7 gb|AAK27814.1|AC022457_17 putative cellulose synthase [Oryza sativa Japonica Group] gb|AAP54202.1| Cellulose synthase A catalytic subunit 4, putative, expressed [Oryza sativa Japonica Group] dbj|BAF26725.1| Os10g0467800 [Oryza sativa Japoni…
isotig00922	isogroup00039	3413	tpg|DAA49708.1|	TPA: eukaryotic translation initiation factor 4E-2 [Zea mays]
isotig00923	isogroup00039	3452	ref|NP_001064811.1|	Os10g0467800 [Oryza sativa Japonica Group] sp|Q9AV71.1|CESA7_ORYSJ RecName: Full=Cellulose synthase A catalytic subunit 7 [UDP-forming]; AltName: Full=OsCesA7 gb|AAK27814.1|AC022457_17 putative cellulose synthase [Oryza sativa Japonica Group] gb|AAP54202.1| Cellulose synthase A catalytic subunit 4, putative, expressed [Oryza sativa Japonica Group] dbj|BAF26725.1| Os10g0467800 [Oryza sativa Japoni…
isotig00924	isogroup00039	3452	tpg|DAA49708.1|	TPA: eukaryotic translation initiation factor 4E-2 [Zea mays]
isotig00925	isogroup00039	3412	tpg|DAA49708.1|	TPA: eukaryotic translation initiation factor 4E-2 [Zea mays]
isotig00926	isogroup00039	3414	tpg|DAA49708.1|	TPA: eukaryotic translation initiation factor 4E-2 [Zea mays]
isotig00927	isogroup00039	3413	ref|NP_001064811.1|	Os10g0467800 [Oryza sativa Japonica Group] sp|Q9AV71.1|CESA7_ORYSJ RecName: Full=Cellulose synthase A catalytic subunit 7 [UDP-forming]; AltName: Full=OsCesA7 gb|AAK27814.1|AC022457_17 putative cellulose synthase [Oryza sativa Japonica Group] gb|AAP54202.1| Cellulose synthase A catalytic subunit 4, putative, expressed [Oryza sativa Japonica Group] dbj|BAF26725.1| Os10g0467800 [Oryza sativa Japoni…
isotig00928	isogroup00039	3413	ref|NP_001064811.1|	Os10g0467800 [Oryza sativa Japonica Group] sp|Q9AV71.1|CESA7_ORYSJ RecName: Full=Cellulose synthase A catalytic subunit 7 [UDP-forming]; AltName: Full=OsCesA7 gb|AAK27814.1|AC022457_17 putative cellulose synthase [Oryza sativa Japonica Group] gb|AAP54202.1| Cellulose synthase A catalytic subunit 4, putative, expressed [Oryza sativa Japonica Group] dbj|BAF26725.1| Os10g0467800 [Oryza sativa Japoni…
isotig00929	isogroup00039	3413	ref|NP_001064811.1|	Os10g0467800 [Oryza sativa Japonica Group] sp|Q9AV71.1|CESA7_ORYSJ RecName: Full=Cellulose synthase A catalytic subunit 7 [UDP-forming]; AltName: Full=OsCesA7 gb|AAK27814.1|AC022457_17 putative cellulose synthase [Oryza sativa Japonica Group] gb|AAP54202.1| Cellulose synthase A catalytic subunit 4, putative, expressed [Oryza sativa Japonica Group] dbj|BAF26725.1| Os10g0467800 [Oryza sativa Japoni…
isotig00930	isogroup00039	3413	ref|NP_001064811.1|	Os10g0467800 [Oryza sativa Japonica Group] sp|Q9AV71.1|CESA7_ORYSJ RecName: Full=Cellulose synthase A catalytic subunit 7 [UDP-forming]; AltName: Full=OsCesA7 gb|AAK27814.1|AC022457_17 putative cellulose synthase [Oryza sativa Japonica Group] gb|AAP54202.1| Cellulose synthase A catalytic subunit 4, putative, expressed [Oryza sativa Japonica Group] dbj|BAF26725.1| Os10g0467800 [Oryza sativa Japoni…
isotig00931	isogroup00039	3413	tpg|DAA49708.1|	TPA: eukaryotic translation initiation factor 4E-2 [Zea mays]
isotig00932	isogroup00039	2450	tpg|DAA49708.1|	TPA: eukaryotic translation initiation factor 4E-2 [Zea mays]
isotig00933	isogroup00039	2449	tpg|DAA49708.1|	TPA: eukaryotic translation initiation factor 4E-2 [Zea mays]
isotig00934	isogroup00039	2411	tpg|DAA49708.1|	TPA: eukaryotic translation initiation factor 4E-2 [Zea mays]
isotig00935	isogroup00039	2410	tpg|DAA49708.1|	TPA: eukaryotic translation initiation factor 4E-2 [Zea mays]
isotig00936	isogroup00039	1884	gb|AAR29966.1|	putative cellulose synthase catalytic subunit [Hordeum vulgare]
isotig00937	isogroup00039	1845	gb|AAR29966.1|	putative cellulose synthase catalytic subunit [Hordeum vulgare]
isotig00938	isogroup00040	2764
isotig00939	isogroup00040	2728
isotig00940	isogroup00040	2551
isotig00941	isogroup00040	2515
isotig00942	isogroup00040	1956
isotig00943	isogroup00040	1920
isotig00944	isogroup00040	1743
isotig00945	isogroup00040	1707
isotig00946	isogroup00040	1612
isotig00947	isogroup00040	1449
isotig00948	isogroup00040	1423
isotig00949	isogroup00040	1389
isotig00950	isogroup00040	1279
isotig00951	isogroup00040	1260
isotig00952	isogroup00040	1203
isotig00953	isogroup00040	1014
isotig00954	isogroup00040	1014
isotig00955	isogroup00040	840
isotig00956	isogroup00040	825
isotig00957	isogroup00040	745
isotig00958	isogroup00040	677
isotig00959	isogroup00041	3090	gb|ACN33692.1|	unknown [Zea mays] gb|AFW71860.1| hypothetical protein ZEAMMB73_223210 [Zea mays] gb|AFW71861.1| hypothetical protein ZEAMMB73_223210 [Zea mays] gb|AFW71862.1| hypothetical protein ZEAMMB73_223210 [Zea mays] gb|AFW71863.1| hypothetical protein ZEAMMB73_223210 [Zea mays] gb|AFW71864.1| hypothetical protein ZEAMMB73_223210 [Zea mays]
isotig00960	isogroup00041	3063	gb|ACN33692.1|	unknown [Zea mays] gb|AFW71860.1| hypothetical protein ZEAMMB73_223210 [Zea mays] gb|AFW71861.1| hypothetical protein ZEAMMB73_223210 [Zea mays] gb|AFW71862.1| hypothetical protein ZEAMMB73_223210 [Zea mays] gb|AFW71863.1| hypothetical protein ZEAMMB73_223210 [Zea mays] gb|AFW71864.1| hypothetical protein ZEAMMB73_223210 [Zea mays]
isotig00961	isogroup00041	2676	gb|AFW70717.1|	putative subtilase family protein [Zea mays]
isotig00962	isogroup00041	2676	gb|AFW70717.1|	putative subtilase family protein [Zea mays]
isotig00963	isogroup00041	2675	gb|AFW70717.1|	putative subtilase family protein [Zea mays]
isotig00964	isogroup00041	2649	gb|AFW70717.1|	putative subtilase family protein [Zea mays]
isotig00965	isogroup00041	2675	gb|AFW70717.1|	putative subtilase family protein [Zea mays]
isotig00966	isogroup00041	2649	gb|AFW70717.1|	putative subtilase family protein [Zea mays]
isotig00967	isogroup00041	2678	gb|AFW70717.1|	putative subtilase family protein [Zea mays]
isotig00968	isogroup00041	2676	gb|AFW70717.1|	putative subtilase family protein [Zea mays]
isotig00969	isogroup00041	2648	gb|AFW70717.1|	putative subtilase family protein [Zea mays]
isotig00970	isogroup00041	2676	gb|AFW70717.1|	putative subtilase family protein [Zea mays]
isotig00971	isogroup00041	2648	gb|AFW70717.1|	putative subtilase family protein [Zea mays]
isotig00972	isogroup00041	2675	gb|AFW70717.1|	putative subtilase family protein [Zea mays]
isotig00973	isogroup00041	2651	gb|AFW70717.1|	putative subtilase family protein [Zea mays]
isotig00974	isogroup00041	2649	gb|AFW70717.1|	putative subtilase family protein [Zea mays]
isotig00975	isogroup00041	2675	gb|AFW70717.1|	putative subtilase family protein [Zea mays]
isotig00976	isogroup00041	2649	gb|AFW70717.1|	putative subtilase family protein [Zea mays]
isotig00977	isogroup00041	2678	gb|AFW70717.1|	putative subtilase family protein [Zea mays]
isotig00978	isogroup00041	2595	gb|AFW70717.1|	putative subtilase family protein [Zea mays]
isotig00979	isogroup00041	2648	gb|AFW70717.1|	putative subtilase family protein [Zea mays]
isotig00980	isogroup00041	2595	gb|AFW70717.1|	putative subtilase family protein [Zea mays]
isotig00981	isogroup00041	2648	gb|AFW70717.1|	putative subtilase family protein [Zea mays]
isotig00982	isogroup00041	2595	gb|AFW70717.1|	putative subtilase family protein [Zea mays]
isotig00983	isogroup00041	2651	gb|AFW70717.1|	putative subtilase family protein [Zea mays]
isotig00984	isogroup00041	2568	gb|AFW70717.1|	putative subtilase family protein [Zea mays]
isotig00985	isogroup00041	2595	gb|AFW70717.1|	putative subtilase family protein [Zea mays]
isotig00986	isogroup00041	2574	gb|AFW70717.1|	putative subtilase family protein [Zea mays]
isotig00987	isogroup00041	2568	gb|AFW70717.1|	putative subtilase family protein [Zea mays]
isotig00988	isogroup00041	2598	gb|AFW70717.1|	putative subtilase family protein [Zea mays]
isotig00989	isogroup00041	2595	gb|AFW70717.1|	putative subtilase family protein [Zea mays]
isotig00990	isogroup00041	2574	gb|AFW70717.1|	putative subtilase family protein [Zea mays]
isotig00991	isogroup00041	2567	gb|AFW70717.1|	putative subtilase family protein [Zea mays]
isotig00992	isogroup00041	2595	gb|AFW70717.1|	putative subtilase family protein [Zea mays]
isotig00993	isogroup00041	2574	gb|AFW70717.1|	putative subtilase family protein [Zea mays]
isotig00994	isogroup00041	2567	gb|AFW70717.1|	putative subtilase family protein [Zea mays]
isotig00995	isogroup00041	2595	gb|AFW70717.1|	putative subtilase family protein [Zea mays]
isotig00996	isogroup00041	2547	gb|AFW70717.1|	putative subtilase family protein [Zea mays]
isotig00997	isogroup00041	2570	gb|AFW70717.1|	putative subtilase family protein [Zea mays]
isotig00998	isogroup00041	2568	gb|AFW70717.1|	putative subtilase family protein [Zea mays]
isotig00999	isogroup00041	2574	gb|AFW70717.1|	putative subtilase family protein [Zea mays]
isotig01000	isogroup00041	2595	gb|AFW70717.1|	putative subtilase family protein [Zea mays]
isotig01001	isogroup00041	2547	gb|AFW70717.1|	putative subtilase family protein [Zea mays]
isotig01002	isogroup00041	2577	gb|AFW70717.1|	putative subtilase family protein [Zea mays]
isotig01003	isogroup00041	2574	gb|AFW70717.1|	putative subtilase family protein [Zea mays]
isotig01004	isogroup00041	2568	gb|AFW70717.1|	putative subtilase family protein [Zea mays]
isotig01005	isogroup00041	2598	gb|AFW70717.1|	putative subtilase family protein [Zea mays]
isotig01006	isogroup00041	2546	gb|AFW70717.1|	putative subtilase family protein [Zea mays]
isotig01007	isogroup00041	2574	gb|AFW70717.1|	putative subtilase family protein [Zea mays]
isotig01008	isogroup00041	2567	gb|AFW70717.1|	putative subtilase family protein [Zea mays]
isotig01009	isogroup00041	2546	gb|AFW70717.1|	putative subtilase family protein [Zea mays]
isotig01010	isogroup00041	2574	gb|AFW70717.1|	putative subtilase family protein [Zea mays]
isotig01011	isogroup00041	2567	gb|AFW70717.1|	putative subtilase family protein [Zea mays]
isotig01012	isogroup00041	2549	gb|AFW70717.1|	putative subtilase family protein [Zea mays]
isotig01013	isogroup00041	2547	gb|AFW70717.1|	putative subtilase family protein [Zea mays]
isotig01014	isogroup00041	2570	gb|AFW70717.1|	putative subtilase family protein [Zea mays]
isotig01015	isogroup00041	2574	gb|AFW70717.1|	putative subtilase family protein [Zea mays]
isotig01016	isogroup00041	2547	gb|AFW70717.1|	putative subtilase family protein [Zea mays]
isotig01017	isogroup00041	2577	gb|AFW70717.1|	putative subtilase family protein [Zea mays]
isotig01018	isogroup00041	2546	gb|AFW70717.1|	putative subtilase family protein [Zea mays]
isotig01019	isogroup00041	2546	gb|AFW70717.1|	putative subtilase family protein [Zea mays]
isotig01020	isogroup00041	2549	gb|AFW70717.1|	putative subtilase family protein [Zea mays]
isotig01021	isogroup00041	2537	gb|AFW70717.1|	putative subtilase family protein [Zea mays]
isotig01022	isogroup00041	2537	gb|AFW70717.1|	putative subtilase family protein [Zea mays]
isotig01023	isogroup00041	2442	gb|AFW70717.1|	putative subtilase family protein [Zea mays]
isotig01024	isogroup00041	2442	gb|AFW70717.1|	putative subtilase family protein [Zea mays]
isotig01025	isogroup00042	5425	sp|Q0IQN5.2|RTOR1_ORYSJ	RecName: Full=Regulatory-associated protein of TOR 1; AltName: Full=Protein RAPTOR 1; Short=OsRAPTOR1 gb|ABG21850.1| transducin family protein, putative, expressed [Oryza sativa Japonica Group]
isotig01026	isogroup00042	5417	sp|Q0IQN5.2|RTOR1_ORYSJ	RecName: Full=Regulatory-associated protein of TOR 1; AltName: Full=Protein RAPTOR 1; Short=OsRAPTOR1 gb|ABG21850.1| transducin family protein, putative, expressed [Oryza sativa Japonica Group]
isotig01027	isogroup00042	5426	sp|Q0IQN5.2|RTOR1_ORYSJ	RecName: Full=Regulatory-associated protein of TOR 1; AltName: Full=Protein RAPTOR 1; Short=OsRAPTOR1 gb|ABG21850.1| transducin family protein, putative, expressed [Oryza sativa Japonica Group]
isotig01028	isogroup00042	5428	sp|Q0IQN5.2|RTOR1_ORYSJ	RecName: Full=Regulatory-associated protein of TOR 1; AltName: Full=Protein RAPTOR 1; Short=OsRAPTOR1 gb|ABG21850.1| transducin family protein, putative, expressed [Oryza sativa Japonica Group]
isotig01029	isogroup00042	5420	sp|Q0IQN5.2|RTOR1_ORYSJ	RecName: Full=Regulatory-associated protein of TOR 1; AltName: Full=Protein RAPTOR 1; Short=OsRAPTOR1 gb|ABG21850.1| transducin family protein, putative, expressed [Oryza sativa Japonica Group]
isotig01030	isogroup00042	5407	sp|Q0IQN5.2|RTOR1_ORYSJ	RecName: Full=Regulatory-associated protein of TOR 1; AltName: Full=Protein RAPTOR 1; Short=OsRAPTOR1 gb|ABG21850.1| transducin family protein, putative, expressed [Oryza sativa Japonica Group]
isotig01031	isogroup00042	5418	sp|Q0IQN5.2|RTOR1_ORYSJ	RecName: Full=Regulatory-associated protein of TOR 1; AltName: Full=Protein RAPTOR 1; Short=OsRAPTOR1 gb|ABG21850.1| transducin family protein, putative, expressed [Oryza sativa Japonica Group]
isotig01032	isogroup00042	5429	sp|Q0IQN5.2|RTOR1_ORYSJ	RecName: Full=Regulatory-associated protein of TOR 1; AltName: Full=Protein RAPTOR 1; Short=OsRAPTOR1 gb|ABG21850.1| transducin family protein, putative, expressed [Oryza sativa Japonica Group]
isotig01033	isogroup00042	5399	sp|Q0IQN5.2|RTOR1_ORYSJ	RecName: Full=Regulatory-associated protein of TOR 1; AltName: Full=Protein RAPTOR 1; Short=OsRAPTOR1 gb|ABG21850.1| transducin family protein, putative, expressed [Oryza sativa Japonica Group]
isotig01034	isogroup00042	5420	sp|Q0IQN5.2|RTOR1_ORYSJ	RecName: Full=Regulatory-associated protein of TOR 1; AltName: Full=Protein RAPTOR 1; Short=OsRAPTOR1 gb|ABG21850.1| transducin family protein, putative, expressed [Oryza sativa Japonica Group]
isotig01035	isogroup00042	5408	sp|Q0IQN5.2|RTOR1_ORYSJ	RecName: Full=Regulatory-associated protein of TOR 1; AltName: Full=Protein RAPTOR 1; Short=OsRAPTOR1 gb|ABG21850.1| transducin family protein, putative, expressed [Oryza sativa Japonica Group]
isotig01036	isogroup00042	5410	sp|Q0IQN5.2|RTOR1_ORYSJ	RecName: Full=Regulatory-associated protein of TOR 1; AltName: Full=Protein RAPTOR 1; Short=OsRAPTOR1 gb|ABG21850.1| transducin family protein, putative, expressed [Oryza sativa Japonica Group]
isotig01037	isogroup00042	5402	sp|Q0IQN5.2|RTOR1_ORYSJ	RecName: Full=Regulatory-associated protein of TOR 1; AltName: Full=Protein RAPTOR 1; Short=OsRAPTOR1 gb|ABG21850.1| transducin family protein, putative, expressed [Oryza sativa Japonica Group]
isotig01038	isogroup00042	5400	sp|Q0IQN5.2|RTOR1_ORYSJ	RecName: Full=Regulatory-associated protein of TOR 1; AltName: Full=Protein RAPTOR 1; Short=OsRAPTOR1 gb|ABG21850.1| transducin family protein, putative, expressed [Oryza sativa Japonica Group]
isotig01039	isogroup00042	5411	sp|Q0IQN5.2|RTOR1_ORYSJ	RecName: Full=Regulatory-associated protein of TOR 1; AltName: Full=Protein RAPTOR 1; Short=OsRAPTOR1 gb|ABG21850.1| transducin family protein, putative, expressed [Oryza sativa Japonica Group]
isotig01040	isogroup00042	5402	sp|Q0IQN5.2|RTOR1_ORYSJ	RecName: Full=Regulatory-associated protein of TOR 1; AltName: Full=Protein RAPTOR 1; Short=OsRAPTOR1 gb|ABG21850.1| transducin family protein, putative, expressed [Oryza sativa Japonica Group]
isotig01041	isogroup00042	5367	sp|Q0IQN5.2|RTOR1_ORYSJ	RecName: Full=Regulatory-associated protein of TOR 1; AltName: Full=Protein RAPTOR 1; Short=OsRAPTOR1 gb|ABG21850.1| transducin family protein, putative, expressed [Oryza sativa Japonica Group]
isotig01042	isogroup00042	5367	sp|Q0IQN5.2|RTOR1_ORYSJ	RecName: Full=Regulatory-associated protein of TOR 1; AltName: Full=Protein RAPTOR 1; Short=OsRAPTOR1 gb|ABG21850.1| transducin family protein, putative, expressed [Oryza sativa Japonica Group]
isotig01043	isogroup00042	5359	sp|Q0IQN5.2|RTOR1_ORYSJ	RecName: Full=Regulatory-associated protein of TOR 1; AltName: Full=Protein RAPTOR 1; Short=OsRAPTOR1 gb|ABG21850.1| transducin family protein, putative, expressed [Oryza sativa Japonica Group]
isotig01044	isogroup00042	5368	sp|Q0IQN5.2|RTOR1_ORYSJ	RecName: Full=Regulatory-associated protein of TOR 1; AltName: Full=Protein RAPTOR 1; Short=OsRAPTOR1 gb|ABG21850.1| transducin family protein, putative, expressed [Oryza sativa Japonica Group]
isotig01045	isogroup00042	5370	sp|Q0IQN5.2|RTOR1_ORYSJ	RecName: Full=Regulatory-associated protein of TOR 1; AltName: Full=Protein RAPTOR 1; Short=OsRAPTOR1 gb|ABG21850.1| transducin family protein, putative, expressed [Oryza sativa Japonica Group]
isotig01046	isogroup00042	5359	sp|Q0IQN5.2|RTOR1_ORYSJ	RecName: Full=Regulatory-associated protein of TOR 1; AltName: Full=Protein RAPTOR 1; Short=OsRAPTOR1 gb|ABG21850.1| transducin family protein, putative, expressed [Oryza sativa Japonica Group]
isotig01047	isogroup00042	5368	sp|Q0IQN5.2|RTOR1_ORYSJ	RecName: Full=Regulatory-associated protein of TOR 1; AltName: Full=Protein RAPTOR 1; Short=OsRAPTOR1 gb|ABG21850.1| transducin family protein, putative, expressed [Oryza sativa Japonica Group]
isotig01048	isogroup00042	5370	sp|Q0IQN5.2|RTOR1_ORYSJ	RecName: Full=Regulatory-associated protein of TOR 1; AltName: Full=Protein RAPTOR 1; Short=OsRAPTOR1 gb|ABG21850.1| transducin family protein, putative, expressed [Oryza sativa Japonica Group]
isotig01049	isogroup00042	5362	sp|Q0IQN5.2|RTOR1_ORYSJ	RecName: Full=Regulatory-associated protein of TOR 1; AltName: Full=Protein RAPTOR 1; Short=OsRAPTOR1 gb|ABG21850.1| transducin family protein, putative, expressed [Oryza sativa Japonica Group]
isotig01050	isogroup00042	5349	sp|Q0IQN5.2|RTOR1_ORYSJ	RecName: Full=Regulatory-associated protein of TOR 1; AltName: Full=Protein RAPTOR 1; Short=OsRAPTOR1 gb|ABG21850.1| transducin family protein, putative, expressed [Oryza sativa Japonica Group]
isotig01051	isogroup00042	5360	sp|Q0IQN5.2|RTOR1_ORYSJ	RecName: Full=Regulatory-associated protein of TOR 1; AltName: Full=Protein RAPTOR 1; Short=OsRAPTOR1 gb|ABG21850.1| transducin family protein, putative, expressed [Oryza sativa Japonica Group]
isotig01052	isogroup00042	5362	sp|Q0IQN5.2|RTOR1_ORYSJ	RecName: Full=Regulatory-associated protein of TOR 1; AltName: Full=Protein RAPTOR 1; Short=OsRAPTOR1 gb|ABG21850.1| transducin family protein, putative, expressed [Oryza sativa Japonica Group]
isotig01053	isogroup00042	5349	sp|Q0IQN5.2|RTOR1_ORYSJ	RecName: Full=Regulatory-associated protein of TOR 1; AltName: Full=Protein RAPTOR 1; Short=OsRAPTOR1 gb|ABG21850.1| transducin family protein, putative, expressed [Oryza sativa Japonica Group]
isotig01054	isogroup00042	5371	sp|Q0IQN5.2|RTOR1_ORYSJ	RecName: Full=Regulatory-associated protein of TOR 1; AltName: Full=Protein RAPTOR 1; Short=OsRAPTOR1 gb|ABG21850.1| transducin family protein, putative, expressed [Oryza sativa Japonica Group]
isotig01055	isogroup00042	5360	sp|Q0IQN5.2|RTOR1_ORYSJ	RecName: Full=Regulatory-associated protein of TOR 1; AltName: Full=Protein RAPTOR 1; Short=OsRAPTOR1 gb|ABG21850.1| transducin family protein, putative, expressed [Oryza sativa Japonica Group]
isotig01056	isogroup00042	5341	sp|Q0IQN5.2|RTOR1_ORYSJ	RecName: Full=Regulatory-associated protein of TOR 1; AltName: Full=Protein RAPTOR 1; Short=OsRAPTOR1 gb|ABG21850.1| transducin family protein, putative, expressed [Oryza sativa Japonica Group]
isotig01057	isogroup00042	5371	sp|Q0IQN5.2|RTOR1_ORYSJ	RecName: Full=Regulatory-associated protein of TOR 1; AltName: Full=Protein RAPTOR 1; Short=OsRAPTOR1 gb|ABG21850.1| transducin family protein, putative, expressed [Oryza sativa Japonica Group]
isotig01058	isogroup00042	5362	sp|Q0IQN5.2|RTOR1_ORYSJ	RecName: Full=Regulatory-associated protein of TOR 1; AltName: Full=Protein RAPTOR 1; Short=OsRAPTOR1 gb|ABG21850.1| transducin family protein, putative, expressed [Oryza sativa Japonica Group]
isotig01059	isogroup00042	5350	sp|Q0IQN5.2|RTOR1_ORYSJ	RecName: Full=Regulatory-associated protein of TOR 1; AltName: Full=Protein RAPTOR 1; Short=OsRAPTOR1 gb|ABG21850.1| transducin family protein, putative, expressed [Oryza sativa Japonica Group]
isotig01060	isogroup00042	5352	sp|Q0IQN5.2|RTOR1_ORYSJ	RecName: Full=Regulatory-associated protein of TOR 1; AltName: Full=Protein RAPTOR 1; Short=OsRAPTOR1 gb|ABG21850.1| transducin family protein, putative, expressed [Oryza sativa Japonica Group]
isotig01061	isogroup00042	5341	sp|Q0IQN5.2|RTOR1_ORYSJ	RecName: Full=Regulatory-associated protein of TOR 1; AltName: Full=Protein RAPTOR 1; Short=OsRAPTOR1 gb|ABG21850.1| transducin family protein, putative, expressed [Oryza sativa Japonica Group]
isotig01062	isogroup00042	5362	sp|Q0IQN5.2|RTOR1_ORYSJ	RecName: Full=Regulatory-associated protein of TOR 1; AltName: Full=Protein RAPTOR 1; Short=OsRAPTOR1 gb|ABG21850.1| transducin family protein, putative, expressed [Oryza sativa Japonica Group]
isotig01063	isogroup00042	5350	sp|Q0IQN5.2|RTOR1_ORYSJ	RecName: Full=Regulatory-associated protein of TOR 1; AltName: Full=Protein RAPTOR 1; Short=OsRAPTOR1 gb|ABG21850.1| transducin family protein, putative, expressed [Oryza sativa Japonica Group]
isotig01064	isogroup00042	5352	sp|Q0IQN5.2|RTOR1_ORYSJ	RecName: Full=Regulatory-associated protein of TOR 1; AltName: Full=Protein RAPTOR 1; Short=OsRAPTOR1 gb|ABG21850.1| transducin family protein, putative, expressed [Oryza sativa Japonica Group]
isotig01065	isogroup00042	5344	sp|Q0IQN5.2|RTOR1_ORYSJ	RecName: Full=Regulatory-associated protein of TOR 1; AltName: Full=Protein RAPTOR 1; Short=OsRAPTOR1 gb|ABG21850.1| transducin family protein, putative, expressed [Oryza sativa Japonica Group]
isotig01066	isogroup00042	5342	sp|Q0IQN5.2|RTOR1_ORYSJ	RecName: Full=Regulatory-associated protein of TOR 1; AltName: Full=Protein RAPTOR 1; Short=OsRAPTOR1 gb|ABG21850.1| transducin family protein, putative, expressed [Oryza sativa Japonica Group]
isotig01067	isogroup00042	5344	sp|Q0IQN5.2|RTOR1_ORYSJ	RecName: Full=Regulatory-associated protein of TOR 1; AltName: Full=Protein RAPTOR 1; Short=OsRAPTOR1 gb|ABG21850.1| transducin family protein, putative, expressed [Oryza sativa Japonica Group]
isotig01068	isogroup00042	5353	sp|Q0IQN5.2|RTOR1_ORYSJ	RecName: Full=Regulatory-associated protein of TOR 1; AltName: Full=Protein RAPTOR 1; Short=OsRAPTOR1 gb|ABG21850.1| transducin family protein, putative, expressed [Oryza sativa Japonica Group]
isotig01069	isogroup00042	5342	sp|Q0IQN5.2|RTOR1_ORYSJ	RecName: Full=Regulatory-associated protein of TOR 1; AltName: Full=Protein RAPTOR 1; Short=OsRAPTOR1 gb|ABG21850.1| transducin family protein, putative, expressed [Oryza sativa Japonica Group]
isotig01070	isogroup00042	5353	sp|Q0IQN5.2|RTOR1_ORYSJ	RecName: Full=Regulatory-associated protein of TOR 1; AltName: Full=Protein RAPTOR 1; Short=OsRAPTOR1 gb|ABG21850.1| transducin family protein, putative, expressed [Oryza sativa Japonica Group]
isotig01071	isogroup00042	5344	sp|Q0IQN5.2|RTOR1_ORYSJ	RecName: Full=Regulatory-associated protein of TOR 1; AltName: Full=Protein RAPTOR 1; Short=OsRAPTOR1 gb|ABG21850.1| transducin family protein, putative, expressed [Oryza sativa Japonica Group]
isotig01072	isogroup00042	5344	sp|Q0IQN5.2|RTOR1_ORYSJ	RecName: Full=Regulatory-associated protein of TOR 1; AltName: Full=Protein RAPTOR 1; Short=OsRAPTOR1 gb|ABG21850.1| transducin family protein, putative, expressed [Oryza sativa Japonica Group]
isotig01073	isogroup00042	4548	sp|Q0IQN5.2|RTOR1_ORYSJ	RecName: Full=Regulatory-associated protein of TOR 1; AltName: Full=Protein RAPTOR 1; Short=OsRAPTOR1 gb|ABG21850.1| transducin family protein, putative, expressed [Oryza sativa Japonica Group]
isotig01074	isogroup00042	4549	sp|Q0IQN5.2|RTOR1_ORYSJ	RecName: Full=Regulatory-associated protein of TOR 1; AltName: Full=Protein RAPTOR 1; Short=OsRAPTOR1 gb|ABG21850.1| transducin family protein, putative, expressed [Oryza sativa Japonica Group]
isotig01075	isogroup00042	4530	sp|Q0IQN5.2|RTOR1_ORYSJ	RecName: Full=Regulatory-associated protein of TOR 1; AltName: Full=Protein RAPTOR 1; Short=OsRAPTOR1 gb|ABG21850.1| transducin family protein, putative, expressed [Oryza sativa Japonica Group]
isotig01076	isogroup00042	4531	sp|Q0IQN5.2|RTOR1_ORYSJ	RecName: Full=Regulatory-associated protein of TOR 1; AltName: Full=Protein RAPTOR 1; Short=OsRAPTOR1 gb|ABG21850.1| transducin family protein, putative, expressed [Oryza sativa Japonica Group]
isotig01077	isogroup00042	4490	sp|Q0IQN5.2|RTOR1_ORYSJ	RecName: Full=Regulatory-associated protein of TOR 1; AltName: Full=Protein RAPTOR 1; Short=OsRAPTOR1 gb|ABG21850.1| transducin family protein, putative, expressed [Oryza sativa Japonica Group]
isotig01078	isogroup00042	4490	sp|Q0IQN5.2|RTOR1_ORYSJ	RecName: Full=Regulatory-associated protein of TOR 1; AltName: Full=Protein RAPTOR 1; Short=OsRAPTOR1 gb|ABG21850.1| transducin family protein, putative, expressed [Oryza sativa Japonica Group]
isotig01079	isogroup00042	4491	sp|Q0IQN5.2|RTOR1_ORYSJ	RecName: Full=Regulatory-associated protein of TOR 1; AltName: Full=Protein RAPTOR 1; Short=OsRAPTOR1 gb|ABG21850.1| transducin family protein, putative, expressed [Oryza sativa Japonica Group]
isotig01080	isogroup00042	4491	sp|Q0IQN5.2|RTOR1_ORYSJ	RecName: Full=Regulatory-associated protein of TOR 1; AltName: Full=Protein RAPTOR 1; Short=OsRAPTOR1 gb|ABG21850.1| transducin family protein, putative, expressed [Oryza sativa Japonica Group]
isotig01081	isogroup00042	4472	sp|Q0IQN5.2|RTOR1_ORYSJ	RecName: Full=Regulatory-associated protein of TOR 1; AltName: Full=Protein RAPTOR 1; Short=OsRAPTOR1 gb|ABG21850.1| transducin family protein, putative, expressed [Oryza sativa Japonica Group]
isotig01082	isogroup00042	4472	sp|Q0IQN5.2|RTOR1_ORYSJ	RecName: Full=Regulatory-associated protein of TOR 1; AltName: Full=Protein RAPTOR 1; Short=OsRAPTOR1 gb|ABG21850.1| transducin family protein, putative, expressed [Oryza sativa Japonica Group]
isotig01083	isogroup00042	4473	sp|Q0IQN5.2|RTOR1_ORYSJ	RecName: Full=Regulatory-associated protein of TOR 1; AltName: Full=Protein RAPTOR 1; Short=OsRAPTOR1 gb|ABG21850.1| transducin family protein, putative, expressed [Oryza sativa Japonica Group]
isotig01084	isogroup00042	4473	sp|Q0IQN5.2|RTOR1_ORYSJ	RecName: Full=Regulatory-associated protein of TOR 1; AltName: Full=Protein RAPTOR 1; Short=OsRAPTOR1 gb|ABG21850.1| transducin family protein, putative, expressed [Oryza sativa Japonica Group]
isotig01085	isogroup00042	1140
isotig01086	isogroup00043	3464	ref|XP_002442915.1|	hypothetical protein SORBIDRAFT_08g004870 [Sorghum bicolor] gb|EES16753.1| hypothetical protein SORBIDRAFT_08g004870 [Sorghum bicolor]
isotig01087	isogroup00043	3465	ref|XP_002442915.1|	hypothetical protein SORBIDRAFT_08g004870 [Sorghum bicolor] gb|EES16753.1| hypothetical protein SORBIDRAFT_08g004870 [Sorghum bicolor]
isotig01088	isogroup00043	3459	ref|XP_002442915.1|	hypothetical protein SORBIDRAFT_08g004870 [Sorghum bicolor] gb|EES16753.1| hypothetical protein SORBIDRAFT_08g004870 [Sorghum bicolor]
isotig01089	isogroup00043	3461	ref|XP_002442915.1|	hypothetical protein SORBIDRAFT_08g004870 [Sorghum bicolor] gb|EES16753.1| hypothetical protein SORBIDRAFT_08g004870 [Sorghum bicolor]
isotig01090	isogroup00043	3460	ref|XP_002442915.1|	hypothetical protein SORBIDRAFT_08g004870 [Sorghum bicolor] gb|EES16753.1| hypothetical protein SORBIDRAFT_08g004870 [Sorghum bicolor]
isotig01091	isogroup00043	3462	ref|XP_002442915.1|	hypothetical protein SORBIDRAFT_08g004870 [Sorghum bicolor] gb|EES16753.1| hypothetical protein SORBIDRAFT_08g004870 [Sorghum bicolor]
isotig01092	isogroup00043	3461	tpg|DAA55524.1|	TPA: hypothetical protein ZEAMMB73_127310 [Zea mays]
isotig01093	isogroup00043	3463	ref|XP_002442915.1|	hypothetical protein SORBIDRAFT_08g004870 [Sorghum bicolor] gb|EES16753.1| hypothetical protein SORBIDRAFT_08g004870 [Sorghum bicolor]
isotig01094	isogroup00043	3456	ref|XP_002442915.1|	hypothetical protein SORBIDRAFT_08g004870 [Sorghum bicolor] gb|EES16753.1| hypothetical protein SORBIDRAFT_08g004870 [Sorghum bicolor]
isotig01095	isogroup00043	3457	ref|XP_002442915.1|	hypothetical protein SORBIDRAFT_08g004870 [Sorghum bicolor] gb|EES16753.1| hypothetical protein SORBIDRAFT_08g004870 [Sorghum bicolor]
isotig01096	isogroup00043	3459	ref|XP_002442915.1|	hypothetical protein SORBIDRAFT_08g004870 [Sorghum bicolor] gb|EES16753.1| hypothetical protein SORBIDRAFT_08g004870 [Sorghum bicolor]
isotig01097	isogroup00043	3460	ref|XP_002442915.1|	hypothetical protein SORBIDRAFT_08g004870 [Sorghum bicolor] gb|EES16753.1| hypothetical protein SORBIDRAFT_08g004870 [Sorghum bicolor]
isotig01098	isogroup00043	3425	ref|XP_002442915.1|	hypothetical protein SORBIDRAFT_08g004870 [Sorghum bicolor] gb|EES16753.1| hypothetical protein SORBIDRAFT_08g004870 [Sorghum bicolor]
isotig01099	isogroup00043	3435	ref|XP_002442915.1|	hypothetical protein SORBIDRAFT_08g004870 [Sorghum bicolor] gb|EES16753.1| hypothetical protein SORBIDRAFT_08g004870 [Sorghum bicolor]
isotig01100	isogroup00043	3443	ref|XP_002442915.1|	hypothetical protein SORBIDRAFT_08g004870 [Sorghum bicolor] gb|EES16753.1| hypothetical protein SORBIDRAFT_08g004870 [Sorghum bicolor]
isotig01101	isogroup00043	3425	ref|XP_002442915.1|	hypothetical protein SORBIDRAFT_08g004870 [Sorghum bicolor] gb|EES16753.1| hypothetical protein SORBIDRAFT_08g004870 [Sorghum bicolor]
isotig01102	isogroup00043	3420	ref|XP_002442915.1|	hypothetical protein SORBIDRAFT_08g004870 [Sorghum bicolor] gb|EES16753.1| hypothetical protein SORBIDRAFT_08g004870 [Sorghum bicolor]
isotig01103	isogroup00043	3432	ref|XP_002442915.1|	hypothetical protein SORBIDRAFT_08g004870 [Sorghum bicolor] gb|EES16753.1| hypothetical protein SORBIDRAFT_08g004870 [Sorghum bicolor]
isotig01104	isogroup00043	3421	ref|XP_002442915.1|	hypothetical protein SORBIDRAFT_08g004870 [Sorghum bicolor] gb|EES16753.1| hypothetical protein SORBIDRAFT_08g004870 [Sorghum bicolor]
isotig01105	isogroup00043	3441	ref|XP_002442915.1|	hypothetical protein SORBIDRAFT_08g004870 [Sorghum bicolor] gb|EES16753.1| hypothetical protein SORBIDRAFT_08g004870 [Sorghum bicolor]
isotig01106	isogroup00043	3423	ref|XP_002442915.1|	hypothetical protein SORBIDRAFT_08g004870 [Sorghum bicolor] gb|EES16753.1| hypothetical protein SORBIDRAFT_08g004870 [Sorghum bicolor]
isotig01107	isogroup00043	3424	ref|XP_002442915.1|	hypothetical protein SORBIDRAFT_08g004870 [Sorghum bicolor] gb|EES16753.1| hypothetical protein SORBIDRAFT_08g004870 [Sorghum bicolor]
isotig01108	isogroup00043	3396	ref|XP_002442915.1|	hypothetical protein SORBIDRAFT_08g004870 [Sorghum bicolor] gb|EES16753.1| hypothetical protein SORBIDRAFT_08g004870 [Sorghum bicolor]
isotig01109	isogroup00043	3405	ref|XP_002442915.1|	hypothetical protein SORBIDRAFT_08g004870 [Sorghum bicolor] gb|EES16753.1| hypothetical protein SORBIDRAFT_08g004870 [Sorghum bicolor]
isotig01110	isogroup00043	3017	ref|XP_002442915.1|	hypothetical protein SORBIDRAFT_08g004870 [Sorghum bicolor] gb|EES16753.1| hypothetical protein SORBIDRAFT_08g004870 [Sorghum bicolor]
isotig01111	isogroup00043	3017	ref|XP_002442915.1|	hypothetical protein SORBIDRAFT_08g004870 [Sorghum bicolor] gb|EES16753.1| hypothetical protein SORBIDRAFT_08g004870 [Sorghum bicolor]
isotig01112	isogroup00043	3012	ref|XP_002442915.1|	hypothetical protein SORBIDRAFT_08g004870 [Sorghum bicolor] gb|EES16753.1| hypothetical protein SORBIDRAFT_08g004870 [Sorghum bicolor]
isotig01113	isogroup00043	3014	ref|XP_002442915.1|	hypothetical protein SORBIDRAFT_08g004870 [Sorghum bicolor] gb|EES16753.1| hypothetical protein SORBIDRAFT_08g004870 [Sorghum bicolor]
isotig01114	isogroup00043	3013	ref|XP_002442915.1|	hypothetical protein SORBIDRAFT_08g004870 [Sorghum bicolor] gb|EES16753.1| hypothetical protein SORBIDRAFT_08g004870 [Sorghum bicolor]
isotig01115	isogroup00043	3015	ref|XP_002442915.1|	hypothetical protein SORBIDRAFT_08g004870 [Sorghum bicolor] gb|EES16753.1| hypothetical protein SORBIDRAFT_08g004870 [Sorghum bicolor]
isotig01116	isogroup00043	3015	ref|XP_002442915.1|	hypothetical protein SORBIDRAFT_08g004870 [Sorghum bicolor] gb|EES16753.1| hypothetical protein SORBIDRAFT_08g004870 [Sorghum bicolor]
isotig01117	isogroup00043	3016	ref|XP_002442915.1|	hypothetical protein SORBIDRAFT_08g004870 [Sorghum bicolor] gb|EES16753.1| hypothetical protein SORBIDRAFT_08g004870 [Sorghum bicolor]
isotig01118	isogroup00043	3008	ref|XP_002442915.1|	hypothetical protein SORBIDRAFT_08g004870 [Sorghum bicolor] gb|EES16753.1| hypothetical protein SORBIDRAFT_08g004870 [Sorghum bicolor]
isotig01119	isogroup00043	3010	ref|XP_002442915.1|	hypothetical protein SORBIDRAFT_08g004870 [Sorghum bicolor] gb|EES16753.1| hypothetical protein SORBIDRAFT_08g004870 [Sorghum bicolor]
isotig01120	isogroup00043	3011	ref|XP_002442915.1|	hypothetical protein SORBIDRAFT_08g004870 [Sorghum bicolor] gb|EES16753.1| hypothetical protein SORBIDRAFT_08g004870 [Sorghum bicolor]
isotig01121	isogroup00043	3013	ref|XP_002442915.1|	hypothetical protein SORBIDRAFT_08g004870 [Sorghum bicolor] gb|EES16753.1| hypothetical protein SORBIDRAFT_08g004870 [Sorghum bicolor]
isotig01122	isogroup00043	2978	ref|XP_002442915.1|	hypothetical protein SORBIDRAFT_08g004870 [Sorghum bicolor] gb|EES16753.1| hypothetical protein SORBIDRAFT_08g004870 [Sorghum bicolor]
isotig01123	isogroup00043	2988	ref|XP_002442915.1|	hypothetical protein SORBIDRAFT_08g004870 [Sorghum bicolor] gb|EES16753.1| hypothetical protein SORBIDRAFT_08g004870 [Sorghum bicolor]
isotig01124	isogroup00043	2996	ref|XP_002442915.1|	hypothetical protein SORBIDRAFT_08g004870 [Sorghum bicolor] gb|EES16753.1| hypothetical protein SORBIDRAFT_08g004870 [Sorghum bicolor]
isotig01125	isogroup00043	2979	ref|XP_002442915.1|	hypothetical protein SORBIDRAFT_08g004870 [Sorghum bicolor] gb|EES16753.1| hypothetical protein SORBIDRAFT_08g004870 [Sorghum bicolor]
isotig01126	isogroup00043	2972	ref|XP_002442915.1|	hypothetical protein SORBIDRAFT_08g004870 [Sorghum bicolor] gb|EES16753.1| hypothetical protein SORBIDRAFT_08g004870 [Sorghum bicolor]
isotig01127	isogroup00043	2984	ref|XP_002442915.1|	hypothetical protein SORBIDRAFT_08g004870 [Sorghum bicolor] gb|EES16753.1| hypothetical protein SORBIDRAFT_08g004870 [Sorghum bicolor]
isotig01128	isogroup00043	2974	ref|XP_002442915.1|	hypothetical protein SORBIDRAFT_08g004870 [Sorghum bicolor] gb|EES16753.1| hypothetical protein SORBIDRAFT_08g004870 [Sorghum bicolor]
isotig01129	isogroup00043	2993	ref|XP_002442915.1|	hypothetical protein SORBIDRAFT_08g004870 [Sorghum bicolor] gb|EES16753.1| hypothetical protein SORBIDRAFT_08g004870 [Sorghum bicolor]
isotig01130	isogroup00043	2975	ref|XP_002442915.1|	hypothetical protein SORBIDRAFT_08g004870 [Sorghum bicolor] gb|EES16753.1| hypothetical protein SORBIDRAFT_08g004870 [Sorghum bicolor]
isotig01131	isogroup00043	2977	ref|XP_002442915.1|	hypothetical protein SORBIDRAFT_08g004870 [Sorghum bicolor] gb|EES16753.1| hypothetical protein SORBIDRAFT_08g004870 [Sorghum bicolor]
isotig01132	isogroup00043	2948	ref|XP_002442915.1|	hypothetical protein SORBIDRAFT_08g004870 [Sorghum bicolor] gb|EES16753.1| hypothetical protein SORBIDRAFT_08g004870 [Sorghum bicolor]
isotig01133	isogroup00043	2957	ref|XP_002442915.1|	hypothetical protein SORBIDRAFT_08g004870 [Sorghum bicolor] gb|EES16753.1| hypothetical protein SORBIDRAFT_08g004870 [Sorghum bicolor]
isotig01134	isogroup00043	1635	tpg|DAA55524.1|	TPA: hypothetical protein ZEAMMB73_127310 [Zea mays]
isotig01135	isogroup00043	1617	tpg|DAA55524.1|	TPA: hypothetical protein ZEAMMB73_127310 [Zea mays]
isotig01136	isogroup00043	987	gb|EAY82457.1|	hypothetical protein OsI_37674 [Oryza sativa Indica Group]
isotig01137	isogroup00044	1314	ref|XP_002444755.1|	hypothetical protein SORBIDRAFT_07g027340 [Sorghum bicolor] gb|EES14250.1| hypothetical protein SORBIDRAFT_07g027340 [Sorghum bicolor]
isotig01138	isogroup00044	1315	ref|XP_002444755.1|	hypothetical protein SORBIDRAFT_07g027340 [Sorghum bicolor] gb|EES14250.1| hypothetical protein SORBIDRAFT_07g027340 [Sorghum bicolor]
isotig01139	isogroup00044	1316	ref|XP_002444755.1|	hypothetical protein SORBIDRAFT_07g027340 [Sorghum bicolor] gb|EES14250.1| hypothetical protein SORBIDRAFT_07g027340 [Sorghum bicolor]
isotig01140	isogroup00044	1275	ref|XP_002444755.1|	hypothetical protein SORBIDRAFT_07g027340 [Sorghum bicolor] gb|EES14250.1| hypothetical protein SORBIDRAFT_07g027340 [Sorghum bicolor]
isotig01141	isogroup00044	1314	ref|XP_002444755.1|	hypothetical protein SORBIDRAFT_07g027340 [Sorghum bicolor] gb|EES14250.1| hypothetical protein SORBIDRAFT_07g027340 [Sorghum bicolor]
isotig01142	isogroup00044	1276	ref|XP_002444755.1|	hypothetical protein SORBIDRAFT_07g027340 [Sorghum bicolor] gb|EES14250.1| hypothetical protein SORBIDRAFT_07g027340 [Sorghum bicolor]
isotig01143	isogroup00044	1277	ref|XP_002444755.1|	hypothetical protein SORBIDRAFT_07g027340 [Sorghum bicolor] gb|EES14250.1| hypothetical protein SORBIDRAFT_07g027340 [Sorghum bicolor]
isotig01144	isogroup00044	1275	ref|XP_002444755.1|	hypothetical protein SORBIDRAFT_07g027340 [Sorghum bicolor] gb|EES14250.1| hypothetical protein SORBIDRAFT_07g027340 [Sorghum bicolor]
isotig01145	isogroup00044	1314	ref|XP_002444755.1|	hypothetical protein SORBIDRAFT_07g027340 [Sorghum bicolor] gb|EES14250.1| hypothetical protein SORBIDRAFT_07g027340 [Sorghum bicolor]
isotig01146	isogroup00044	1295	ref|XP_002444755.1|	hypothetical protein SORBIDRAFT_07g027340 [Sorghum bicolor] gb|EES14250.1| hypothetical protein SORBIDRAFT_07g027340 [Sorghum bicolor]
isotig01147	isogroup00044	1315	ref|XP_002444755.1|	hypothetical protein SORBIDRAFT_07g027340 [Sorghum bicolor] gb|EES14250.1| hypothetical protein SORBIDRAFT_07g027340 [Sorghum bicolor]
isotig01148	isogroup00044	1295	ref|XP_002444755.1|	hypothetical protein SORBIDRAFT_07g027340 [Sorghum bicolor] gb|EES14250.1| hypothetical protein SORBIDRAFT_07g027340 [Sorghum bicolor]
isotig01149	isogroup00044	1316	ref|XP_002444755.1|	hypothetical protein SORBIDRAFT_07g027340 [Sorghum bicolor] gb|EES14250.1| hypothetical protein SORBIDRAFT_07g027340 [Sorghum bicolor]
isotig01150	isogroup00044	1275	ref|XP_002444755.1|	hypothetical protein SORBIDRAFT_07g027340 [Sorghum bicolor] gb|EES14250.1| hypothetical protein SORBIDRAFT_07g027340 [Sorghum bicolor]
isotig01151	isogroup00044	1314	ref|XP_002444755.1|	hypothetical protein SORBIDRAFT_07g027340 [Sorghum bicolor] gb|EES14250.1| hypothetical protein SORBIDRAFT_07g027340 [Sorghum bicolor]
isotig01152	isogroup00044	1256	ref|XP_002444755.1|	hypothetical protein SORBIDRAFT_07g027340 [Sorghum bicolor] gb|EES14250.1| hypothetical protein SORBIDRAFT_07g027340 [Sorghum bicolor]
isotig01153	isogroup00044	1276	ref|XP_002444755.1|	hypothetical protein SORBIDRAFT_07g027340 [Sorghum bicolor] gb|EES14250.1| hypothetical protein SORBIDRAFT_07g027340 [Sorghum bicolor]
isotig01154	isogroup00044	1256	ref|XP_002444755.1|	hypothetical protein SORBIDRAFT_07g027340 [Sorghum bicolor] gb|EES14250.1| hypothetical protein SORBIDRAFT_07g027340 [Sorghum bicolor]
isotig01155	isogroup00044	1277	ref|XP_002444755.1|	hypothetical protein SORBIDRAFT_07g027340 [Sorghum bicolor] gb|EES14250.1| hypothetical protein SORBIDRAFT_07g027340 [Sorghum bicolor]
isotig01156	isogroup00044	1275	ref|XP_002444755.1|	hypothetical protein SORBIDRAFT_07g027340 [Sorghum bicolor] gb|EES14250.1| hypothetical protein SORBIDRAFT_07g027340 [Sorghum bicolor]
isotig01157	isogroup00044	1314	ref|XP_002444755.1|	hypothetical protein SORBIDRAFT_07g027340 [Sorghum bicolor] gb|EES14250.1| hypothetical protein SORBIDRAFT_07g027340 [Sorghum bicolor]
isotig01158	isogroup00044	1314	ref|XP_002444755.1|	hypothetical protein SORBIDRAFT_07g027340 [Sorghum bicolor] gb|EES14250.1| hypothetical protein SORBIDRAFT_07g027340 [Sorghum bicolor]
isotig01159	isogroup00044	1295	ref|XP_002444755.1|	hypothetical protein SORBIDRAFT_07g027340 [Sorghum bicolor] gb|EES14250.1| hypothetical protein SORBIDRAFT_07g027340 [Sorghum bicolor]
isotig01160	isogroup00044	1295	ref|XP_002444755.1|	hypothetical protein SORBIDRAFT_07g027340 [Sorghum bicolor] gb|EES14250.1| hypothetical protein SORBIDRAFT_07g027340 [Sorghum bicolor]
isotig01161	isogroup00044	1316	ref|XP_002444755.1|	hypothetical protein SORBIDRAFT_07g027340 [Sorghum bicolor] gb|EES14250.1| hypothetical protein SORBIDRAFT_07g027340 [Sorghum bicolor]
isotig01162	isogroup00044	1275	ref|XP_002444755.1|	hypothetical protein SORBIDRAFT_07g027340 [Sorghum bicolor] gb|EES14250.1| hypothetical protein SORBIDRAFT_07g027340 [Sorghum bicolor]
isotig01163	isogroup00044	1314	ref|XP_002444755.1|	hypothetical protein SORBIDRAFT_07g027340 [Sorghum bicolor] gb|EES14250.1| hypothetical protein SORBIDRAFT_07g027340 [Sorghum bicolor]
isotig01164	isogroup00044	1275	ref|XP_002444755.1|	hypothetical protein SORBIDRAFT_07g027340 [Sorghum bicolor] gb|EES14250.1| hypothetical protein SORBIDRAFT_07g027340 [Sorghum bicolor]
isotig01165	isogroup00044	1256	ref|XP_002444755.1|	hypothetical protein SORBIDRAFT_07g027340 [Sorghum bicolor] gb|EES14250.1| hypothetical protein SORBIDRAFT_07g027340 [Sorghum bicolor]
isotig01166	isogroup00044	1256	ref|XP_002444755.1|	hypothetical protein SORBIDRAFT_07g027340 [Sorghum bicolor] gb|EES14250.1| hypothetical protein SORBIDRAFT_07g027340 [Sorghum bicolor]
isotig01167	isogroup00044	1277	ref|XP_002444755.1|	hypothetical protein SORBIDRAFT_07g027340 [Sorghum bicolor] gb|EES14250.1| hypothetical protein SORBIDRAFT_07g027340 [Sorghum bicolor]
isotig01168	isogroup00044	1275	ref|XP_002444755.1|	hypothetical protein SORBIDRAFT_07g027340 [Sorghum bicolor] gb|EES14250.1| hypothetical protein SORBIDRAFT_07g027340 [Sorghum bicolor]
isotig01169	isogroup00044	1295	ref|XP_002444755.1|	hypothetical protein SORBIDRAFT_07g027340 [Sorghum bicolor] gb|EES14250.1| hypothetical protein SORBIDRAFT_07g027340 [Sorghum bicolor]
isotig01170	isogroup00044	1295	ref|XP_002444755.1|	hypothetical protein SORBIDRAFT_07g027340 [Sorghum bicolor] gb|EES14250.1| hypothetical protein SORBIDRAFT_07g027340 [Sorghum bicolor]
isotig01171	isogroup00044	1256	ref|XP_002444755.1|	hypothetical protein SORBIDRAFT_07g027340 [Sorghum bicolor] gb|EES14250.1| hypothetical protein SORBIDRAFT_07g027340 [Sorghum bicolor]
isotig01172	isogroup00044	1256	ref|XP_002444755.1|	hypothetical protein SORBIDRAFT_07g027340 [Sorghum bicolor] gb|EES14250.1| hypothetical protein SORBIDRAFT_07g027340 [Sorghum bicolor]
isotig01173	isogroup00044	1300	ref|XP_002444755.1|	hypothetical protein SORBIDRAFT_07g027340 [Sorghum bicolor] gb|EES14250.1| hypothetical protein SORBIDRAFT_07g027340 [Sorghum bicolor]
isotig01174	isogroup00044	1261	ref|XP_002444755.1|	hypothetical protein SORBIDRAFT_07g027340 [Sorghum bicolor] gb|EES14250.1| hypothetical protein SORBIDRAFT_07g027340 [Sorghum bicolor]
isotig01175	isogroup00044	1300	ref|XP_002444755.1|	hypothetical protein SORBIDRAFT_07g027340 [Sorghum bicolor] gb|EES14250.1| hypothetical protein SORBIDRAFT_07g027340 [Sorghum bicolor]
isotig01176	isogroup00044	1299	ref|XP_002444755.1|	hypothetical protein SORBIDRAFT_07g027340 [Sorghum bicolor] gb|EES14250.1| hypothetical protein SORBIDRAFT_07g027340 [Sorghum bicolor]
isotig01177	isogroup00044	1261	ref|XP_002444755.1|	hypothetical protein SORBIDRAFT_07g027340 [Sorghum bicolor] gb|EES14250.1| hypothetical protein SORBIDRAFT_07g027340 [Sorghum bicolor]
isotig01178	isogroup00044	1260	ref|XP_003572382.1|	PREDICTED: LOW QUALITY PROTEIN: bifunctional dihydroflavonol 4-reductase/flavanone 4-reductase-like [Brachypodium distachyon]
isotig01179	isogroup00044	403	ref|XP_002444755.1|	hypothetical protein SORBIDRAFT_07g027340 [Sorghum bicolor] gb|EES14250.1| hypothetical protein SORBIDRAFT_07g027340 [Sorghum bicolor]
isotig01180	isogroup00044	146
isotig01181	isogroup00045	1830	ref|XP_002438255.1|	hypothetical protein SORBIDRAFT_10g010640 [Sorghum bicolor] gb|EER89622.1| hypothetical protein SORBIDRAFT_10g010640 [Sorghum bicolor]
isotig01182	isogroup00045	1830	ref|XP_002438255.1|	hypothetical protein SORBIDRAFT_10g010640 [Sorghum bicolor] gb|EER89622.1| hypothetical protein SORBIDRAFT_10g010640 [Sorghum bicolor]
isotig01183	isogroup00045	1816	ref|XP_002438255.1|	hypothetical protein SORBIDRAFT_10g010640 [Sorghum bicolor] gb|EER89622.1| hypothetical protein SORBIDRAFT_10g010640 [Sorghum bicolor]
isotig01184	isogroup00045	1816	ref|XP_002438255.1|	hypothetical protein SORBIDRAFT_10g010640 [Sorghum bicolor] gb|EER89622.1| hypothetical protein SORBIDRAFT_10g010640 [Sorghum bicolor]
isotig01185	isogroup00045	1750	ref|XP_002438255.1|	hypothetical protein SORBIDRAFT_10g010640 [Sorghum bicolor] gb|EER89622.1| hypothetical protein SORBIDRAFT_10g010640 [Sorghum bicolor]
isotig01186	isogroup00045	1750	ref|XP_002438255.1|	hypothetical protein SORBIDRAFT_10g010640 [Sorghum bicolor] gb|EER89622.1| hypothetical protein SORBIDRAFT_10g010640 [Sorghum bicolor]
isotig01187	isogroup00045	1736	ref|XP_002438255.1|	hypothetical protein SORBIDRAFT_10g010640 [Sorghum bicolor] gb|EER89622.1| hypothetical protein SORBIDRAFT_10g010640 [Sorghum bicolor]
isotig01188	isogroup00045	1736	ref|XP_002438255.1|	hypothetical protein SORBIDRAFT_10g010640 [Sorghum bicolor] gb|EER89622.1| hypothetical protein SORBIDRAFT_10g010640 [Sorghum bicolor]
isotig01189	isogroup00045	1713	ref|XP_002438255.1|	hypothetical protein SORBIDRAFT_10g010640 [Sorghum bicolor] gb|EER89622.1| hypothetical protein SORBIDRAFT_10g010640 [Sorghum bicolor]
isotig01190	isogroup00045	1713	ref|XP_002438255.1|	hypothetical protein SORBIDRAFT_10g010640 [Sorghum bicolor] gb|EER89622.1| hypothetical protein SORBIDRAFT_10g010640 [Sorghum bicolor]
isotig01191	isogroup00045	1690	ref|XP_002438255.1|	hypothetical protein SORBIDRAFT_10g010640 [Sorghum bicolor] gb|EER89622.1| hypothetical protein SORBIDRAFT_10g010640 [Sorghum bicolor]
isotig01192	isogroup00045	1690	ref|XP_002438255.1|	hypothetical protein SORBIDRAFT_10g010640 [Sorghum bicolor] gb|EER89622.1| hypothetical protein SORBIDRAFT_10g010640 [Sorghum bicolor]
isotig01193	isogroup00045	1829	ref|XP_002438255.1|	hypothetical protein SORBIDRAFT_10g010640 [Sorghum bicolor] gb|EER89622.1| hypothetical protein SORBIDRAFT_10g010640 [Sorghum bicolor]
isotig01194	isogroup00045	1699	ref|XP_002438255.1|	hypothetical protein SORBIDRAFT_10g010640 [Sorghum bicolor] gb|EER89622.1| hypothetical protein SORBIDRAFT_10g010640 [Sorghum bicolor]
isotig01195	isogroup00045	1699	ref|XP_002438255.1|	hypothetical protein SORBIDRAFT_10g010640 [Sorghum bicolor] gb|EER89622.1| hypothetical protein SORBIDRAFT_10g010640 [Sorghum bicolor]
isotig01196	isogroup00045	1676	ref|XP_002438255.1|	hypothetical protein SORBIDRAFT_10g010640 [Sorghum bicolor] gb|EER89622.1| hypothetical protein SORBIDRAFT_10g010640 [Sorghum bicolor]
isotig01197	isogroup00045	1676	ref|XP_002438255.1|	hypothetical protein SORBIDRAFT_10g010640 [Sorghum bicolor] gb|EER89622.1| hypothetical protein SORBIDRAFT_10g010640 [Sorghum bicolor]
isotig01198	isogroup00045	1747	ref|XP_002438255.1|	hypothetical protein SORBIDRAFT_10g010640 [Sorghum bicolor] gb|EER89622.1| hypothetical protein SORBIDRAFT_10g010640 [Sorghum bicolor]
isotig01199	isogroup00045	1749	ref|XP_002438255.1|	hypothetical protein SORBIDRAFT_10g010640 [Sorghum bicolor] gb|EER89622.1| hypothetical protein SORBIDRAFT_10g010640 [Sorghum bicolor]
isotig01200	isogroup00045	1733	ref|XP_002438255.1|	hypothetical protein SORBIDRAFT_10g010640 [Sorghum bicolor] gb|EER89622.1| hypothetical protein SORBIDRAFT_10g010640 [Sorghum bicolor]
isotig01201	isogroup00045	1710	ref|XP_002438255.1|	hypothetical protein SORBIDRAFT_10g010640 [Sorghum bicolor] gb|EER89622.1| hypothetical protein SORBIDRAFT_10g010640 [Sorghum bicolor]
isotig01202	isogroup00045	1712	ref|XP_002438255.1|	hypothetical protein SORBIDRAFT_10g010640 [Sorghum bicolor] gb|EER89622.1| hypothetical protein SORBIDRAFT_10g010640 [Sorghum bicolor]
isotig01203	isogroup00045	1687	ref|XP_002438255.1|	hypothetical protein SORBIDRAFT_10g010640 [Sorghum bicolor] gb|EER89622.1| hypothetical protein SORBIDRAFT_10g010640 [Sorghum bicolor]
isotig01204	isogroup00045	1689	ref|XP_002438255.1|	hypothetical protein SORBIDRAFT_10g010640 [Sorghum bicolor] gb|EER89622.1| hypothetical protein SORBIDRAFT_10g010640 [Sorghum bicolor]
isotig01205	isogroup00045	1696	ref|XP_002438255.1|	hypothetical protein SORBIDRAFT_10g010640 [Sorghum bicolor] gb|EER89622.1| hypothetical protein SORBIDRAFT_10g010640 [Sorghum bicolor]
isotig01206	isogroup00045	1673	ref|XP_002438255.1|	hypothetical protein SORBIDRAFT_10g010640 [Sorghum bicolor] gb|EER89622.1| hypothetical protein SORBIDRAFT_10g010640 [Sorghum bicolor]
isotig01207	isogroup00045	1584	ref|XP_002438255.1|	hypothetical protein SORBIDRAFT_10g010640 [Sorghum bicolor] gb|EER89622.1| hypothetical protein SORBIDRAFT_10g010640 [Sorghum bicolor]
isotig01208	isogroup00045	1584	ref|XP_002438255.1|	hypothetical protein SORBIDRAFT_10g010640 [Sorghum bicolor] gb|EER89622.1| hypothetical protein SORBIDRAFT_10g010640 [Sorghum bicolor]
isotig01209	isogroup00045	1584	ref|XP_002438255.1|	hypothetical protein SORBIDRAFT_10g010640 [Sorghum bicolor] gb|EER89622.1| hypothetical protein SORBIDRAFT_10g010640 [Sorghum bicolor]
isotig01210	isogroup00045	1584	ref|XP_002438255.1|	hypothetical protein SORBIDRAFT_10g010640 [Sorghum bicolor] gb|EER89622.1| hypothetical protein SORBIDRAFT_10g010640 [Sorghum bicolor]
isotig01211	isogroup00045	1570	ref|XP_002438255.1|	hypothetical protein SORBIDRAFT_10g010640 [Sorghum bicolor] gb|EER89622.1| hypothetical protein SORBIDRAFT_10g010640 [Sorghum bicolor]
isotig01212	isogroup00045	1570	ref|XP_002438255.1|	hypothetical protein SORBIDRAFT_10g010640 [Sorghum bicolor] gb|EER89622.1| hypothetical protein SORBIDRAFT_10g010640 [Sorghum bicolor]
isotig01213	isogroup00045	1570	ref|XP_002438255.1|	hypothetical protein SORBIDRAFT_10g010640 [Sorghum bicolor] gb|EER89622.1| hypothetical protein SORBIDRAFT_10g010640 [Sorghum bicolor]
isotig01214	isogroup00045	1570	ref|XP_002438255.1|	hypothetical protein SORBIDRAFT_10g010640 [Sorghum bicolor] gb|EER89622.1| hypothetical protein SORBIDRAFT_10g010640 [Sorghum bicolor]
isotig01215	isogroup00045	1583	ref|XP_002438255.1|	hypothetical protein SORBIDRAFT_10g010640 [Sorghum bicolor] gb|EER89622.1| hypothetical protein SORBIDRAFT_10g010640 [Sorghum bicolor]
isotig01216	isogroup00045	1583	ref|XP_002438255.1|	hypothetical protein SORBIDRAFT_10g010640 [Sorghum bicolor] gb|EER89622.1| hypothetical protein SORBIDRAFT_10g010640 [Sorghum bicolor]
isotig01217	isogroup00045	1355	ref|XP_002438255.1|	hypothetical protein SORBIDRAFT_10g010640 [Sorghum bicolor] gb|EER89622.1| hypothetical protein SORBIDRAFT_10g010640 [Sorghum bicolor]
isotig01218	isogroup00045	1341	ref|XP_002438255.1|	hypothetical protein SORBIDRAFT_10g010640 [Sorghum bicolor] gb|EER89622.1| hypothetical protein SORBIDRAFT_10g010640 [Sorghum bicolor]
isotig01219	isogroup00045	505	ref|XP_002438255.1|	hypothetical protein SORBIDRAFT_10g010640 [Sorghum bicolor] gb|EER89622.1| hypothetical protein SORBIDRAFT_10g010640 [Sorghum bicolor]
isotig01220	isogroup00048	3997	tpg|DAA59134.1|	TPA: putative RNA binding domain family protein [Zea mays]
isotig01221	isogroup00048	3997	tpg|DAA59134.1|	TPA: putative RNA binding domain family protein [Zea mays]
isotig01222	isogroup00048	3991	tpg|DAA59134.1|	TPA: putative RNA binding domain family protein [Zea mays]
isotig01223	isogroup00048	3991	tpg|DAA59134.1|	TPA: putative RNA binding domain family protein [Zea mays]
isotig01224	isogroup00048	3990	tpg|DAA59134.1|	TPA: putative RNA binding domain family protein [Zea mays]
isotig01225	isogroup00048	3991	tpg|DAA59134.1|	TPA: putative RNA binding domain family protein [Zea mays]
isotig01226	isogroup00048	3997	tpg|DAA59134.1|	TPA: putative RNA binding domain family protein [Zea mays]
isotig01227	isogroup00048	3991	tpg|DAA59134.1|	TPA: putative RNA binding domain family protein [Zea mays]
isotig01228	isogroup00048	3990	tpg|DAA59134.1|	TPA: putative RNA binding domain family protein [Zea mays]
isotig01229	isogroup00048	3997	tpg|DAA59134.1|	TPA: putative RNA binding domain family protein [Zea mays]
isotig01230	isogroup00048	3997	tpg|DAA59134.1|	TPA: putative RNA binding domain family protein [Zea mays]
isotig01231	isogroup00048	3997	tpg|DAA59134.1|	TPA: putative RNA binding domain family protein [Zea mays]
isotig01232	isogroup00048	3985	tpg|DAA59134.1|	TPA: putative RNA binding domain family protein [Zea mays]
isotig01233	isogroup00048	3991	tpg|DAA59134.1|	TPA: putative RNA binding domain family protein [Zea mays]
isotig01234	isogroup00048	3985	tpg|DAA59134.1|	TPA: putative RNA binding domain family protein [Zea mays]
isotig01235	isogroup00048	3991	tpg|DAA59134.1|	TPA: putative RNA binding domain family protein [Zea mays]
isotig01236	isogroup00048	3991	tpg|DAA59134.1|	TPA: putative RNA binding domain family protein [Zea mays]
isotig01237	isogroup00048	3991	tpg|DAA59134.1|	TPA: putative RNA binding domain family protein [Zea mays]
isotig01238	isogroup00048	3987	ref|XP_002448849.1|	hypothetical protein SORBIDRAFT_05g000270 [Sorghum bicolor] gb|EES07837.1| hypothetical protein SORBIDRAFT_05g000270 [Sorghum bicolor]
isotig01239	isogroup00048	3987	ref|XP_002448849.1|	hypothetical protein SORBIDRAFT_05g000270 [Sorghum bicolor] gb|EES07837.1| hypothetical protein SORBIDRAFT_05g000270 [Sorghum bicolor]
isotig01240	isogroup00048	3984	tpg|DAA59134.1|	TPA: putative RNA binding domain family protein [Zea mays]
isotig01241	isogroup00048	3990	tpg|DAA59134.1|	TPA: putative RNA binding domain family protein [Zea mays]
isotig01242	isogroup00048	3991	tpg|DAA59134.1|	TPA: putative RNA binding domain family protein [Zea mays]
isotig01243	isogroup00048	3984	tpg|DAA59134.1|	TPA: putative RNA binding domain family protein [Zea mays]
isotig01244	isogroup00048	3991	tpg|DAA59134.1|	TPA: putative RNA binding domain family protein [Zea mays]
isotig01245	isogroup00048	3990	tpg|DAA59134.1|	TPA: putative RNA binding domain family protein [Zea mays]
isotig01246	isogroup00048	3990	tpg|DAA59134.1|	TPA: putative RNA binding domain family protein [Zea mays]
isotig01247	isogroup00048	3991	tpg|DAA59134.1|	TPA: putative RNA binding domain family protein [Zea mays]
isotig01248	isogroup00048	3991	tpg|DAA59134.1|	TPA: putative RNA binding domain family protein [Zea mays]
isotig01249	isogroup00048	3990	tpg|DAA59134.1|	TPA: putative RNA binding domain family protein [Zea mays]
isotig01250	isogroup00048	3981	ref|XP_002448849.1|	hypothetical protein SORBIDRAFT_05g000270 [Sorghum bicolor] gb|EES07837.1| hypothetical protein SORBIDRAFT_05g000270 [Sorghum bicolor]
isotig01251	isogroup00048	3981	ref|XP_002448849.1|	hypothetical protein SORBIDRAFT_05g000270 [Sorghum bicolor] gb|EES07837.1| hypothetical protein SORBIDRAFT_05g000270 [Sorghum bicolor]
isotig01252	isogroup00048	3985	tpg|DAA59134.1|	TPA: putative RNA binding domain family protein [Zea mays]
isotig01253	isogroup00048	3985	tpg|DAA59134.1|	TPA: putative RNA binding domain family protein [Zea mays]
isotig01254	isogroup00048	3985	tpg|DAA59134.1|	TPA: putative RNA binding domain family protein [Zea mays]
isotig01255	isogroup00048	3985	tpg|DAA59134.1|	TPA: putative RNA binding domain family protein [Zea mays]
isotig01256	isogroup00048	3981	ref|XP_002448849.1|	hypothetical protein SORBIDRAFT_05g000270 [Sorghum bicolor] gb|EES07837.1| hypothetical protein SORBIDRAFT_05g000270 [Sorghum bicolor]
isotig01257	isogroup00048	3981	ref|XP_002448849.1|	hypothetical protein SORBIDRAFT_05g000270 [Sorghum bicolor] gb|EES07837.1| hypothetical protein SORBIDRAFT_05g000270 [Sorghum bicolor]
isotig01258	isogroup00048	3987	ref|XP_002448849.1|	hypothetical protein SORBIDRAFT_05g000270 [Sorghum bicolor] gb|EES07837.1| hypothetical protein SORBIDRAFT_05g000270 [Sorghum bicolor]
isotig01259	isogroup00048	3981	ref|XP_002448849.1|	hypothetical protein SORBIDRAFT_05g000270 [Sorghum bicolor] gb|EES07837.1| hypothetical protein SORBIDRAFT_05g000270 [Sorghum bicolor]
isotig01260	isogroup00048	3981	ref|XP_002448849.1|	hypothetical protein SORBIDRAFT_05g000270 [Sorghum bicolor] gb|EES07837.1| hypothetical protein SORBIDRAFT_05g000270 [Sorghum bicolor]
isotig01261	isogroup00048	3987	ref|XP_002448849.1|	hypothetical protein SORBIDRAFT_05g000270 [Sorghum bicolor] gb|EES07837.1| hypothetical protein SORBIDRAFT_05g000270 [Sorghum bicolor]
isotig01262	isogroup00048	3987	ref|XP_002448849.1|	hypothetical protein SORBIDRAFT_05g000270 [Sorghum bicolor] gb|EES07837.1| hypothetical protein SORBIDRAFT_05g000270 [Sorghum bicolor]
isotig01263	isogroup00048	3987	ref|XP_002448849.1|	hypothetical protein SORBIDRAFT_05g000270 [Sorghum bicolor] gb|EES07837.1| hypothetical protein SORBIDRAFT_05g000270 [Sorghum bicolor]
isotig01264	isogroup00048	3984	tpg|DAA59134.1|	TPA: putative RNA binding domain family protein [Zea mays]
isotig01265	isogroup00048	3984	tpg|DAA59134.1|	TPA: putative RNA binding domain family protein [Zea mays]
isotig01266	isogroup00048	3984	tpg|DAA59134.1|	TPA: putative RNA binding domain family protein [Zea mays]
isotig01267	isogroup00048	3984	tpg|DAA59134.1|	TPA: putative RNA binding domain family protein [Zea mays]
isotig01268	isogroup00048	3975	ref|XP_002448849.1|	hypothetical protein SORBIDRAFT_05g000270 [Sorghum bicolor] gb|EES07837.1| hypothetical protein SORBIDRAFT_05g000270 [Sorghum bicolor]
isotig01269	isogroup00048	3981	ref|XP_002448849.1|	hypothetical protein SORBIDRAFT_05g000270 [Sorghum bicolor] gb|EES07837.1| hypothetical protein SORBIDRAFT_05g000270 [Sorghum bicolor]
isotig01270	isogroup00048	3975	ref|XP_002448849.1|	hypothetical protein SORBIDRAFT_05g000270 [Sorghum bicolor] gb|EES07837.1| hypothetical protein SORBIDRAFT_05g000270 [Sorghum bicolor]
isotig01271	isogroup00048	3981	ref|XP_002448849.1|	hypothetical protein SORBIDRAFT_05g000270 [Sorghum bicolor] gb|EES07837.1| hypothetical protein SORBIDRAFT_05g000270 [Sorghum bicolor]
isotig01272	isogroup00048	3981	ref|XP_002448849.1|	hypothetical protein SORBIDRAFT_05g000270 [Sorghum bicolor] gb|EES07837.1| hypothetical protein SORBIDRAFT_05g000270 [Sorghum bicolor]
isotig01273	isogroup00048	3981	ref|XP_002448849.1|	hypothetical protein SORBIDRAFT_05g000270 [Sorghum bicolor] gb|EES07837.1| hypothetical protein SORBIDRAFT_05g000270 [Sorghum bicolor]
isotig01274	isogroup00048	3975	ref|XP_002448849.1|	hypothetical protein SORBIDRAFT_05g000270 [Sorghum bicolor] gb|EES07837.1| hypothetical protein SORBIDRAFT_05g000270 [Sorghum bicolor]
isotig01275	isogroup00048	3981	ref|XP_002448849.1|	hypothetical protein SORBIDRAFT_05g000270 [Sorghum bicolor] gb|EES07837.1| hypothetical protein SORBIDRAFT_05g000270 [Sorghum bicolor]
isotig01276	isogroup00048	3981	ref|XP_002448849.1|	hypothetical protein SORBIDRAFT_05g000270 [Sorghum bicolor] gb|EES07837.1| hypothetical protein SORBIDRAFT_05g000270 [Sorghum bicolor]
isotig01277	isogroup00048	3975	ref|XP_002448849.1|	hypothetical protein SORBIDRAFT_05g000270 [Sorghum bicolor] gb|EES07837.1| hypothetical protein SORBIDRAFT_05g000270 [Sorghum bicolor]
isotig01278	isogroup00048	3981	ref|XP_002448849.1|	hypothetical protein SORBIDRAFT_05g000270 [Sorghum bicolor] gb|EES07837.1| hypothetical protein SORBIDRAFT_05g000270 [Sorghum bicolor]
isotig01279	isogroup00048	3981	ref|XP_002448849.1|	hypothetical protein SORBIDRAFT_05g000270 [Sorghum bicolor] gb|EES07837.1| hypothetical protein SORBIDRAFT_05g000270 [Sorghum bicolor]
isotig01280	isogroup00048	3981	ref|XP_002448849.1|	hypothetical protein SORBIDRAFT_05g000270 [Sorghum bicolor] gb|EES07837.1| hypothetical protein SORBIDRAFT_05g000270 [Sorghum bicolor]
isotig01281	isogroup00048	3981	ref|XP_002448849.1|	hypothetical protein SORBIDRAFT_05g000270 [Sorghum bicolor] gb|EES07837.1| hypothetical protein SORBIDRAFT_05g000270 [Sorghum bicolor]
isotig01282	isogroup00048	3981	ref|XP_002448849.1|	hypothetical protein SORBIDRAFT_05g000270 [Sorghum bicolor] gb|EES07837.1| hypothetical protein SORBIDRAFT_05g000270 [Sorghum bicolor]
isotig01283	isogroup00048	3981	ref|XP_002448849.1|	hypothetical protein SORBIDRAFT_05g000270 [Sorghum bicolor] gb|EES07837.1| hypothetical protein SORBIDRAFT_05g000270 [Sorghum bicolor]
isotig01284	isogroup00048	3975	ref|XP_002448849.1|	hypothetical protein SORBIDRAFT_05g000270 [Sorghum bicolor] gb|EES07837.1| hypothetical protein SORBIDRAFT_05g000270 [Sorghum bicolor]
isotig01285	isogroup00048	3975	ref|XP_002448849.1|	hypothetical protein SORBIDRAFT_05g000270 [Sorghum bicolor] gb|EES07837.1| hypothetical protein SORBIDRAFT_05g000270 [Sorghum bicolor]
isotig01286	isogroup00048	3975	ref|XP_002448849.1|	hypothetical protein SORBIDRAFT_05g000270 [Sorghum bicolor] gb|EES07837.1| hypothetical protein SORBIDRAFT_05g000270 [Sorghum bicolor]
isotig01287	isogroup00048	3975	ref|XP_002448849.1|	hypothetical protein SORBIDRAFT_05g000270 [Sorghum bicolor] gb|EES07837.1| hypothetical protein SORBIDRAFT_05g000270 [Sorghum bicolor]
isotig01288	isogroup00048	3975	ref|XP_002448849.1|	hypothetical protein SORBIDRAFT_05g000270 [Sorghum bicolor] gb|EES07837.1| hypothetical protein SORBIDRAFT_05g000270 [Sorghum bicolor]
isotig01289	isogroup00048	3975	ref|XP_002448849.1|	hypothetical protein SORBIDRAFT_05g000270 [Sorghum bicolor] gb|EES07837.1| hypothetical protein SORBIDRAFT_05g000270 [Sorghum bicolor]
isotig01290	isogroup00048	3975	ref|XP_002448849.1|	hypothetical protein SORBIDRAFT_05g000270 [Sorghum bicolor] gb|EES07837.1| hypothetical protein SORBIDRAFT_05g000270 [Sorghum bicolor]
isotig01291	isogroup00048	3975	ref|XP_002448849.1|	hypothetical protein SORBIDRAFT_05g000270 [Sorghum bicolor] gb|EES07837.1| hypothetical protein SORBIDRAFT_05g000270 [Sorghum bicolor]
isotig01292	isogroup00048	2307	tpg|DAA59134.1|	TPA: putative RNA binding domain family protein [Zea mays]
isotig01293	isogroup00048	2307	tpg|DAA59134.1|	TPA: putative RNA binding domain family protein [Zea mays]
isotig01294	isogroup00048	2307	tpg|DAA59134.1|	TPA: putative RNA binding domain family protein [Zea mays]
isotig01295	isogroup00048	2299	tpg|DAA59135.1|	TPA: putative RNA binding domain family protein [Zea mays]
isotig01296	isogroup00048	2299	tpg|DAA59135.1|	TPA: putative RNA binding domain family protein [Zea mays]
isotig01297	isogroup00048	2299	tpg|DAA59135.1|	TPA: putative RNA binding domain family protein [Zea mays]
isotig01298	isogroup00049	4261	tpg|DAA40884.1|	TPA: putative leucine-rich repeat receptor-like protein kinase family protein [Zea mays]
isotig01299	isogroup00049	4262	ref|XP_002460722.1|	hypothetical protein SORBIDRAFT_02g033810 [Sorghum bicolor] gb|EER97243.1| hypothetical protein SORBIDRAFT_02g033810 [Sorghum bicolor]
isotig01300	isogroup00049	4263	tpg|DAA40884.1|	TPA: putative leucine-rich repeat receptor-like protein kinase family protein [Zea mays]
isotig01301	isogroup00049	4267	tpg|DAA40884.1|	TPA: putative leucine-rich repeat receptor-like protein kinase family protein [Zea mays]
isotig01302	isogroup00049	4268	ref|XP_002460722.1|	hypothetical protein SORBIDRAFT_02g033810 [Sorghum bicolor] gb|EER97243.1| hypothetical protein SORBIDRAFT_02g033810 [Sorghum bicolor]
isotig01303	isogroup00049	4269	tpg|DAA40884.1|	TPA: putative leucine-rich repeat receptor-like protein kinase family protein [Zea mays]
isotig01304	isogroup00049	3927	ref|XP_002460722.1|	hypothetical protein SORBIDRAFT_02g033810 [Sorghum bicolor] gb|EER97243.1| hypothetical protein SORBIDRAFT_02g033810 [Sorghum bicolor]
isotig01305	isogroup00049	3927	ref|XP_002460722.1|	hypothetical protein SORBIDRAFT_02g033810 [Sorghum bicolor] gb|EER97243.1| hypothetical protein SORBIDRAFT_02g033810 [Sorghum bicolor]
isotig01306	isogroup00049	3927	ref|XP_002460722.1|	hypothetical protein SORBIDRAFT_02g033810 [Sorghum bicolor] gb|EER97243.1| hypothetical protein SORBIDRAFT_02g033810 [Sorghum bicolor]
isotig01307	isogroup00049	3927	ref|XP_002460722.1|	hypothetical protein SORBIDRAFT_02g033810 [Sorghum bicolor] gb|EER97243.1| hypothetical protein SORBIDRAFT_02g033810 [Sorghum bicolor]
isotig01308	isogroup00049	3927	ref|XP_002460722.1|	hypothetical protein SORBIDRAFT_02g033810 [Sorghum bicolor] gb|EER97243.1| hypothetical protein SORBIDRAFT_02g033810 [Sorghum bicolor]
isotig01309	isogroup00049	3933	ref|XP_002460722.1|	hypothetical protein SORBIDRAFT_02g033810 [Sorghum bicolor] gb|EER97243.1| hypothetical protein SORBIDRAFT_02g033810 [Sorghum bicolor]
isotig01310	isogroup00049	3933	ref|XP_002460722.1|	hypothetical protein SORBIDRAFT_02g033810 [Sorghum bicolor] gb|EER97243.1| hypothetical protein SORBIDRAFT_02g033810 [Sorghum bicolor]
isotig01311	isogroup00049	3927	ref|XP_002460722.1|	hypothetical protein SORBIDRAFT_02g033810 [Sorghum bicolor] gb|EER97243.1| hypothetical protein SORBIDRAFT_02g033810 [Sorghum bicolor]
isotig01312	isogroup00049	3933	ref|XP_002460722.1|	hypothetical protein SORBIDRAFT_02g033810 [Sorghum bicolor] gb|EER97243.1| hypothetical protein SORBIDRAFT_02g033810 [Sorghum bicolor]
isotig01313	isogroup00049	3933	ref|XP_002460722.1|	hypothetical protein SORBIDRAFT_02g033810 [Sorghum bicolor] gb|EER97243.1| hypothetical protein SORBIDRAFT_02g033810 [Sorghum bicolor]
isotig01314	isogroup00049	3933	ref|XP_002460722.1|	hypothetical protein SORBIDRAFT_02g033810 [Sorghum bicolor] gb|EER97243.1| hypothetical protein SORBIDRAFT_02g033810 [Sorghum bicolor]
isotig01315	isogroup00049	3933	ref|XP_002460722.1|	hypothetical protein SORBIDRAFT_02g033810 [Sorghum bicolor] gb|EER97243.1| hypothetical protein SORBIDRAFT_02g033810 [Sorghum bicolor]
isotig01316	isogroup00049	3771	ref|XP_002460722.1|	hypothetical protein SORBIDRAFT_02g033810 [Sorghum bicolor] gb|EER97243.1| hypothetical protein SORBIDRAFT_02g033810 [Sorghum bicolor]
isotig01317	isogroup00049	3771	ref|XP_002460722.1|	hypothetical protein SORBIDRAFT_02g033810 [Sorghum bicolor] gb|EER97243.1| hypothetical protein SORBIDRAFT_02g033810 [Sorghum bicolor]
isotig01318	isogroup00049	3771	ref|XP_002460722.1|	hypothetical protein SORBIDRAFT_02g033810 [Sorghum bicolor] gb|EER97243.1| hypothetical protein SORBIDRAFT_02g033810 [Sorghum bicolor]
isotig01319	isogroup00049	3771	ref|XP_002460722.1|	hypothetical protein SORBIDRAFT_02g033810 [Sorghum bicolor] gb|EER97243.1| hypothetical protein SORBIDRAFT_02g033810 [Sorghum bicolor]
isotig01320	isogroup00049	3771	ref|XP_002460722.1|	hypothetical protein SORBIDRAFT_02g033810 [Sorghum bicolor] gb|EER97243.1| hypothetical protein SORBIDRAFT_02g033810 [Sorghum bicolor]
isotig01321	isogroup00049	3777	ref|XP_002460722.1|	hypothetical protein SORBIDRAFT_02g033810 [Sorghum bicolor] gb|EER97243.1| hypothetical protein SORBIDRAFT_02g033810 [Sorghum bicolor]
isotig01322	isogroup00049	3777	ref|XP_002460722.1|	hypothetical protein SORBIDRAFT_02g033810 [Sorghum bicolor] gb|EER97243.1| hypothetical protein SORBIDRAFT_02g033810 [Sorghum bicolor]
isotig01323	isogroup00049	3771	ref|XP_002460722.1|	hypothetical protein SORBIDRAFT_02g033810 [Sorghum bicolor] gb|EER97243.1| hypothetical protein SORBIDRAFT_02g033810 [Sorghum bicolor]
isotig01324	isogroup00049	3777	ref|XP_002460722.1|	hypothetical protein SORBIDRAFT_02g033810 [Sorghum bicolor] gb|EER97243.1| hypothetical protein SORBIDRAFT_02g033810 [Sorghum bicolor]
isotig01325	isogroup00049	3777	ref|XP_002460722.1|	hypothetical protein SORBIDRAFT_02g033810 [Sorghum bicolor] gb|EER97243.1| hypothetical protein SORBIDRAFT_02g033810 [Sorghum bicolor]
isotig01326	isogroup00049	3777	ref|XP_002460722.1|	hypothetical protein SORBIDRAFT_02g033810 [Sorghum bicolor] gb|EER97243.1| hypothetical protein SORBIDRAFT_02g033810 [Sorghum bicolor]
isotig01327	isogroup00049	3777	ref|XP_002460722.1|	hypothetical protein SORBIDRAFT_02g033810 [Sorghum bicolor] gb|EER97243.1| hypothetical protein SORBIDRAFT_02g033810 [Sorghum bicolor]
isotig01328	isogroup00049	2455	tpg|DAA40884.1|	TPA: putative leucine-rich repeat receptor-like protein kinase family protein [Zea mays]
isotig01329	isogroup00049	2350	ref|XP_002460722.1|	hypothetical protein SORBIDRAFT_02g033810 [Sorghum bicolor] gb|EER97243.1| hypothetical protein SORBIDRAFT_02g033810 [Sorghum bicolor]
isotig01330	isogroup00049	2356	ref|XP_002460722.1|	hypothetical protein SORBIDRAFT_02g033810 [Sorghum bicolor] gb|EER97243.1| hypothetical protein SORBIDRAFT_02g033810 [Sorghum bicolor]
isotig01331	isogroup00049	2071	ref|NP_001168291.1|	uncharacterized protein LOC100382055 [Zea mays] gb|ACN27712.1| unknown [Zea mays]
isotig01332	isogroup00049	2123	ref|XP_002460722.1|	hypothetical protein SORBIDRAFT_02g033810 [Sorghum bicolor] gb|EER97243.1| hypothetical protein SORBIDRAFT_02g033810 [Sorghum bicolor]
isotig01333	isogroup00049	2123	ref|XP_002460722.1|	hypothetical protein SORBIDRAFT_02g033810 [Sorghum bicolor] gb|EER97243.1| hypothetical protein SORBIDRAFT_02g033810 [Sorghum bicolor]
isotig01334	isogroup00049	2077	ref|NP_001168291.1|	uncharacterized protein LOC100382055 [Zea mays] gb|ACN27712.1| unknown [Zea mays]
isotig01335	isogroup00049	1967	ref|XP_002460722.1|	hypothetical protein SORBIDRAFT_02g033810 [Sorghum bicolor] gb|EER97243.1| hypothetical protein SORBIDRAFT_02g033810 [Sorghum bicolor]
isotig01336	isogroup00049	1967	ref|XP_002460722.1|	hypothetical protein SORBIDRAFT_02g033810 [Sorghum bicolor] gb|EER97243.1| hypothetical protein SORBIDRAFT_02g033810 [Sorghum bicolor]
isotig01337	isogroup00049	1853	tpg|DAA40884.1|	TPA: putative leucine-rich repeat receptor-like protein kinase family protein [Zea mays]
isotig01338	isogroup00049	1519	ref|XP_002460722.1|	hypothetical protein SORBIDRAFT_02g033810 [Sorghum bicolor] gb|EER97243.1| hypothetical protein SORBIDRAFT_02g033810 [Sorghum bicolor]
isotig01339	isogroup00049	1519	ref|XP_002460722.1|	hypothetical protein SORBIDRAFT_02g033810 [Sorghum bicolor] gb|EER97243.1| hypothetical protein SORBIDRAFT_02g033810 [Sorghum bicolor]
isotig01340	isogroup00049	1363	ref|XP_002460722.1|	hypothetical protein SORBIDRAFT_02g033810 [Sorghum bicolor] gb|EER97243.1| hypothetical protein SORBIDRAFT_02g033810 [Sorghum bicolor]
isotig01341	isogroup00049	1363	ref|XP_002460722.1|	hypothetical protein SORBIDRAFT_02g033810 [Sorghum bicolor] gb|EER97243.1| hypothetical protein SORBIDRAFT_02g033810 [Sorghum bicolor]
isotig01342	isogroup00050	1249	gb|ACG37671.1|	aspartic acid-rich protein [Zea mays]
isotig01343	isogroup00050	1256	gb|ACG37671.1|	aspartic acid-rich protein [Zea mays]
isotig01344	isogroup00050	1243	gb|ACG37671.1|	aspartic acid-rich protein [Zea mays]
isotig01345	isogroup00050	1237	gb|ACG37671.1|	aspartic acid-rich protein [Zea mays]
isotig01346	isogroup00050	1237	gb|ACG37671.1|	aspartic acid-rich protein [Zea mays]
isotig01347	isogroup00050	1250	gb|ACG37671.1|	aspartic acid-rich protein [Zea mays]
isotig01348	isogroup00050	1244	gb|ACG37671.1|	aspartic acid-rich protein [Zea mays]
isotig01349	isogroup00050	1244	gb|ACG37671.1|	aspartic acid-rich protein [Zea mays]
isotig01350	isogroup00050	1249	gb|ACG37671.1|	aspartic acid-rich protein [Zea mays]
isotig01351	isogroup00050	1256	gb|ACG37671.1|	aspartic acid-rich protein [Zea mays]
isotig01352	isogroup00050	1249	gb|ACG37671.1|	aspartic acid-rich protein [Zea mays]
isotig01353	isogroup00050	1256	gb|ACG37671.1|	aspartic acid-rich protein [Zea mays]
isotig01354	isogroup00050	1255	gb|ACG37671.1|	aspartic acid-rich protein [Zea mays]
isotig01355	isogroup00050	1262	gb|ACG37671.1|	aspartic acid-rich protein [Zea mays]
isotig01356	isogroup00050	1225	gb|ACG37671.1|	aspartic acid-rich protein [Zea mays]
isotig01357	isogroup00050	1232	gb|ACG37671.1|	aspartic acid-rich protein [Zea mays]
isotig01358	isogroup00050	1219	gb|ACG37671.1|	aspartic acid-rich protein [Zea mays]
isotig01359	isogroup00050	1213	gb|ACG37671.1|	aspartic acid-rich protein [Zea mays]
isotig01360	isogroup00050	1213	gb|ACG37671.1|	aspartic acid-rich protein [Zea mays]
isotig01361	isogroup00050	1260	gb|ACG37671.1|	aspartic acid-rich protein [Zea mays]
isotig01362	isogroup00050	1253	gb|ACG37671.1|	aspartic acid-rich protein [Zea mays]
isotig01363	isogroup00050	1226	gb|ACG37671.1|	aspartic acid-rich protein [Zea mays]
isotig01364	isogroup00050	1220	gb|ACG37671.1|	aspartic acid-rich protein [Zea mays]
isotig01365	isogroup00050	1220	gb|ACG37671.1|	aspartic acid-rich protein [Zea mays]
isotig01366	isogroup00050	1225	gb|ACG37671.1|	aspartic acid-rich protein [Zea mays]
isotig01367	isogroup00050	1251	gb|ACG37671.1|	aspartic acid-rich protein [Zea mays]
isotig01368	isogroup00050	1232	gb|ACG37671.1|	aspartic acid-rich protein [Zea mays]
isotig01369	isogroup00050	1225	gb|ACG37671.1|	aspartic acid-rich protein [Zea mays]
isotig01370	isogroup00050	1232	gb|ACG37671.1|	aspartic acid-rich protein [Zea mays]
isotig01371	isogroup00050	1231	gb|ACG37671.1|	aspartic acid-rich protein [Zea mays]
isotig01372	isogroup00050	1238	gb|ACG37671.1|	aspartic acid-rich protein [Zea mays]
isotig01373	isogroup00050	1236	gb|ACG37671.1|	aspartic acid-rich protein [Zea mays]
isotig01374	isogroup00050	1229	gb|ACG37671.1|	aspartic acid-rich protein [Zea mays]
isotig01375	isogroup00050	1227	gb|ACG37671.1|	aspartic acid-rich protein [Zea mays]
isotig01376	isogroup00050	718	gb|ACG37671.1|	aspartic acid-rich protein [Zea mays]
isotig01377	isogroup00050	713	gb|ACG37671.1|	aspartic acid-rich protein [Zea mays]
isotig01378	isogroup00050	707	gb|ACG37671.1|	aspartic acid-rich protein [Zea mays]
isotig01379	isogroup00050	706	gb|ACG37671.1|	aspartic acid-rich protein [Zea mays]
isotig01380	isogroup00050	718	gb|ACG37671.1|	aspartic acid-rich protein [Zea mays]
isotig01381	isogroup00050	694	gb|ACG37671.1|	aspartic acid-rich protein [Zea mays]
isotig01382	isogroup00050	689	gb|ACG37671.1|	aspartic acid-rich protein [Zea mays]
isotig01383	isogroup00050	683	gb|ACG37671.1|	aspartic acid-rich protein [Zea mays]
isotig01384	isogroup00050	682	gb|ACG37671.1|	aspartic acid-rich protein [Zea mays]
isotig01385	isogroup00050	694	gb|ACG37671.1|	aspartic acid-rich protein [Zea mays]
isotig01386	isogroup00051	3544	gb|ACN27562.1|	unknown [Zea mays] gb|AFW63032.1| oxidoreductase [Zea mays]
isotig01387	isogroup00051	3550	gb|ACN27562.1|	unknown [Zea mays] gb|AFW63032.1| oxidoreductase [Zea mays]
isotig01388	isogroup00051	3547	gb|ACN27562.1|	unknown [Zea mays] gb|AFW63032.1| oxidoreductase [Zea mays]
isotig01389	isogroup00051	3541	gb|ACN27562.1|	unknown [Zea mays] gb|AFW63032.1| oxidoreductase [Zea mays]
isotig01390	isogroup00051	3529	gb|ACN27562.1|	unknown [Zea mays] gb|AFW63032.1| oxidoreductase [Zea mays]
isotig01391	isogroup00051	3544	gb|ACN27562.1|	unknown [Zea mays] gb|AFW63032.1| oxidoreductase [Zea mays]
isotig01392	isogroup00051	3553	gb|ACN27562.1|	unknown [Zea mays] gb|AFW63032.1| oxidoreductase [Zea mays]
isotig01393	isogroup00051	3547	gb|ACN27562.1|	unknown [Zea mays] gb|AFW63032.1| oxidoreductase [Zea mays]
isotig01394	isogroup00051	3544	gb|ACN27562.1|	unknown [Zea mays] gb|AFW63032.1| oxidoreductase [Zea mays]
isotig01395	isogroup00051	3532	gb|ACN27562.1|	unknown [Zea mays] gb|AFW63032.1| oxidoreductase [Zea mays]
isotig01396	isogroup00051	3550	gb|ACN27562.1|	unknown [Zea mays] gb|AFW63032.1| oxidoreductase [Zea mays]
isotig01397	isogroup00051	3550	gb|ACN27562.1|	unknown [Zea mays] gb|AFW63032.1| oxidoreductase [Zea mays]
isotig01398	isogroup00051	3547	gb|ACN27562.1|	unknown [Zea mays] gb|AFW63032.1| oxidoreductase [Zea mays]
isotig01399	isogroup00051	3526	gb|ACN27562.1|	unknown [Zea mays] gb|AFW63032.1| oxidoreductase [Zea mays]
isotig01400	isogroup00051	3541	gb|ACN27562.1|	unknown [Zea mays] gb|AFW63032.1| oxidoreductase [Zea mays]
isotig01401	isogroup00051	3529	gb|ACN27562.1|	unknown [Zea mays] gb|AFW63032.1| oxidoreductase [Zea mays]
isotig01402	isogroup00051	3550	gb|ACN27562.1|	unknown [Zea mays] gb|AFW63032.1| oxidoreductase [Zea mays]
isotig01403	isogroup00051	3556	gb|ACN27562.1|	unknown [Zea mays] gb|AFW63032.1| oxidoreductase [Zea mays]
isotig01404	isogroup00051	3553	gb|ACN27562.1|	unknown [Zea mays] gb|AFW63032.1| oxidoreductase [Zea mays]
isotig01405	isogroup00051	3529	gb|ACN27562.1|	unknown [Zea mays] gb|AFW63032.1| oxidoreductase [Zea mays]
isotig01406	isogroup00051	3547	gb|ACN27562.1|	unknown [Zea mays] gb|AFW63032.1| oxidoreductase [Zea mays]
isotig01407	isogroup00051	3547	gb|ACN27562.1|	unknown [Zea mays] gb|AFW63032.1| oxidoreductase [Zea mays]
isotig01408	isogroup00051	3544	gb|ACN27562.1|	unknown [Zea mays] gb|AFW63032.1| oxidoreductase [Zea mays]
isotig01409	isogroup00051	3535	gb|ACN27562.1|	unknown [Zea mays] gb|AFW63032.1| oxidoreductase [Zea mays]
isotig01410	isogroup00051	3532	gb|ACN27562.1|	unknown [Zea mays] gb|AFW63032.1| oxidoreductase [Zea mays]
isotig01411	isogroup00051	3526	gb|ACN27562.1|	unknown [Zea mays] gb|AFW63032.1| oxidoreductase [Zea mays]
isotig01412	isogroup00051	3553	gb|ACN27562.1|	unknown [Zea mays] gb|AFW63032.1| oxidoreductase [Zea mays]
isotig01413	isogroup00051	3550	gb|ACN27562.1|	unknown [Zea mays] gb|AFW63032.1| oxidoreductase [Zea mays]
isotig01414	isogroup00051	3532	gb|ACN27562.1|	unknown [Zea mays] gb|AFW63032.1| oxidoreductase [Zea mays]
isotig01415	isogroup00051	3529	gb|ACN27562.1|	unknown [Zea mays] gb|AFW63032.1| oxidoreductase [Zea mays]
isotig01416	isogroup00051	3003	gb|ACN27562.1|	unknown [Zea mays] gb|AFW63032.1| oxidoreductase [Zea mays]
isotig01417	isogroup00051	3009	gb|ACN27562.1|	unknown [Zea mays] gb|AFW63032.1| oxidoreductase [Zea mays]
isotig01418	isogroup00051	2988	gb|ACN27562.1|	unknown [Zea mays] gb|AFW63032.1| oxidoreductase [Zea mays]
isotig01419	isogroup00051	2592	gb|ACN27562.1|	unknown [Zea mays] gb|AFW63032.1| oxidoreductase [Zea mays]
isotig01420	isogroup00051	2598	gb|ACN27562.1|	unknown [Zea mays] gb|AFW63032.1| oxidoreductase [Zea mays]
isotig01421	isogroup00051	2595	gb|ACN27562.1|	unknown [Zea mays] gb|AFW63032.1| oxidoreductase [Zea mays]
isotig01422	isogroup00051	2589	gb|ACN27562.1|	unknown [Zea mays] gb|AFW63032.1| oxidoreductase [Zea mays]
isotig01423	isogroup00051	2577	gb|ACN27562.1|	unknown [Zea mays] gb|AFW63032.1| oxidoreductase [Zea mays]
isotig01424	isogroup00051	2592	gb|ACN27562.1|	unknown [Zea mays] gb|AFW63032.1| oxidoreductase [Zea mays]
isotig01425	isogroup00051	2601	gb|ACN27562.1|	unknown [Zea mays] gb|AFW63032.1| oxidoreductase [Zea mays]
isotig01426	isogroup00051	2595	gb|ACN27562.1|	unknown [Zea mays] gb|AFW63032.1| oxidoreductase [Zea mays]
isotig01427	isogroup00051	2592	gb|ACN27562.1|	unknown [Zea mays] gb|AFW63032.1| oxidoreductase [Zea mays]
isotig01428	isogroup00051	2580	gb|ACN27562.1|	unknown [Zea mays] gb|AFW63032.1| oxidoreductase [Zea mays]
isotig01429	isogroup00051	2598	gb|ACN27562.1|	unknown [Zea mays] gb|AFW63032.1| oxidoreductase [Zea mays]
isotig01430	isogroup00051	2598	gb|ACN27562.1|	unknown [Zea mays] gb|AFW63032.1| oxidoreductase [Zea mays]
isotig01431	isogroup00051	2595	gb|ACN27562.1|	unknown [Zea mays] gb|AFW63032.1| oxidoreductase [Zea mays]
isotig01432	isogroup00051	2574	gb|ACN27562.1|	unknown [Zea mays] gb|AFW63032.1| oxidoreductase [Zea mays]
isotig01433	isogroup00051	2589	gb|ACN27562.1|	unknown [Zea mays] gb|AFW63032.1| oxidoreductase [Zea mays]
isotig01434	isogroup00051	2598	gb|ACN27562.1|	unknown [Zea mays] gb|AFW63032.1| oxidoreductase [Zea mays]
isotig01435	isogroup00051	2577	gb|ACN27562.1|	unknown [Zea mays] gb|AFW63032.1| oxidoreductase [Zea mays]
isotig01436	isogroup00051	2604	gb|ACN27562.1|	unknown [Zea mays] gb|AFW63032.1| oxidoreductase [Zea mays]
isotig01437	isogroup00051	2601	gb|ACN27562.1|	unknown [Zea mays] gb|AFW63032.1| oxidoreductase [Zea mays]
isotig01438	isogroup00051	2577	gb|ACN27562.1|	unknown [Zea mays] gb|AFW63032.1| oxidoreductase [Zea mays]
isotig01439	isogroup00051	2595	gb|ACN27562.1|	unknown [Zea mays] gb|AFW63032.1| oxidoreductase [Zea mays]
isotig01440	isogroup00051	2595	gb|ACN27562.1|	unknown [Zea mays] gb|AFW63032.1| oxidoreductase [Zea mays]
isotig01441	isogroup00051	2592	gb|ACN27562.1|	unknown [Zea mays] gb|AFW63032.1| oxidoreductase [Zea mays]
isotig01442	isogroup00051	2583	gb|ACN27562.1|	unknown [Zea mays] gb|AFW63032.1| oxidoreductase [Zea mays]
isotig01443	isogroup00051	2580	gb|ACN27562.1|	unknown [Zea mays] gb|AFW63032.1| oxidoreductase [Zea mays]
isotig01444	isogroup00051	2574	gb|ACN27562.1|	unknown [Zea mays] gb|AFW63032.1| oxidoreductase [Zea mays]
isotig01445	isogroup00051	2601	gb|ACN27562.1|	unknown [Zea mays] gb|AFW63032.1| oxidoreductase [Zea mays]
isotig01446	isogroup00051	2598	gb|ACN27562.1|	unknown [Zea mays] gb|AFW63032.1| oxidoreductase [Zea mays]
isotig01447	isogroup00051	2580	gb|ACN27562.1|	unknown [Zea mays] gb|AFW63032.1| oxidoreductase [Zea mays]
isotig01448	isogroup00051	2577	gb|ACN27562.1|	unknown [Zea mays] gb|AFW63032.1| oxidoreductase [Zea mays]
isotig01449	isogroup00051	2604	gb|ACN27562.1|	unknown [Zea mays] gb|AFW63032.1| oxidoreductase [Zea mays]
isotig01450	isogroup00051	2601	gb|ACN27562.1|	unknown [Zea mays] gb|AFW63032.1| oxidoreductase [Zea mays]
isotig01451	isogroup00051	2051	ref|NP_001148058.1|	oxidoreductase [Zea mays] gb|ACG29606.1| oxidoreductase [Zea mays]
isotig01452	isogroup00051	2057	ref|NP_001148058.1|	oxidoreductase [Zea mays] gb|ACG29606.1| oxidoreductase [Zea mays]
isotig01453	isogroup00051	2036	ref|NP_001148058.1|	oxidoreductase [Zea mays] gb|ACG29606.1| oxidoreductase [Zea mays]
isotig01454	isogroup00052	4002	ref|XP_002444539.1|	hypothetical protein SORBIDRAFT_07g023520 [Sorghum bicolor] gb|EES14034.1| hypothetical protein SORBIDRAFT_07g023520 [Sorghum bicolor]
isotig01455	isogroup00052	3998	ref|XP_002444539.1|	hypothetical protein SORBIDRAFT_07g023520 [Sorghum bicolor] gb|EES14034.1| hypothetical protein SORBIDRAFT_07g023520 [Sorghum bicolor]
isotig01456	isogroup00052	4004	ref|XP_002444539.1|	hypothetical protein SORBIDRAFT_07g023520 [Sorghum bicolor] gb|EES14034.1| hypothetical protein SORBIDRAFT_07g023520 [Sorghum bicolor]
isotig01457	isogroup00052	4000	ref|XP_002444539.1|	hypothetical protein SORBIDRAFT_07g023520 [Sorghum bicolor] gb|EES14034.1| hypothetical protein SORBIDRAFT_07g023520 [Sorghum bicolor]
isotig01458	isogroup00052	4003	ref|XP_002444539.1|	hypothetical protein SORBIDRAFT_07g023520 [Sorghum bicolor] gb|EES14034.1| hypothetical protein SORBIDRAFT_07g023520 [Sorghum bicolor]
isotig01459	isogroup00052	3999	ref|XP_002444539.1|	hypothetical protein SORBIDRAFT_07g023520 [Sorghum bicolor] gb|EES14034.1| hypothetical protein SORBIDRAFT_07g023520 [Sorghum bicolor]
isotig01460	isogroup00052	4001	ref|XP_002444539.1|	hypothetical protein SORBIDRAFT_07g023520 [Sorghum bicolor] gb|EES14034.1| hypothetical protein SORBIDRAFT_07g023520 [Sorghum bicolor]
isotig01461	isogroup00052	3997	ref|XP_002444539.1|	hypothetical protein SORBIDRAFT_07g023520 [Sorghum bicolor] gb|EES14034.1| hypothetical protein SORBIDRAFT_07g023520 [Sorghum bicolor]
isotig01462	isogroup00052	4005	ref|XP_002444539.1|	hypothetical protein SORBIDRAFT_07g023520 [Sorghum bicolor] gb|EES14034.1| hypothetical protein SORBIDRAFT_07g023520 [Sorghum bicolor]
isotig01463	isogroup00052	4001	ref|XP_002444539.1|	hypothetical protein SORBIDRAFT_07g023520 [Sorghum bicolor] gb|EES14034.1| hypothetical protein SORBIDRAFT_07g023520 [Sorghum bicolor]
isotig01464	isogroup00052	4003	ref|XP_002444539.1|	hypothetical protein SORBIDRAFT_07g023520 [Sorghum bicolor] gb|EES14034.1| hypothetical protein SORBIDRAFT_07g023520 [Sorghum bicolor]
isotig01465	isogroup00052	3999	ref|XP_002444539.1|	hypothetical protein SORBIDRAFT_07g023520 [Sorghum bicolor] gb|EES14034.1| hypothetical protein SORBIDRAFT_07g023520 [Sorghum bicolor]
isotig01466	isogroup00052	4001	ref|XP_002444539.1|	hypothetical protein SORBIDRAFT_07g023520 [Sorghum bicolor] gb|EES14034.1| hypothetical protein SORBIDRAFT_07g023520 [Sorghum bicolor]
isotig01467	isogroup00052	3997	ref|XP_002444539.1|	hypothetical protein SORBIDRAFT_07g023520 [Sorghum bicolor] gb|EES14034.1| hypothetical protein SORBIDRAFT_07g023520 [Sorghum bicolor]
isotig01468	isogroup00052	4004	ref|XP_002444539.1|	hypothetical protein SORBIDRAFT_07g023520 [Sorghum bicolor] gb|EES14034.1| hypothetical protein SORBIDRAFT_07g023520 [Sorghum bicolor]
isotig01469	isogroup00052	4000	ref|XP_002444539.1|	hypothetical protein SORBIDRAFT_07g023520 [Sorghum bicolor] gb|EES14034.1| hypothetical protein SORBIDRAFT_07g023520 [Sorghum bicolor]
isotig01470	isogroup00052	3939	ref|XP_002444539.1|	hypothetical protein SORBIDRAFT_07g023520 [Sorghum bicolor] gb|EES14034.1| hypothetical protein SORBIDRAFT_07g023520 [Sorghum bicolor]
isotig01471	isogroup00052	3935	ref|XP_002444539.1|	hypothetical protein SORBIDRAFT_07g023520 [Sorghum bicolor] gb|EES14034.1| hypothetical protein SORBIDRAFT_07g023520 [Sorghum bicolor]
isotig01472	isogroup00052	3940	ref|XP_002444539.1|	hypothetical protein SORBIDRAFT_07g023520 [Sorghum bicolor] gb|EES14034.1| hypothetical protein SORBIDRAFT_07g023520 [Sorghum bicolor]
isotig01473	isogroup00052	3936	ref|XP_002444539.1|	hypothetical protein SORBIDRAFT_07g023520 [Sorghum bicolor] gb|EES14034.1| hypothetical protein SORBIDRAFT_07g023520 [Sorghum bicolor]
isotig01474	isogroup00052	3938	ref|XP_002444539.1|	hypothetical protein SORBIDRAFT_07g023520 [Sorghum bicolor] gb|EES14034.1| hypothetical protein SORBIDRAFT_07g023520 [Sorghum bicolor]
isotig01475	isogroup00052	3934	ref|XP_002444539.1|	hypothetical protein SORBIDRAFT_07g023520 [Sorghum bicolor] gb|EES14034.1| hypothetical protein SORBIDRAFT_07g023520 [Sorghum bicolor]
isotig01476	isogroup00052	1524	ref|NP_001146251.1|	hypothetical protein precursor [Zea mays] gb|ACL53571.1| unknown [Zea mays] tpg|DAA48526.1| TPA: hypothetical protein ZEAMMB73_035710 [Zea mays]
isotig01477	isogroup00052	1527	ref|NP_001146251.1|	hypothetical protein precursor [Zea mays] gb|ACL53571.1| unknown [Zea mays] tpg|DAA48526.1| TPA: hypothetical protein ZEAMMB73_035710 [Zea mays]
isotig01478	isogroup00052	1450	ref|NP_001146251.1|	hypothetical protein precursor [Zea mays] gb|ACL53571.1| unknown [Zea mays] tpg|DAA48526.1| TPA: hypothetical protein ZEAMMB73_035710 [Zea mays]
isotig01479	isogroup00052	1435	ref|NP_001146251.1|	hypothetical protein precursor [Zea mays] gb|ACL53571.1| unknown [Zea mays] tpg|DAA48526.1| TPA: hypothetical protein ZEAMMB73_035710 [Zea mays]
isotig01480	isogroup00052	1527	ref|NP_001146251.1|	hypothetical protein precursor [Zea mays] gb|ACL53571.1| unknown [Zea mays] tpg|DAA48526.1| TPA: hypothetical protein ZEAMMB73_035710 [Zea mays]
isotig01481	isogroup00052	1524	ref|NP_001146251.1|	hypothetical protein precursor [Zea mays] gb|ACL53571.1| unknown [Zea mays] tpg|DAA48526.1| TPA: hypothetical protein ZEAMMB73_035710 [Zea mays]
isotig01482	isogroup00052	1453	ref|NP_001146251.1|	hypothetical protein precursor [Zea mays] gb|ACL53571.1| unknown [Zea mays] tpg|DAA48526.1| TPA: hypothetical protein ZEAMMB73_035710 [Zea mays]
isotig01483	isogroup00052	1438	ref|NP_001146251.1|	hypothetical protein precursor [Zea mays] gb|ACL53571.1| unknown [Zea mays] tpg|DAA48526.1| TPA: hypothetical protein ZEAMMB73_035710 [Zea mays]
isotig01484	isogroup00052	1530	ref|NP_001146251.1|	hypothetical protein precursor [Zea mays] gb|ACL53571.1| unknown [Zea mays] tpg|DAA48526.1| TPA: hypothetical protein ZEAMMB73_035710 [Zea mays]
isotig01485	isogroup00052	1527	ref|NP_001146251.1|	hypothetical protein precursor [Zea mays] gb|ACL53571.1| unknown [Zea mays] tpg|DAA48526.1| TPA: hypothetical protein ZEAMMB73_035710 [Zea mays]
isotig01486	isogroup00052	1524	ref|NP_001146251.1|	hypothetical protein precursor [Zea mays] gb|ACL53571.1| unknown [Zea mays] tpg|DAA48526.1| TPA: hypothetical protein ZEAMMB73_035710 [Zea mays]
isotig01487	isogroup00052	1453	ref|NP_001146251.1|	hypothetical protein precursor [Zea mays] gb|ACL53571.1| unknown [Zea mays] tpg|DAA48526.1| TPA: hypothetical protein ZEAMMB73_035710 [Zea mays]
isotig01488	isogroup00052	1450	ref|NP_001146251.1|	hypothetical protein precursor [Zea mays] gb|ACL53571.1| unknown [Zea mays] tpg|DAA48526.1| TPA: hypothetical protein ZEAMMB73_035710 [Zea mays]
isotig01489	isogroup00052	1438	ref|NP_001146251.1|	hypothetical protein precursor [Zea mays] gb|ACL53571.1| unknown [Zea mays] tpg|DAA48526.1| TPA: hypothetical protein ZEAMMB73_035710 [Zea mays]
isotig01490	isogroup00052	1435	ref|NP_001146251.1|	hypothetical protein precursor [Zea mays] gb|ACL53571.1| unknown [Zea mays] tpg|DAA48526.1| TPA: hypothetical protein ZEAMMB73_035710 [Zea mays]
isotig01491	isogroup00052	1527	ref|NP_001146251.1|	hypothetical protein precursor [Zea mays] gb|ACL53571.1| unknown [Zea mays] tpg|DAA48526.1| TPA: hypothetical protein ZEAMMB73_035710 [Zea mays]
isotig01492	isogroup00052	1456	ref|NP_001146251.1|	hypothetical protein precursor [Zea mays] gb|ACL53571.1| unknown [Zea mays] tpg|DAA48526.1| TPA: hypothetical protein ZEAMMB73_035710 [Zea mays]
isotig01493	isogroup00052	1453	ref|NP_001146251.1|	hypothetical protein precursor [Zea mays] gb|ACL53571.1| unknown [Zea mays] tpg|DAA48526.1| TPA: hypothetical protein ZEAMMB73_035710 [Zea mays]
isotig01494	isogroup00052	1441	ref|NP_001146251.1|	hypothetical protein precursor [Zea mays] gb|ACL53571.1| unknown [Zea mays] tpg|DAA48526.1| TPA: hypothetical protein ZEAMMB73_035710 [Zea mays]
isotig01495	isogroup00052	1438	ref|NP_001146251.1|	hypothetical protein precursor [Zea mays] gb|ACL53571.1| unknown [Zea mays] tpg|DAA48526.1| TPA: hypothetical protein ZEAMMB73_035710 [Zea mays]
isotig01496	isogroup00052	1450	ref|NP_001146251.1|	hypothetical protein precursor [Zea mays] gb|ACL53571.1| unknown [Zea mays] tpg|DAA48526.1| TPA: hypothetical protein ZEAMMB73_035710 [Zea mays]
isotig01497	isogroup00052	1435	ref|NP_001146251.1|	hypothetical protein precursor [Zea mays] gb|ACL53571.1| unknown [Zea mays] tpg|DAA48526.1| TPA: hypothetical protein ZEAMMB73_035710 [Zea mays]
isotig01498	isogroup00052	1461	ref|NP_001146251.1|	hypothetical protein precursor [Zea mays] gb|ACL53571.1| unknown [Zea mays] tpg|DAA48526.1| TPA: hypothetical protein ZEAMMB73_035710 [Zea mays]
isotig01499	isogroup00052	1470	ref|NP_001146251.1|	hypothetical protein precursor [Zea mays] gb|ACL53571.1| unknown [Zea mays] tpg|DAA48526.1| TPA: hypothetical protein ZEAMMB73_035710 [Zea mays]
isotig01500	isogroup00052	1453	ref|NP_001146251.1|	hypothetical protein precursor [Zea mays] gb|ACL53571.1| unknown [Zea mays] tpg|DAA48526.1| TPA: hypothetical protein ZEAMMB73_035710 [Zea mays]
isotig01501	isogroup00052	1438	ref|NP_001146251.1|	hypothetical protein precursor [Zea mays] gb|ACL53571.1| unknown [Zea mays] tpg|DAA48526.1| TPA: hypothetical protein ZEAMMB73_035710 [Zea mays]
isotig01502	isogroup00052	1473	ref|NP_001146251.1|	hypothetical protein precursor [Zea mays] gb|ACL53571.1| unknown [Zea mays] tpg|DAA48526.1| TPA: hypothetical protein ZEAMMB73_035710 [Zea mays]
isotig01503	isogroup00052	1387	ref|NP_001146251.1|	hypothetical protein precursor [Zea mays] gb|ACL53571.1| unknown [Zea mays] tpg|DAA48526.1| TPA: hypothetical protein ZEAMMB73_035710 [Zea mays]
isotig01504	isogroup00052	1372	ref|NP_001146251.1|	hypothetical protein precursor [Zea mays] gb|ACL53571.1| unknown [Zea mays] tpg|DAA48526.1| TPA: hypothetical protein ZEAMMB73_035710 [Zea mays]
isotig01505	isogroup00052	1464	ref|NP_001146251.1|	hypothetical protein precursor [Zea mays] gb|ACL53571.1| unknown [Zea mays] tpg|DAA48526.1| TPA: hypothetical protein ZEAMMB73_035710 [Zea mays]
isotig01506	isogroup00052	1461	ref|NP_001146251.1|	hypothetical protein precursor [Zea mays] gb|ACL53571.1| unknown [Zea mays] tpg|DAA48526.1| TPA: hypothetical protein ZEAMMB73_035710 [Zea mays]
isotig01507	isogroup00052	1473	ref|NP_001146251.1|	hypothetical protein precursor [Zea mays] gb|ACL53571.1| unknown [Zea mays] tpg|DAA48526.1| TPA: hypothetical protein ZEAMMB73_035710 [Zea mays]
isotig01508	isogroup00052	1470	ref|NP_001146251.1|	hypothetical protein precursor [Zea mays] gb|ACL53571.1| unknown [Zea mays] tpg|DAA48526.1| TPA: hypothetical protein ZEAMMB73_035710 [Zea mays]
isotig01509	isogroup00052	1476	ref|NP_001146251.1|	hypothetical protein precursor [Zea mays] gb|ACL53571.1| unknown [Zea mays] tpg|DAA48526.1| TPA: hypothetical protein ZEAMMB73_035710 [Zea mays]
isotig01510	isogroup00052	1473	ref|NP_001146251.1|	hypothetical protein precursor [Zea mays] gb|ACL53571.1| unknown [Zea mays] tpg|DAA48526.1| TPA: hypothetical protein ZEAMMB73_035710 [Zea mays]
isotig01511	isogroup00052	1470	ref|NP_001146251.1|	hypothetical protein precursor [Zea mays] gb|ACL53571.1| unknown [Zea mays] tpg|DAA48526.1| TPA: hypothetical protein ZEAMMB73_035710 [Zea mays]
isotig01512	isogroup00052	1390	ref|NP_001146251.1|	hypothetical protein precursor [Zea mays] gb|ACL53571.1| unknown [Zea mays] tpg|DAA48526.1| TPA: hypothetical protein ZEAMMB73_035710 [Zea mays]
isotig01513	isogroup00052	1387	ref|NP_001146251.1|	hypothetical protein precursor [Zea mays] gb|ACL53571.1| unknown [Zea mays] tpg|DAA48526.1| TPA: hypothetical protein ZEAMMB73_035710 [Zea mays]
isotig01514	isogroup00052	1375	ref|NP_001146251.1|	hypothetical protein precursor [Zea mays] gb|ACL53571.1| unknown [Zea mays] tpg|DAA48526.1| TPA: hypothetical protein ZEAMMB73_035710 [Zea mays]
isotig01515	isogroup00052	1372	ref|NP_001146251.1|	hypothetical protein precursor [Zea mays] gb|ACL53571.1| unknown [Zea mays] tpg|DAA48526.1| TPA: hypothetical protein ZEAMMB73_035710 [Zea mays]
isotig01516	isogroup00052	1473	ref|NP_001146251.1|	hypothetical protein precursor [Zea mays] gb|ACL53571.1| unknown [Zea mays] tpg|DAA48526.1| TPA: hypothetical protein ZEAMMB73_035710 [Zea mays]
isotig01517	isogroup00052	1407	ref|NP_001146251.1|	hypothetical protein precursor [Zea mays] gb|ACL53571.1| unknown [Zea mays] tpg|DAA48526.1| TPA: hypothetical protein ZEAMMB73_035710 [Zea mays]
isotig01518	isogroup00052	1410	ref|NP_001146251.1|	hypothetical protein precursor [Zea mays] gb|ACL53571.1| unknown [Zea mays] tpg|DAA48526.1| TPA: hypothetical protein ZEAMMB73_035710 [Zea mays]
isotig01519	isogroup00052	1407	ref|NP_001146251.1|	hypothetical protein precursor [Zea mays] gb|ACL53571.1| unknown [Zea mays] tpg|DAA48526.1| TPA: hypothetical protein ZEAMMB73_035710 [Zea mays]
isotig01520	isogroup00053	2243	ref|XP_002463199.1|	hypothetical protein SORBIDRAFT_02g039660 [Sorghum bicolor] gb|EER99720.1| hypothetical protein SORBIDRAFT_02g039660 [Sorghum bicolor]
isotig01521	isogroup00053	2248	ref|NP_001150866.1|	phospho-2-dehydro-3-deoxyheptonate aldolase 1 [Zea mays] gb|ACG40701.1| phospho-2-dehydro-3-deoxyheptonate aldolase 1 [Zea mays] tpg|DAA63663.1| TPA: phospho-2-dehydro-3-deoxyheptonate aldolase 1 [Zea mays]
isotig01522	isogroup00053	2207	gb|EAZ04751.1|	hypothetical protein OsI_26913 [Oryza sativa Indica Group]
isotig01523	isogroup00053	2158	gb|EAZ04751.1|	hypothetical protein OsI_26913 [Oryza sativa Indica Group]
isotig01524	isogroup00053	2163	ref|NP_001150866.1|	phospho-2-dehydro-3-deoxyheptonate aldolase 1 [Zea mays] gb|ACG40701.1| phospho-2-dehydro-3-deoxyheptonate aldolase 1 [Zea mays] tpg|DAA63663.1| TPA: phospho-2-dehydro-3-deoxyheptonate aldolase 1 [Zea mays]
isotig01525	isogroup00053	2114	ref|XP_002463199.1|	hypothetical protein SORBIDRAFT_02g039660 [Sorghum bicolor] gb|EER99720.1| hypothetical protein SORBIDRAFT_02g039660 [Sorghum bicolor]
isotig01526	isogroup00053	2119	ref|NP_001150866.1|	phospho-2-dehydro-3-deoxyheptonate aldolase 1 [Zea mays] gb|ACG40701.1| phospho-2-dehydro-3-deoxyheptonate aldolase 1 [Zea mays] tpg|DAA63663.1| TPA: phospho-2-dehydro-3-deoxyheptonate aldolase 1 [Zea mays]
isotig01527	isogroup00053	2122	gb|EAZ04751.1|	hypothetical protein OsI_26913 [Oryza sativa Indica Group]
isotig01528	isogroup00053	2078	gb|EAZ04751.1|	hypothetical protein OsI_26913 [Oryza sativa Indica Group]
isotig01529	isogroup00053	2064	gb|EAZ04751.1|	hypothetical protein OsI_26913 [Oryza sativa Indica Group]
isotig01530	isogroup00053	2098	ref|XP_003562680.1|	PREDICTED: phospho-2-dehydro-3-deoxyheptonate aldolase 2, chloroplastic-like [Brachypodium distachyon]
isotig01531	isogroup00053	2140	ref|XP_002463199.1|	hypothetical protein SORBIDRAFT_02g039660 [Sorghum bicolor] gb|EER99720.1| hypothetical protein SORBIDRAFT_02g039660 [Sorghum bicolor]
isotig01532	isogroup00053	2145	ref|NP_001150866.1|	phospho-2-dehydro-3-deoxyheptonate aldolase 1 [Zea mays] gb|ACG40701.1| phospho-2-dehydro-3-deoxyheptonate aldolase 1 [Zea mays] tpg|DAA63663.1| TPA: phospho-2-dehydro-3-deoxyheptonate aldolase 1 [Zea mays]
isotig01533	isogroup00053	2029	gb|EAZ04751.1|	hypothetical protein OsI_26913 [Oryza sativa Indica Group]
isotig01534	isogroup00053	2034	ref|NP_001150866.1|	phospho-2-dehydro-3-deoxyheptonate aldolase 1 [Zea mays] gb|ACG40701.1| phospho-2-dehydro-3-deoxyheptonate aldolase 1 [Zea mays] tpg|DAA63663.1| TPA: phospho-2-dehydro-3-deoxyheptonate aldolase 1 [Zea mays]
isotig01535	isogroup00053	2104	gb|EAZ04751.1|	hypothetical protein OsI_26913 [Oryza sativa Indica Group]
isotig01536	isogroup00053	1993	gb|EAZ04751.1|	hypothetical protein OsI_26913 [Oryza sativa Indica Group]
isotig01537	isogroup00053	1979	tpg|DAA41496.1|	TPA: hypothetical protein ZEAMMB73_099810 [Zea mays]
isotig01538	isogroup00053	2013	ref|NP_001060314.1|	Os07g0622200 [Oryza sativa Japonica Group] dbj|BAC10194.1| putative phospho-2-dehydro-3-deoxyheptonate aldolase 1, chloroplast precursor [Oryza sativa Japonica Group] dbj|BAF22228.1| Os07g0622200 [Oryza sativa Japonica Group] gb|EAZ40701.1| hypothetical protein OsJ_25169 [Oryza sativa Japonica Group] dbj|BAG97334.1| unnamed protein product [Oryza sativa Japonica Group]
isotig01539	isogroup00053	2055	gb|EAZ04751.1|	hypothetical protein OsI_26913 [Oryza sativa Indica Group]
isotig01540	isogroup00053	2060	ref|NP_001150866.1|	phospho-2-dehydro-3-deoxyheptonate aldolase 1 [Zea mays] gb|ACG40701.1| phospho-2-dehydro-3-deoxyheptonate aldolase 1 [Zea mays] tpg|DAA63663.1| TPA: phospho-2-dehydro-3-deoxyheptonate aldolase 1 [Zea mays]
isotig01541	isogroup00053	1935	gb|EAZ04751.1|	hypothetical protein OsI_26913 [Oryza sativa Indica Group]
isotig01542	isogroup00053	1969	ref|XP_003562680.1|	PREDICTED: phospho-2-dehydro-3-deoxyheptonate aldolase 2, chloroplastic-like [Brachypodium distachyon]
isotig01543	isogroup00053	2019	gb|EAZ04751.1|	hypothetical protein OsI_26913 [Oryza sativa Indica Group]
isotig01544	isogroup00053	1961	gb|EAZ04751.1|	hypothetical protein OsI_26913 [Oryza sativa Indica Group]
isotig01545	isogroup00053	1995	ref|XP_003562680.1|	PREDICTED: phospho-2-dehydro-3-deoxyheptonate aldolase 2, chloroplastic-like [Brachypodium distachyon]
isotig01546	isogroup00053	1850	tpg|DAA41496.1|	TPA: hypothetical protein ZEAMMB73_099810 [Zea mays]
isotig01547	isogroup00053	1884	ref|NP_001060314.1|	Os07g0622200 [Oryza sativa Japonica Group] dbj|BAC10194.1| putative phospho-2-dehydro-3-deoxyheptonate aldolase 1, chloroplast precursor [Oryza sativa Japonica Group] dbj|BAF22228.1| Os07g0622200 [Oryza sativa Japonica Group] gb|EAZ40701.1| hypothetical protein OsJ_25169 [Oryza sativa Japonica Group] dbj|BAG97334.1| unnamed protein product [Oryza sativa Japonica Group]
isotig01548	isogroup00053	1881	ref|XP_002463199.1|	hypothetical protein SORBIDRAFT_02g039660 [Sorghum bicolor] gb|EER99720.1| hypothetical protein SORBIDRAFT_02g039660 [Sorghum bicolor]
isotig01549	isogroup00053	1886	ref|NP_001150866.1|	phospho-2-dehydro-3-deoxyheptonate aldolase 1 [Zea mays] gb|ACG40701.1| phospho-2-dehydro-3-deoxyheptonate aldolase 1 [Zea mays] tpg|DAA63663.1| TPA: phospho-2-dehydro-3-deoxyheptonate aldolase 1 [Zea mays]
isotig01550	isogroup00053	1876	tpg|DAA41496.1|	TPA: hypothetical protein ZEAMMB73_099810 [Zea mays]
isotig01551	isogroup00053	1910	ref|NP_001060314.1|	Os07g0622200 [Oryza sativa Japonica Group] dbj|BAC10194.1| putative phospho-2-dehydro-3-deoxyheptonate aldolase 1, chloroplast precursor [Oryza sativa Japonica Group] dbj|BAF22228.1| Os07g0622200 [Oryza sativa Japonica Group] gb|EAZ40701.1| hypothetical protein OsJ_25169 [Oryza sativa Japonica Group] dbj|BAG97334.1| unnamed protein product [Oryza sativa Japonica Group]
isotig01552	isogroup00053	1845	gb|EAZ04751.1|	hypothetical protein OsI_26913 [Oryza sativa Indica Group]
isotig01553	isogroup00053	1796	gb|EAZ04751.1|	hypothetical protein OsI_26913 [Oryza sativa Indica Group]
isotig01554	isogroup00053	1801	ref|NP_001150866.1|	phospho-2-dehydro-3-deoxyheptonate aldolase 1 [Zea mays] gb|ACG40701.1| phospho-2-dehydro-3-deoxyheptonate aldolase 1 [Zea mays] tpg|DAA63663.1| TPA: phospho-2-dehydro-3-deoxyheptonate aldolase 1 [Zea mays]
isotig01555	isogroup00053	1760	gb|EAZ04751.1|	hypothetical protein OsI_26913 [Oryza sativa Indica Group]
isotig01556	isogroup00053	1702	gb|EAZ04751.1|	hypothetical protein OsI_26913 [Oryza sativa Indica Group]
isotig01557	isogroup00053	1736	ref|XP_003562680.1|	PREDICTED: phospho-2-dehydro-3-deoxyheptonate aldolase 2, chloroplastic-like [Brachypodium distachyon]
isotig01558	isogroup00053	1617	tpg|DAA41496.1|	TPA: hypothetical protein ZEAMMB73_099810 [Zea mays]
isotig01559	isogroup00053	1651	gb|EAZ04751.1|	hypothetical protein OsI_26913 [Oryza sativa Indica Group]
isotig01560	isogroup00054	8200	ref|XP_002447137.1|	hypothetical protein SORBIDRAFT_06g029230 [Sorghum bicolor] gb|EES11465.1| hypothetical protein SORBIDRAFT_06g029230 [Sorghum bicolor]
isotig01561	isogroup00054	8191	ref|XP_002447137.1|	hypothetical protein SORBIDRAFT_06g029230 [Sorghum bicolor] gb|EES11465.1| hypothetical protein SORBIDRAFT_06g029230 [Sorghum bicolor]
isotig01562	isogroup00054	7438	ref|XP_002447137.1|	hypothetical protein SORBIDRAFT_06g029230 [Sorghum bicolor] gb|EES11465.1| hypothetical protein SORBIDRAFT_06g029230 [Sorghum bicolor]
isotig01563	isogroup00054	7429	ref|XP_002447137.1|	hypothetical protein SORBIDRAFT_06g029230 [Sorghum bicolor] gb|EES11465.1| hypothetical protein SORBIDRAFT_06g029230 [Sorghum bicolor]
isotig01564	isogroup00054	7396	ref|XP_002447137.1|	hypothetical protein SORBIDRAFT_06g029230 [Sorghum bicolor] gb|EES11465.1| hypothetical protein SORBIDRAFT_06g029230 [Sorghum bicolor]
isotig01565	isogroup00054	7387	ref|XP_002447137.1|	hypothetical protein SORBIDRAFT_06g029230 [Sorghum bicolor] gb|EES11465.1| hypothetical protein SORBIDRAFT_06g029230 [Sorghum bicolor]
isotig01566	isogroup00054	5939	emb|CAD45027.1|	NBS-LRR disease resistance protein homologue [Hordeum vulgare]
isotig01567	isogroup00054	5930	gb|EAZ38231.1|	hypothetical protein OsJ_22606 [Oryza sativa Japonica Group]
isotig01568	isogroup00054	5177	emb|CAD45027.1|	NBS-LRR disease resistance protein homologue [Hordeum vulgare]
isotig01569	isogroup00054	5168	gb|EAZ38231.1|	hypothetical protein OsJ_22606 [Oryza sativa Japonica Group]
isotig01570	isogroup00054	5135	emb|CAD45027.1|	NBS-LRR disease resistance protein homologue [Hordeum vulgare]
isotig01571	isogroup00054	5126	gb|EAZ38231.1|	hypothetical protein OsJ_22606 [Oryza sativa Japonica Group]
isotig01572	isogroup00054	4800	dbj|BAJ86702.1|	predicted protein [Hordeum vulgare subsp. vulgare]
isotig01573	isogroup00054	4791	dbj|BAJ86702.1|	predicted protein [Hordeum vulgare subsp. vulgare]
isotig01574	isogroup00054	4750	dbj|BAJ86702.1|	predicted protein [Hordeum vulgare subsp. vulgare]
isotig01575	isogroup00054	4741	dbj|BAJ86702.1|	predicted protein [Hordeum vulgare subsp. vulgare]
isotig01576	isogroup00054	4038	dbj|BAJ86702.1|	predicted protein [Hordeum vulgare subsp. vulgare]
isotig01577	isogroup00054	4029	dbj|BAJ86702.1|	predicted protein [Hordeum vulgare subsp. vulgare]
isotig01578	isogroup00054	3996	dbj|BAJ86702.1|	predicted protein [Hordeum vulgare subsp. vulgare]
isotig01579	isogroup00054	3987	dbj|BAJ86702.1|	predicted protein [Hordeum vulgare subsp. vulgare]
isotig01580	isogroup00054	3988	dbj|BAJ86702.1|	predicted protein [Hordeum vulgare subsp. vulgare]
isotig01581	isogroup00054	3979	dbj|BAJ86702.1|	predicted protein [Hordeum vulgare subsp. vulgare]
isotig01582	isogroup00054	3946	dbj|BAJ86702.1|	predicted protein [Hordeum vulgare subsp. vulgare]
isotig01583	isogroup00054	3937	dbj|BAJ86702.1|	predicted protein [Hordeum vulgare subsp. vulgare]
isotig01584	isogroup00054	2817	ref|XP_002447137.1|	hypothetical protein SORBIDRAFT_06g029230 [Sorghum bicolor] gb|EES11465.1| hypothetical protein SORBIDRAFT_06g029230 [Sorghum bicolor]
isotig01585	isogroup00054	933	ref|XP_002447137.1|	hypothetical protein SORBIDRAFT_06g029230 [Sorghum bicolor] gb|EES11465.1| hypothetical protein SORBIDRAFT_06g029230 [Sorghum bicolor]
isotig01586	isogroup00054	837
isotig01587	isogroup00054	739
isotig01588	isogroup00054	556	gb|EAZ38231.1|	hypothetical protein OsJ_22606 [Oryza sativa Japonica Group]
isotig01589	isogroup00057	1646	dbj|BAK06031.1|	predicted protein [Hordeum vulgare subsp. vulgare]
isotig01590	isogroup00057	1646	dbj|BAK06031.1|	predicted protein [Hordeum vulgare subsp. vulgare]
isotig01591	isogroup00057	1608	dbj|BAK06031.1|	predicted protein [Hordeum vulgare subsp. vulgare]
isotig01592	isogroup00057	1608	dbj|BAK06031.1|	predicted protein [Hordeum vulgare subsp. vulgare]
isotig01593	isogroup00057	1557	ref|XP_002455891.1|	hypothetical protein SORBIDRAFT_03g026896 [Sorghum bicolor] gb|EES01011.1| hypothetical protein SORBIDRAFT_03g026896 [Sorghum bicolor]
isotig01594	isogroup00057	1258	dbj|BAK06031.1|	predicted protein [Hordeum vulgare subsp. vulgare]
isotig01595	isogroup00057	1258	dbj|BAK06031.1|	predicted protein [Hordeum vulgare subsp. vulgare]
isotig01596	isogroup00057	1230	gb|EEE51701.1|	hypothetical protein OsJ_33076 [Oryza sativa Japonica Group]
isotig01597	isogroup00057	1122	dbj|BAK06031.1|	predicted protein [Hordeum vulgare subsp. vulgare]
isotig01598	isogroup00057	1122	dbj|BAK06031.1|	predicted protein [Hordeum vulgare subsp. vulgare]
isotig01599	isogroup00057	934	dbj|BAK06031.1|	predicted protein [Hordeum vulgare subsp. vulgare]
isotig01600	isogroup00057	851
isotig01601	isogroup00057	616	ref|XP_002455891.1|	hypothetical protein SORBIDRAFT_03g026896 [Sorghum bicolor] gb|EES01011.1| hypothetical protein SORBIDRAFT_03g026896 [Sorghum bicolor]
isotig01602	isogroup00057	324
isotig01603	isogroup00058	4238	ref|XP_002452712.1|	hypothetical protein SORBIDRAFT_04g031170 [Sorghum bicolor] gb|EES05688.1| hypothetical protein SORBIDRAFT_04g031170 [Sorghum bicolor]
isotig01604	isogroup00058	4238	ref|XP_002452712.1|	hypothetical protein SORBIDRAFT_04g031170 [Sorghum bicolor] gb|EES05688.1| hypothetical protein SORBIDRAFT_04g031170 [Sorghum bicolor]
isotig01605	isogroup00058	4238	ref|XP_002452712.1|	hypothetical protein SORBIDRAFT_04g031170 [Sorghum bicolor] gb|EES05688.1| hypothetical protein SORBIDRAFT_04g031170 [Sorghum bicolor]
isotig01606	isogroup00058	4238	ref|XP_002452712.1|	hypothetical protein SORBIDRAFT_04g031170 [Sorghum bicolor] gb|EES05688.1| hypothetical protein SORBIDRAFT_04g031170 [Sorghum bicolor]
isotig01607	isogroup00058	4238	ref|XP_002452712.1|	hypothetical protein SORBIDRAFT_04g031170 [Sorghum bicolor] gb|EES05688.1| hypothetical protein SORBIDRAFT_04g031170 [Sorghum bicolor]
isotig01608	isogroup00058	4238	ref|XP_002452712.1|	hypothetical protein SORBIDRAFT_04g031170 [Sorghum bicolor] gb|EES05688.1| hypothetical protein SORBIDRAFT_04g031170 [Sorghum bicolor]
isotig01609	isogroup00058	4238	ref|XP_002452712.1|	hypothetical protein SORBIDRAFT_04g031170 [Sorghum bicolor] gb|EES05688.1| hypothetical protein SORBIDRAFT_04g031170 [Sorghum bicolor]
isotig01610	isogroup00058	4238	ref|XP_002452712.1|	hypothetical protein SORBIDRAFT_04g031170 [Sorghum bicolor] gb|EES05688.1| hypothetical protein SORBIDRAFT_04g031170 [Sorghum bicolor]
isotig01611	isogroup00058	4238	ref|XP_002452712.1|	hypothetical protein SORBIDRAFT_04g031170 [Sorghum bicolor] gb|EES05688.1| hypothetical protein SORBIDRAFT_04g031170 [Sorghum bicolor]
isotig01612	isogroup00058	4238	ref|XP_002452712.1|	hypothetical protein SORBIDRAFT_04g031170 [Sorghum bicolor] gb|EES05688.1| hypothetical protein SORBIDRAFT_04g031170 [Sorghum bicolor]
isotig01613	isogroup00058	4238	ref|XP_002452712.1|	hypothetical protein SORBIDRAFT_04g031170 [Sorghum bicolor] gb|EES05688.1| hypothetical protein SORBIDRAFT_04g031170 [Sorghum bicolor]
isotig01614	isogroup00058	4238	ref|XP_002452712.1|	hypothetical protein SORBIDRAFT_04g031170 [Sorghum bicolor] gb|EES05688.1| hypothetical protein SORBIDRAFT_04g031170 [Sorghum bicolor]
isotig01615	isogroup00058	4238	ref|XP_002452712.1|	hypothetical protein SORBIDRAFT_04g031170 [Sorghum bicolor] gb|EES05688.1| hypothetical protein SORBIDRAFT_04g031170 [Sorghum bicolor]
isotig01616	isogroup00058	4238	ref|XP_002452712.1|	hypothetical protein SORBIDRAFT_04g031170 [Sorghum bicolor] gb|EES05688.1| hypothetical protein SORBIDRAFT_04g031170 [Sorghum bicolor]
isotig01617	isogroup00058	4238	ref|XP_002452712.1|	hypothetical protein SORBIDRAFT_04g031170 [Sorghum bicolor] gb|EES05688.1| hypothetical protein SORBIDRAFT_04g031170 [Sorghum bicolor]
isotig01618	isogroup00058	4238	ref|XP_002452712.1|	hypothetical protein SORBIDRAFT_04g031170 [Sorghum bicolor] gb|EES05688.1| hypothetical protein SORBIDRAFT_04g031170 [Sorghum bicolor]
isotig01619	isogroup00058	4238	ref|XP_002452712.1|	hypothetical protein SORBIDRAFT_04g031170 [Sorghum bicolor] gb|EES05688.1| hypothetical protein SORBIDRAFT_04g031170 [Sorghum bicolor]
isotig01620	isogroup00058	4238	ref|XP_002452712.1|	hypothetical protein SORBIDRAFT_04g031170 [Sorghum bicolor] gb|EES05688.1| hypothetical protein SORBIDRAFT_04g031170 [Sorghum bicolor]
isotig01621	isogroup00058	4238	ref|XP_002452712.1|	hypothetical protein SORBIDRAFT_04g031170 [Sorghum bicolor] gb|EES05688.1| hypothetical protein SORBIDRAFT_04g031170 [Sorghum bicolor]
isotig01622	isogroup00058	4238	ref|XP_002452712.1|	hypothetical protein SORBIDRAFT_04g031170 [Sorghum bicolor] gb|EES05688.1| hypothetical protein SORBIDRAFT_04g031170 [Sorghum bicolor]
isotig01623	isogroup00058	4237	ref|XP_002452712.1|	hypothetical protein SORBIDRAFT_04g031170 [Sorghum bicolor] gb|EES05688.1| hypothetical protein SORBIDRAFT_04g031170 [Sorghum bicolor]
isotig01624	isogroup00058	4238	ref|XP_002452712.1|	hypothetical protein SORBIDRAFT_04g031170 [Sorghum bicolor] gb|EES05688.1| hypothetical protein SORBIDRAFT_04g031170 [Sorghum bicolor]
isotig01625	isogroup00058	4237	ref|XP_002452712.1|	hypothetical protein SORBIDRAFT_04g031170 [Sorghum bicolor] gb|EES05688.1| hypothetical protein SORBIDRAFT_04g031170 [Sorghum bicolor]
isotig01626	isogroup00058	4238	ref|XP_002452712.1|	hypothetical protein SORBIDRAFT_04g031170 [Sorghum bicolor] gb|EES05688.1| hypothetical protein SORBIDRAFT_04g031170 [Sorghum bicolor]
isotig01627	isogroup00058	4238	ref|XP_002452712.1|	hypothetical protein SORBIDRAFT_04g031170 [Sorghum bicolor] gb|EES05688.1| hypothetical protein SORBIDRAFT_04g031170 [Sorghum bicolor]
isotig01628	isogroup00058	4238	ref|XP_002452712.1|	hypothetical protein SORBIDRAFT_04g031170 [Sorghum bicolor] gb|EES05688.1| hypothetical protein SORBIDRAFT_04g031170 [Sorghum bicolor]
isotig01629	isogroup00058	4237	ref|XP_002452712.1|	hypothetical protein SORBIDRAFT_04g031170 [Sorghum bicolor] gb|EES05688.1| hypothetical protein SORBIDRAFT_04g031170 [Sorghum bicolor]
isotig01630	isogroup00058	4238	ref|XP_002452712.1|	hypothetical protein SORBIDRAFT_04g031170 [Sorghum bicolor] gb|EES05688.1| hypothetical protein SORBIDRAFT_04g031170 [Sorghum bicolor]
isotig01631	isogroup00058	4238	ref|XP_002452712.1|	hypothetical protein SORBIDRAFT_04g031170 [Sorghum bicolor] gb|EES05688.1| hypothetical protein SORBIDRAFT_04g031170 [Sorghum bicolor]
isotig01632	isogroup00058	4237	ref|XP_002452712.1|	hypothetical protein SORBIDRAFT_04g031170 [Sorghum bicolor] gb|EES05688.1| hypothetical protein SORBIDRAFT_04g031170 [Sorghum bicolor]
isotig01633	isogroup00058	4238	ref|XP_002452712.1|	hypothetical protein SORBIDRAFT_04g031170 [Sorghum bicolor] gb|EES05688.1| hypothetical protein SORBIDRAFT_04g031170 [Sorghum bicolor]
isotig01634	isogroup00058	4238	ref|XP_002452712.1|	hypothetical protein SORBIDRAFT_04g031170 [Sorghum bicolor] gb|EES05688.1| hypothetical protein SORBIDRAFT_04g031170 [Sorghum bicolor]
isotig01635	isogroup00058	4238	ref|XP_002452712.1|	hypothetical protein SORBIDRAFT_04g031170 [Sorghum bicolor] gb|EES05688.1| hypothetical protein SORBIDRAFT_04g031170 [Sorghum bicolor]
isotig01636	isogroup00058	4238	ref|XP_002452712.1|	hypothetical protein SORBIDRAFT_04g031170 [Sorghum bicolor] gb|EES05688.1| hypothetical protein SORBIDRAFT_04g031170 [Sorghum bicolor]
isotig01637	isogroup00058	4238	ref|XP_002452712.1|	hypothetical protein SORBIDRAFT_04g031170 [Sorghum bicolor] gb|EES05688.1| hypothetical protein SORBIDRAFT_04g031170 [Sorghum bicolor]
isotig01638	isogroup00058	4238	ref|XP_002452712.1|	hypothetical protein SORBIDRAFT_04g031170 [Sorghum bicolor] gb|EES05688.1| hypothetical protein SORBIDRAFT_04g031170 [Sorghum bicolor]
isotig01639	isogroup00058	4238	ref|XP_002452712.1|	hypothetical protein SORBIDRAFT_04g031170 [Sorghum bicolor] gb|EES05688.1| hypothetical protein SORBIDRAFT_04g031170 [Sorghum bicolor]
isotig01640	isogroup00058	4238	ref|XP_002452712.1|	hypothetical protein SORBIDRAFT_04g031170 [Sorghum bicolor] gb|EES05688.1| hypothetical protein SORBIDRAFT_04g031170 [Sorghum bicolor]
isotig01641	isogroup00058	4238	ref|XP_002452712.1|	hypothetical protein SORBIDRAFT_04g031170 [Sorghum bicolor] gb|EES05688.1| hypothetical protein SORBIDRAFT_04g031170 [Sorghum bicolor]
isotig01642	isogroup00058	4237	ref|XP_002452712.1|	hypothetical protein SORBIDRAFT_04g031170 [Sorghum bicolor] gb|EES05688.1| hypothetical protein SORBIDRAFT_04g031170 [Sorghum bicolor]
isotig01643	isogroup00058	4237	ref|XP_002452712.1|	hypothetical protein SORBIDRAFT_04g031170 [Sorghum bicolor] gb|EES05688.1| hypothetical protein SORBIDRAFT_04g031170 [Sorghum bicolor]
isotig01644	isogroup00058	4237	ref|XP_002452712.1|	hypothetical protein SORBIDRAFT_04g031170 [Sorghum bicolor] gb|EES05688.1| hypothetical protein SORBIDRAFT_04g031170 [Sorghum bicolor]
isotig01645	isogroup00058	4238	ref|XP_002452712.1|	hypothetical protein SORBIDRAFT_04g031170 [Sorghum bicolor] gb|EES05688.1| hypothetical protein SORBIDRAFT_04g031170 [Sorghum bicolor]
isotig01646	isogroup00058	4237	ref|XP_002452712.1|	hypothetical protein SORBIDRAFT_04g031170 [Sorghum bicolor] gb|EES05688.1| hypothetical protein SORBIDRAFT_04g031170 [Sorghum bicolor]
isotig01647	isogroup00058	4237	ref|XP_002452712.1|	hypothetical protein SORBIDRAFT_04g031170 [Sorghum bicolor] gb|EES05688.1| hypothetical protein SORBIDRAFT_04g031170 [Sorghum bicolor]
isotig01648	isogroup00058	4238	ref|XP_002452712.1|	hypothetical protein SORBIDRAFT_04g031170 [Sorghum bicolor] gb|EES05688.1| hypothetical protein SORBIDRAFT_04g031170 [Sorghum bicolor]
isotig01649	isogroup00058	4238	ref|XP_002452712.1|	hypothetical protein SORBIDRAFT_04g031170 [Sorghum bicolor] gb|EES05688.1| hypothetical protein SORBIDRAFT_04g031170 [Sorghum bicolor]
isotig01650	isogroup00058	4237	ref|XP_002452712.1|	hypothetical protein SORBIDRAFT_04g031170 [Sorghum bicolor] gb|EES05688.1| hypothetical protein SORBIDRAFT_04g031170 [Sorghum bicolor]
isotig01651	isogroup00058	4237	ref|XP_002452712.1|	hypothetical protein SORBIDRAFT_04g031170 [Sorghum bicolor] gb|EES05688.1| hypothetical protein SORBIDRAFT_04g031170 [Sorghum bicolor]
isotig01652	isogroup00058	4238	ref|XP_002452712.1|	hypothetical protein SORBIDRAFT_04g031170 [Sorghum bicolor] gb|EES05688.1| hypothetical protein SORBIDRAFT_04g031170 [Sorghum bicolor]
isotig01653	isogroup00058	4237	ref|XP_002452712.1|	hypothetical protein SORBIDRAFT_04g031170 [Sorghum bicolor] gb|EES05688.1| hypothetical protein SORBIDRAFT_04g031170 [Sorghum bicolor]
isotig01654	isogroup00058	4238	ref|XP_002452712.1|	hypothetical protein SORBIDRAFT_04g031170 [Sorghum bicolor] gb|EES05688.1| hypothetical protein SORBIDRAFT_04g031170 [Sorghum bicolor]
isotig01655	isogroup00058	4237	ref|XP_002452712.1|	hypothetical protein SORBIDRAFT_04g031170 [Sorghum bicolor] gb|EES05688.1| hypothetical protein SORBIDRAFT_04g031170 [Sorghum bicolor]
isotig01656	isogroup00058	4238	ref|XP_002452712.1|	hypothetical protein SORBIDRAFT_04g031170 [Sorghum bicolor] gb|EES05688.1| hypothetical protein SORBIDRAFT_04g031170 [Sorghum bicolor]
isotig01657	isogroup00058	4237	ref|XP_002452712.1|	hypothetical protein SORBIDRAFT_04g031170 [Sorghum bicolor] gb|EES05688.1| hypothetical protein SORBIDRAFT_04g031170 [Sorghum bicolor]
isotig01658	isogroup00058	4237	ref|XP_002452712.1|	hypothetical protein SORBIDRAFT_04g031170 [Sorghum bicolor] gb|EES05688.1| hypothetical protein SORBIDRAFT_04g031170 [Sorghum bicolor]
isotig01659	isogroup00058	4238	ref|XP_002452712.1|	hypothetical protein SORBIDRAFT_04g031170 [Sorghum bicolor] gb|EES05688.1| hypothetical protein SORBIDRAFT_04g031170 [Sorghum bicolor]
isotig01660	isogroup00058	4238	ref|XP_002452712.1|	hypothetical protein SORBIDRAFT_04g031170 [Sorghum bicolor] gb|EES05688.1| hypothetical protein SORBIDRAFT_04g031170 [Sorghum bicolor]
isotig01661	isogroup00058	4237	ref|XP_002452712.1|	hypothetical protein SORBIDRAFT_04g031170 [Sorghum bicolor] gb|EES05688.1| hypothetical protein SORBIDRAFT_04g031170 [Sorghum bicolor]
isotig01662	isogroup00058	4238	ref|XP_002452712.1|	hypothetical protein SORBIDRAFT_04g031170 [Sorghum bicolor] gb|EES05688.1| hypothetical protein SORBIDRAFT_04g031170 [Sorghum bicolor]
isotig01663	isogroup00058	4237	ref|XP_002452712.1|	hypothetical protein SORBIDRAFT_04g031170 [Sorghum bicolor] gb|EES05688.1| hypothetical protein SORBIDRAFT_04g031170 [Sorghum bicolor]
isotig01664	isogroup00058	4237	ref|XP_002452712.1|	hypothetical protein SORBIDRAFT_04g031170 [Sorghum bicolor] gb|EES05688.1| hypothetical protein SORBIDRAFT_04g031170 [Sorghum bicolor]
isotig01665	isogroup00058	4237	ref|XP_002452712.1|	hypothetical protein SORBIDRAFT_04g031170 [Sorghum bicolor] gb|EES05688.1| hypothetical protein SORBIDRAFT_04g031170 [Sorghum bicolor]
isotig01666	isogroup00058	4237	ref|XP_002452712.1|	hypothetical protein SORBIDRAFT_04g031170 [Sorghum bicolor] gb|EES05688.1| hypothetical protein SORBIDRAFT_04g031170 [Sorghum bicolor]
isotig01667	isogroup00058	4237	ref|XP_002452712.1|	hypothetical protein SORBIDRAFT_04g031170 [Sorghum bicolor] gb|EES05688.1| hypothetical protein SORBIDRAFT_04g031170 [Sorghum bicolor]
isotig01668	isogroup00058	4237	ref|XP_002452712.1|	hypothetical protein SORBIDRAFT_04g031170 [Sorghum bicolor] gb|EES05688.1| hypothetical protein SORBIDRAFT_04g031170 [Sorghum bicolor]
isotig01669	isogroup00058	4237	ref|XP_002452712.1|	hypothetical protein SORBIDRAFT_04g031170 [Sorghum bicolor] gb|EES05688.1| hypothetical protein SORBIDRAFT_04g031170 [Sorghum bicolor]
isotig01670	isogroup00058	4237	ref|XP_002452712.1|	hypothetical protein SORBIDRAFT_04g031170 [Sorghum bicolor] gb|EES05688.1| hypothetical protein SORBIDRAFT_04g031170 [Sorghum bicolor]
isotig01671	isogroup00058	4238	ref|XP_002452712.1|	hypothetical protein SORBIDRAFT_04g031170 [Sorghum bicolor] gb|EES05688.1| hypothetical protein SORBIDRAFT_04g031170 [Sorghum bicolor]
isotig01672	isogroup00058	4237	ref|XP_002452712.1|	hypothetical protein SORBIDRAFT_04g031170 [Sorghum bicolor] gb|EES05688.1| hypothetical protein SORBIDRAFT_04g031170 [Sorghum bicolor]
isotig01673	isogroup00058	4237	ref|XP_002452712.1|	hypothetical protein SORBIDRAFT_04g031170 [Sorghum bicolor] gb|EES05688.1| hypothetical protein SORBIDRAFT_04g031170 [Sorghum bicolor]
isotig01674	isogroup00058	4237	ref|XP_002452712.1|	hypothetical protein SORBIDRAFT_04g031170 [Sorghum bicolor] gb|EES05688.1| hypothetical protein SORBIDRAFT_04g031170 [Sorghum bicolor]
isotig01675	isogroup00058	4238	ref|XP_002452712.1|	hypothetical protein SORBIDRAFT_04g031170 [Sorghum bicolor] gb|EES05688.1| hypothetical protein SORBIDRAFT_04g031170 [Sorghum bicolor]
isotig01676	isogroup00058	4237	ref|XP_002452712.1|	hypothetical protein SORBIDRAFT_04g031170 [Sorghum bicolor] gb|EES05688.1| hypothetical protein SORBIDRAFT_04g031170 [Sorghum bicolor]
isotig01677	isogroup00058	4237	ref|XP_002452712.1|	hypothetical protein SORBIDRAFT_04g031170 [Sorghum bicolor] gb|EES05688.1| hypothetical protein SORBIDRAFT_04g031170 [Sorghum bicolor]
isotig01678	isogroup00058	4238	ref|XP_002452712.1|	hypothetical protein SORBIDRAFT_04g031170 [Sorghum bicolor] gb|EES05688.1| hypothetical protein SORBIDRAFT_04g031170 [Sorghum bicolor]
isotig01679	isogroup00058	4237	ref|XP_002452712.1|	hypothetical protein SORBIDRAFT_04g031170 [Sorghum bicolor] gb|EES05688.1| hypothetical protein SORBIDRAFT_04g031170 [Sorghum bicolor]
isotig01680	isogroup00058	4237	ref|XP_002452712.1|	hypothetical protein SORBIDRAFT_04g031170 [Sorghum bicolor] gb|EES05688.1| hypothetical protein SORBIDRAFT_04g031170 [Sorghum bicolor]
isotig01681	isogroup00058	4238	ref|XP_002452712.1|	hypothetical protein SORBIDRAFT_04g031170 [Sorghum bicolor] gb|EES05688.1| hypothetical protein SORBIDRAFT_04g031170 [Sorghum bicolor]
isotig01682	isogroup00058	4237	ref|XP_002452712.1|	hypothetical protein SORBIDRAFT_04g031170 [Sorghum bicolor] gb|EES05688.1| hypothetical protein SORBIDRAFT_04g031170 [Sorghum bicolor]
isotig01683	isogroup00058	4237	ref|XP_002452712.1|	hypothetical protein SORBIDRAFT_04g031170 [Sorghum bicolor] gb|EES05688.1| hypothetical protein SORBIDRAFT_04g031170 [Sorghum bicolor]
isotig01684	isogroup00058	4237	ref|XP_002452712.1|	hypothetical protein SORBIDRAFT_04g031170 [Sorghum bicolor] gb|EES05688.1| hypothetical protein SORBIDRAFT_04g031170 [Sorghum bicolor]
isotig01685	isogroup00058	4237	ref|XP_002452712.1|	hypothetical protein SORBIDRAFT_04g031170 [Sorghum bicolor] gb|EES05688.1| hypothetical protein SORBIDRAFT_04g031170 [Sorghum bicolor]
isotig01686	isogroup00058	4237	ref|XP_002452712.1|	hypothetical protein SORBIDRAFT_04g031170 [Sorghum bicolor] gb|EES05688.1| hypothetical protein SORBIDRAFT_04g031170 [Sorghum bicolor]
isotig01687	isogroup00058	4237	ref|XP_002452712.1|	hypothetical protein SORBIDRAFT_04g031170 [Sorghum bicolor] gb|EES05688.1| hypothetical protein SORBIDRAFT_04g031170 [Sorghum bicolor]
isotig01688	isogroup00058	4237	ref|XP_002452712.1|	hypothetical protein SORBIDRAFT_04g031170 [Sorghum bicolor] gb|EES05688.1| hypothetical protein SORBIDRAFT_04g031170 [Sorghum bicolor]
isotig01689	isogroup00058	4237	ref|XP_002452712.1|	hypothetical protein SORBIDRAFT_04g031170 [Sorghum bicolor] gb|EES05688.1| hypothetical protein SORBIDRAFT_04g031170 [Sorghum bicolor]
isotig01690	isogroup00058	4237	ref|XP_002452712.1|	hypothetical protein SORBIDRAFT_04g031170 [Sorghum bicolor] gb|EES05688.1| hypothetical protein SORBIDRAFT_04g031170 [Sorghum bicolor]
isotig01691	isogroup00058	4237	ref|XP_002452712.1|	hypothetical protein SORBIDRAFT_04g031170 [Sorghum bicolor] gb|EES05688.1| hypothetical protein SORBIDRAFT_04g031170 [Sorghum bicolor]
isotig01692	isogroup00058	4237	ref|XP_002452712.1|	hypothetical protein SORBIDRAFT_04g031170 [Sorghum bicolor] gb|EES05688.1| hypothetical protein SORBIDRAFT_04g031170 [Sorghum bicolor]
isotig01693	isogroup00058	4237	ref|XP_002452712.1|	hypothetical protein SORBIDRAFT_04g031170 [Sorghum bicolor] gb|EES05688.1| hypothetical protein SORBIDRAFT_04g031170 [Sorghum bicolor]
isotig01694	isogroup00058	4237	ref|XP_002452712.1|	hypothetical protein SORBIDRAFT_04g031170 [Sorghum bicolor] gb|EES05688.1| hypothetical protein SORBIDRAFT_04g031170 [Sorghum bicolor]
isotig01695	isogroup00058	4237	ref|XP_002452712.1|	hypothetical protein SORBIDRAFT_04g031170 [Sorghum bicolor] gb|EES05688.1| hypothetical protein SORBIDRAFT_04g031170 [Sorghum bicolor]
isotig01696	isogroup00058	4237	ref|XP_002452712.1|	hypothetical protein SORBIDRAFT_04g031170 [Sorghum bicolor] gb|EES05688.1| hypothetical protein SORBIDRAFT_04g031170 [Sorghum bicolor]
isotig01697	isogroup00058	4237	ref|XP_002452712.1|	hypothetical protein SORBIDRAFT_04g031170 [Sorghum bicolor] gb|EES05688.1| hypothetical protein SORBIDRAFT_04g031170 [Sorghum bicolor]
isotig01698	isogroup00058	4237	ref|XP_002452712.1|	hypothetical protein SORBIDRAFT_04g031170 [Sorghum bicolor] gb|EES05688.1| hypothetical protein SORBIDRAFT_04g031170 [Sorghum bicolor]
isotig01699	isogroup00059	1429	ref|XP_002467502.1|	hypothetical protein SORBIDRAFT_01g029230 [Sorghum bicolor] gb|EER94500.1| hypothetical protein SORBIDRAFT_01g029230 [Sorghum bicolor]
isotig01700	isogroup00059	1428	ref|XP_002467502.1|	hypothetical protein SORBIDRAFT_01g029230 [Sorghum bicolor] gb|EER94500.1| hypothetical protein SORBIDRAFT_01g029230 [Sorghum bicolor]
isotig01701	isogroup00059	1429	ref|XP_002467502.1|	hypothetical protein SORBIDRAFT_01g029230 [Sorghum bicolor] gb|EER94500.1| hypothetical protein SORBIDRAFT_01g029230 [Sorghum bicolor]
isotig01702	isogroup00059	1426	ref|XP_002467502.1|	hypothetical protein SORBIDRAFT_01g029230 [Sorghum bicolor] gb|EER94500.1| hypothetical protein SORBIDRAFT_01g029230 [Sorghum bicolor]
isotig01703	isogroup00059	1428	ref|XP_002467502.1|	hypothetical protein SORBIDRAFT_01g029230 [Sorghum bicolor] gb|EER94500.1| hypothetical protein SORBIDRAFT_01g029230 [Sorghum bicolor]
isotig01704	isogroup00059	1430	ref|XP_002467502.1|	hypothetical protein SORBIDRAFT_01g029230 [Sorghum bicolor] gb|EER94500.1| hypothetical protein SORBIDRAFT_01g029230 [Sorghum bicolor]
isotig01705	isogroup00059	1429	ref|XP_002467502.1|	hypothetical protein SORBIDRAFT_01g029230 [Sorghum bicolor] gb|EER94500.1| hypothetical protein SORBIDRAFT_01g029230 [Sorghum bicolor]
isotig01706	isogroup00059	1426	ref|XP_002467502.1|	hypothetical protein SORBIDRAFT_01g029230 [Sorghum bicolor] gb|EER94500.1| hypothetical protein SORBIDRAFT_01g029230 [Sorghum bicolor]
isotig01707	isogroup00059	1427	ref|XP_002467502.1|	hypothetical protein SORBIDRAFT_01g029230 [Sorghum bicolor] gb|EER94500.1| hypothetical protein SORBIDRAFT_01g029230 [Sorghum bicolor]
isotig01708	isogroup00059	1415	ref|XP_002467502.1|	hypothetical protein SORBIDRAFT_01g029230 [Sorghum bicolor] gb|EER94500.1| hypothetical protein SORBIDRAFT_01g029230 [Sorghum bicolor]
isotig01709	isogroup00059	1414	ref|XP_002467502.1|	hypothetical protein SORBIDRAFT_01g029230 [Sorghum bicolor] gb|EER94500.1| hypothetical protein SORBIDRAFT_01g029230 [Sorghum bicolor]
isotig01710	isogroup00059	1412	ref|XP_002467502.1|	hypothetical protein SORBIDRAFT_01g029230 [Sorghum bicolor] gb|EER94500.1| hypothetical protein SORBIDRAFT_01g029230 [Sorghum bicolor]
isotig01711	isogroup00059	1421	ref|XP_002467502.1|	hypothetical protein SORBIDRAFT_01g029230 [Sorghum bicolor] gb|EER94500.1| hypothetical protein SORBIDRAFT_01g029230 [Sorghum bicolor]
isotig01712	isogroup00059	1420	ref|XP_002467502.1|	hypothetical protein SORBIDRAFT_01g029230 [Sorghum bicolor] gb|EER94500.1| hypothetical protein SORBIDRAFT_01g029230 [Sorghum bicolor]
isotig01713	isogroup00059	1416	ref|XP_002467502.1|	hypothetical protein SORBIDRAFT_01g029230 [Sorghum bicolor] gb|EER94500.1| hypothetical protein SORBIDRAFT_01g029230 [Sorghum bicolor]
isotig01714	isogroup00059	1421	ref|XP_002467502.1|	hypothetical protein SORBIDRAFT_01g029230 [Sorghum bicolor] gb|EER94500.1| hypothetical protein SORBIDRAFT_01g029230 [Sorghum bicolor]
isotig01715	isogroup00059	1418	ref|XP_002467502.1|	hypothetical protein SORBIDRAFT_01g029230 [Sorghum bicolor] gb|EER94500.1| hypothetical protein SORBIDRAFT_01g029230 [Sorghum bicolor]
isotig01716	isogroup00059	1422	ref|XP_002467502.1|	hypothetical protein SORBIDRAFT_01g029230 [Sorghum bicolor] gb|EER94500.1| hypothetical protein SORBIDRAFT_01g029230 [Sorghum bicolor]
isotig01717	isogroup00059	1420	ref|XP_002467502.1|	hypothetical protein SORBIDRAFT_01g029230 [Sorghum bicolor] gb|EER94500.1| hypothetical protein SORBIDRAFT_01g029230 [Sorghum bicolor]
isotig01718	isogroup00059	1421	ref|XP_002467502.1|	hypothetical protein SORBIDRAFT_01g029230 [Sorghum bicolor] gb|EER94500.1| hypothetical protein SORBIDRAFT_01g029230 [Sorghum bicolor]
isotig01719	isogroup00059	1418	ref|XP_002467502.1|	hypothetical protein SORBIDRAFT_01g029230 [Sorghum bicolor] gb|EER94500.1| hypothetical protein SORBIDRAFT_01g029230 [Sorghum bicolor]
isotig01720	isogroup00059	1419	ref|XP_002467502.1|	hypothetical protein SORBIDRAFT_01g029230 [Sorghum bicolor] gb|EER94500.1| hypothetical protein SORBIDRAFT_01g029230 [Sorghum bicolor]
isotig01721	isogroup00059	1407	ref|XP_002467502.1|	hypothetical protein SORBIDRAFT_01g029230 [Sorghum bicolor] gb|EER94500.1| hypothetical protein SORBIDRAFT_01g029230 [Sorghum bicolor]
isotig01722	isogroup00059	1406	ref|XP_002467502.1|	hypothetical protein SORBIDRAFT_01g029230 [Sorghum bicolor] gb|EER94500.1| hypothetical protein SORBIDRAFT_01g029230 [Sorghum bicolor]
isotig01723	isogroup00059	1404	ref|XP_002467502.1|	hypothetical protein SORBIDRAFT_01g029230 [Sorghum bicolor] gb|EER94500.1| hypothetical protein SORBIDRAFT_01g029230 [Sorghum bicolor]
isotig01724	isogroup00059	1408	ref|XP_002467502.1|	hypothetical protein SORBIDRAFT_01g029230 [Sorghum bicolor] gb|EER94500.1| hypothetical protein SORBIDRAFT_01g029230 [Sorghum bicolor]
isotig01725	isogroup00059	1414	ref|XP_002467502.1|	hypothetical protein SORBIDRAFT_01g029230 [Sorghum bicolor] gb|EER94500.1| hypothetical protein SORBIDRAFT_01g029230 [Sorghum bicolor]
isotig01726	isogroup00059	1413	ref|XP_002467502.1|	hypothetical protein SORBIDRAFT_01g029230 [Sorghum bicolor] gb|EER94500.1| hypothetical protein SORBIDRAFT_01g029230 [Sorghum bicolor]
isotig01727	isogroup00059	1414	ref|XP_002467502.1|	hypothetical protein SORBIDRAFT_01g029230 [Sorghum bicolor] gb|EER94500.1| hypothetical protein SORBIDRAFT_01g029230 [Sorghum bicolor]
isotig01728	isogroup00059	1411	ref|XP_002467502.1|	hypothetical protein SORBIDRAFT_01g029230 [Sorghum bicolor] gb|EER94500.1| hypothetical protein SORBIDRAFT_01g029230 [Sorghum bicolor]
isotig01729	isogroup00059	1415	ref|XP_002467502.1|	hypothetical protein SORBIDRAFT_01g029230 [Sorghum bicolor] gb|EER94500.1| hypothetical protein SORBIDRAFT_01g029230 [Sorghum bicolor]
isotig01730	isogroup00059	1413	ref|XP_002467502.1|	hypothetical protein SORBIDRAFT_01g029230 [Sorghum bicolor] gb|EER94500.1| hypothetical protein SORBIDRAFT_01g029230 [Sorghum bicolor]
isotig01731	isogroup00059	1414	ref|XP_002467502.1|	hypothetical protein SORBIDRAFT_01g029230 [Sorghum bicolor] gb|EER94500.1| hypothetical protein SORBIDRAFT_01g029230 [Sorghum bicolor]
isotig01732	isogroup00059	1411	ref|XP_002467502.1|	hypothetical protein SORBIDRAFT_01g029230 [Sorghum bicolor] gb|EER94500.1| hypothetical protein SORBIDRAFT_01g029230 [Sorghum bicolor]
isotig01733	isogroup00059	1412	ref|XP_002467502.1|	hypothetical protein SORBIDRAFT_01g029230 [Sorghum bicolor] gb|EER94500.1| hypothetical protein SORBIDRAFT_01g029230 [Sorghum bicolor]
isotig01734	isogroup00059	1400	ref|XP_002467502.1|	hypothetical protein SORBIDRAFT_01g029230 [Sorghum bicolor] gb|EER94500.1| hypothetical protein SORBIDRAFT_01g029230 [Sorghum bicolor]
isotig01735	isogroup00059	1399	ref|XP_002467502.1|	hypothetical protein SORBIDRAFT_01g029230 [Sorghum bicolor] gb|EER94500.1| hypothetical protein SORBIDRAFT_01g029230 [Sorghum bicolor]
isotig01736	isogroup00059	1397	ref|XP_002467502.1|	hypothetical protein SORBIDRAFT_01g029230 [Sorghum bicolor] gb|EER94500.1| hypothetical protein SORBIDRAFT_01g029230 [Sorghum bicolor]
isotig01737	isogroup00059	1414	ref|XP_002467502.1|	hypothetical protein SORBIDRAFT_01g029230 [Sorghum bicolor] gb|EER94500.1| hypothetical protein SORBIDRAFT_01g029230 [Sorghum bicolor]
isotig01738	isogroup00059	1413	ref|XP_002467502.1|	hypothetical protein SORBIDRAFT_01g029230 [Sorghum bicolor] gb|EER94500.1| hypothetical protein SORBIDRAFT_01g029230 [Sorghum bicolor]
isotig01739	isogroup00059	1401	ref|XP_002467502.1|	hypothetical protein SORBIDRAFT_01g029230 [Sorghum bicolor] gb|EER94500.1| hypothetical protein SORBIDRAFT_01g029230 [Sorghum bicolor]
isotig01740	isogroup00059	1414	ref|XP_002467502.1|	hypothetical protein SORBIDRAFT_01g029230 [Sorghum bicolor] gb|EER94500.1| hypothetical protein SORBIDRAFT_01g029230 [Sorghum bicolor]
isotig01741	isogroup00059	1411	ref|XP_002467502.1|	hypothetical protein SORBIDRAFT_01g029230 [Sorghum bicolor] gb|EER94500.1| hypothetical protein SORBIDRAFT_01g029230 [Sorghum bicolor]
isotig01742	isogroup00059	1415	ref|XP_002467502.1|	hypothetical protein SORBIDRAFT_01g029230 [Sorghum bicolor] gb|EER94500.1| hypothetical protein SORBIDRAFT_01g029230 [Sorghum bicolor]
isotig01743	isogroup00059	1413	ref|XP_002467502.1|	hypothetical protein SORBIDRAFT_01g029230 [Sorghum bicolor] gb|EER94500.1| hypothetical protein SORBIDRAFT_01g029230 [Sorghum bicolor]
isotig01744	isogroup00059	1414	ref|XP_002467502.1|	hypothetical protein SORBIDRAFT_01g029230 [Sorghum bicolor] gb|EER94500.1| hypothetical protein SORBIDRAFT_01g029230 [Sorghum bicolor]
isotig01745	isogroup00059	1411	ref|XP_002467502.1|	hypothetical protein SORBIDRAFT_01g029230 [Sorghum bicolor] gb|EER94500.1| hypothetical protein SORBIDRAFT_01g029230 [Sorghum bicolor]
isotig01746	isogroup00059	1412	ref|XP_002467502.1|	hypothetical protein SORBIDRAFT_01g029230 [Sorghum bicolor] gb|EER94500.1| hypothetical protein SORBIDRAFT_01g029230 [Sorghum bicolor]
isotig01747	isogroup00059	1400	ref|XP_002467502.1|	hypothetical protein SORBIDRAFT_01g029230 [Sorghum bicolor] gb|EER94500.1| hypothetical protein SORBIDRAFT_01g029230 [Sorghum bicolor]
isotig01748	isogroup00059	1399	ref|XP_002467502.1|	hypothetical protein SORBIDRAFT_01g029230 [Sorghum bicolor] gb|EER94500.1| hypothetical protein SORBIDRAFT_01g029230 [Sorghum bicolor]
isotig01749	isogroup00059	1397	ref|XP_002467502.1|	hypothetical protein SORBIDRAFT_01g029230 [Sorghum bicolor] gb|EER94500.1| hypothetical protein SORBIDRAFT_01g029230 [Sorghum bicolor]
isotig01750	isogroup00059	1401	ref|XP_002467502.1|	hypothetical protein SORBIDRAFT_01g029230 [Sorghum bicolor] gb|EER94500.1| hypothetical protein SORBIDRAFT_01g029230 [Sorghum bicolor]
isotig01751	isogroup00059	535
isotig01752	isogroup00059	534
isotig01753	isogroup00059	535
isotig01754	isogroup00059	532
isotig01755	isogroup00059	534
isotig01756	isogroup00059	536
isotig01757	isogroup00059	535
isotig01758	isogroup00059	532
isotig01759	isogroup00059	533
isotig01760	isogroup00059	521
isotig01761	isogroup00059	520
isotig01762	isogroup00059	518
isotig01763	isogroup00060	3804	emb|CCG47992.1|	pg1, putative, expressed [Triticum aestivum]
isotig01764	isogroup00060	3804	emb|CCG47992.1|	pg1, putative, expressed [Triticum aestivum]
isotig01765	isogroup00060	3803	emb|CCG47992.1|	pg1, putative, expressed [Triticum aestivum]
isotig01766	isogroup00060	3804	emb|CCG47992.1|	pg1, putative, expressed [Triticum aestivum]
isotig01767	isogroup00060	3804	emb|CCG47992.1|	pg1, putative, expressed [Triticum aestivum]
isotig01768	isogroup00060	3804	emb|CCG47992.1|	pg1, putative, expressed [Triticum aestivum]
isotig01769	isogroup00060	3804	emb|CCG47992.1|	pg1, putative, expressed [Triticum aestivum]
isotig01770	isogroup00060	3804	emb|CCG47992.1|	pg1, putative, expressed [Triticum aestivum]
isotig01771	isogroup00060	3803	emb|CCG47992.1|	pg1, putative, expressed [Triticum aestivum]
isotig01772	isogroup00060	3804	emb|CCG47992.1|	pg1, putative, expressed [Triticum aestivum]
isotig01773	isogroup00060	3803	emb|CCG47992.1|	pg1, putative, expressed [Triticum aestivum]
isotig01774	isogroup00060	3804	emb|CCG47992.1|	pg1, putative, expressed [Triticum aestivum]
isotig01775	isogroup00060	3804	emb|CCG47992.1|	pg1, putative, expressed [Triticum aestivum]
isotig01776	isogroup00060	3804	emb|CCG47992.1|	pg1, putative, expressed [Triticum aestivum]
isotig01777	isogroup00060	3803	emb|CCG47992.1|	pg1, putative, expressed [Triticum aestivum]
isotig01778	isogroup00060	3804	emb|CCG47992.1|	pg1, putative, expressed [Triticum aestivum]
isotig01779	isogroup00060	3804	emb|CCG47992.1|	pg1, putative, expressed [Triticum aestivum]
isotig01780	isogroup00060	3804	emb|CCG47992.1|	pg1, putative, expressed [Triticum aestivum]
isotig01781	isogroup00060	3803	emb|CCG47992.1|	pg1, putative, expressed [Triticum aestivum]
isotig01782	isogroup00060	3804	emb|CCG47992.1|	pg1, putative, expressed [Triticum aestivum]
isotig01783	isogroup00060	3804	emb|CCG47992.1|	pg1, putative, expressed [Triticum aestivum]
isotig01784	isogroup00060	3804	emb|CCG47992.1|	pg1, putative, expressed [Triticum aestivum]
isotig01785	isogroup00060	3803	emb|CCG47992.1|	pg1, putative, expressed [Triticum aestivum]
isotig01786	isogroup00060	3804	emb|CCG47992.1|	pg1, putative, expressed [Triticum aestivum]
isotig01787	isogroup00060	3360	emb|CCG47992.1|	pg1, putative, expressed [Triticum aestivum]
isotig01788	isogroup00060	3360	emb|CCG47992.1|	pg1, putative, expressed [Triticum aestivum]
isotig01789	isogroup00060	3359	emb|CCG47992.1|	pg1, putative, expressed [Triticum aestivum]
isotig01790	isogroup00060	3360	emb|CCG47992.1|	pg1, putative, expressed [Triticum aestivum]
isotig01791	isogroup00060	3360	emb|CCG47992.1|	pg1, putative, expressed [Triticum aestivum]
isotig01792	isogroup00060	3360	emb|CCG47992.1|	pg1, putative, expressed [Triticum aestivum]
isotig01793	isogroup00060	3360	emb|CCG47992.1|	pg1, putative, expressed [Triticum aestivum]
isotig01794	isogroup00060	3360	emb|CCG47992.1|	pg1, putative, expressed [Triticum aestivum]
isotig01795	isogroup00060	3359	emb|CCG47992.1|	pg1, putative, expressed [Triticum aestivum]
isotig01796	isogroup00060	3360	emb|CCG47992.1|	pg1, putative, expressed [Triticum aestivum]
isotig01797	isogroup00060	3359	emb|CCG47992.1|	pg1, putative, expressed [Triticum aestivum]
isotig01798	isogroup00060	3360	emb|CCG47992.1|	pg1, putative, expressed [Triticum aestivum]
isotig01799	isogroup00060	3360	emb|CCG47992.1|	pg1, putative, expressed [Triticum aestivum]
isotig01800	isogroup00060	3360	emb|CCG47992.1|	pg1, putative, expressed [Triticum aestivum]
isotig01801	isogroup00060	3359	emb|CCG47992.1|	pg1, putative, expressed [Triticum aestivum]
isotig01802	isogroup00060	3360	emb|CCG47992.1|	pg1, putative, expressed [Triticum aestivum]
isotig01803	isogroup00060	2982	ref|XP_002451155.1|	hypothetical protein SORBIDRAFT_05g025070 [Sorghum bicolor] gb|EES10143.1| hypothetical protein SORBIDRAFT_05g025070 [Sorghum bicolor]
isotig01804	isogroup00060	2982	ref|XP_002451155.1|	hypothetical protein SORBIDRAFT_05g025070 [Sorghum bicolor] gb|EES10143.1| hypothetical protein SORBIDRAFT_05g025070 [Sorghum bicolor]
isotig01805	isogroup00060	2982	ref|XP_002451155.1|	hypothetical protein SORBIDRAFT_05g025070 [Sorghum bicolor] gb|EES10143.1| hypothetical protein SORBIDRAFT_05g025070 [Sorghum bicolor]
isotig01806	isogroup00060	2982	ref|XP_002451155.1|	hypothetical protein SORBIDRAFT_05g025070 [Sorghum bicolor] gb|EES10143.1| hypothetical protein SORBIDRAFT_05g025070 [Sorghum bicolor]
isotig01807	isogroup00060	2982	ref|XP_002451155.1|	hypothetical protein SORBIDRAFT_05g025070 [Sorghum bicolor] gb|EES10143.1| hypothetical protein SORBIDRAFT_05g025070 [Sorghum bicolor]
isotig01808	isogroup00060	2982	ref|XP_002451155.1|	hypothetical protein SORBIDRAFT_05g025070 [Sorghum bicolor] gb|EES10143.1| hypothetical protein SORBIDRAFT_05g025070 [Sorghum bicolor]
isotig01809	isogroup00060	2538	ref|XP_002451155.1|	hypothetical protein SORBIDRAFT_05g025070 [Sorghum bicolor] gb|EES10143.1| hypothetical protein SORBIDRAFT_05g025070 [Sorghum bicolor]
isotig01810	isogroup00060	2538	ref|XP_002451155.1|	hypothetical protein SORBIDRAFT_05g025070 [Sorghum bicolor] gb|EES10143.1| hypothetical protein SORBIDRAFT_05g025070 [Sorghum bicolor]
isotig01811	isogroup00060	2538	ref|XP_002451155.1|	hypothetical protein SORBIDRAFT_05g025070 [Sorghum bicolor] gb|EES10143.1| hypothetical protein SORBIDRAFT_05g025070 [Sorghum bicolor]
isotig01812	isogroup00060	2538	ref|XP_002451155.1|	hypothetical protein SORBIDRAFT_05g025070 [Sorghum bicolor] gb|EES10143.1| hypothetical protein SORBIDRAFT_05g025070 [Sorghum bicolor]
isotig01813	isogroup00061	1547	ref|XP_002461070.1|	hypothetical protein SORBIDRAFT_02g040170 [Sorghum bicolor] gb|EER97591.1| hypothetical protein SORBIDRAFT_02g040170 [Sorghum bicolor]
isotig01814	isogroup00061	1547	ref|NP_001060356.1|	Os07g0630400 [Oryza sativa Japonica Group] dbj|BAC20682.1| putative aleurone ribonuclease [Oryza sativa Japonica Group] dbj|BAF22270.1| Os07g0630400 [Oryza sativa Japonica Group] gb|EAZ40755.1| hypothetical protein OsJ_25228 [Oryza sativa Japonica Group] dbj|BAG96743.1| unnamed protein product [Oryza sativa Japonica Group] dbj|BAG87404.1| unnamed protein product [Oryza sativa Japonica Group]
isotig01815	isogroup00061	1415	ref|NP_001060356.1|	Os07g0630400 [Oryza sativa Japonica Group] dbj|BAC20682.1| putative aleurone ribonuclease [Oryza sativa Japonica Group] dbj|BAF22270.1| Os07g0630400 [Oryza sativa Japonica Group] gb|EAZ40755.1| hypothetical protein OsJ_25228 [Oryza sativa Japonica Group] dbj|BAG96743.1| unnamed protein product [Oryza sativa Japonica Group] dbj|BAG87404.1| unnamed protein product [Oryza sativa Japonica Group]
isotig01816	isogroup00061	1548	emb|CAJ77498.1|	putative ribonuclease T2 precursor [Solanum tuberosum]
isotig01817	isogroup00061	1412	ref|XP_002461070.1|	hypothetical protein SORBIDRAFT_02g040170 [Sorghum bicolor] gb|EER97591.1| hypothetical protein SORBIDRAFT_02g040170 [Sorghum bicolor]
isotig01818	isogroup00061	1415	ref|NP_001060356.1|	Os07g0630400 [Oryza sativa Japonica Group] dbj|BAC20682.1| putative aleurone ribonuclease [Oryza sativa Japonica Group] dbj|BAF22270.1| Os07g0630400 [Oryza sativa Japonica Group] gb|EAZ40755.1| hypothetical protein OsJ_25228 [Oryza sativa Japonica Group] dbj|BAG96743.1| unnamed protein product [Oryza sativa Japonica Group] dbj|BAG87404.1| unnamed protein product [Oryza sativa Japonica Group]
isotig01819	isogroup00061	1548	emb|CAJ77498.1|	putative ribonuclease T2 precursor [Solanum tuberosum]
isotig01820	isogroup00061	1376	gb|AAB58718.1|	aleurone ribonuclease [Hordeum vulgare subsp. vulgare]
isotig01821	isogroup00061	1373	gb|AAB58718.1|	aleurone ribonuclease [Hordeum vulgare subsp. vulgare]
isotig01822	isogroup00061	1412	ref|NP_001060356.1|	Os07g0630400 [Oryza sativa Japonica Group] dbj|BAC20682.1| putative aleurone ribonuclease [Oryza sativa Japonica Group] dbj|BAF22270.1| Os07g0630400 [Oryza sativa Japonica Group] gb|EAZ40755.1| hypothetical protein OsJ_25228 [Oryza sativa Japonica Group] dbj|BAG96743.1| unnamed protein product [Oryza sativa Japonica Group] dbj|BAG87404.1| unnamed protein product [Oryza sativa Japonica Group]
isotig01823	isogroup00061	1376	gb|AAB58718.1|	aleurone ribonuclease [Hordeum vulgare subsp. vulgare]
isotig01824	isogroup00061	1373	gb|AAB58718.1|	aleurone ribonuclease [Hordeum vulgare subsp. vulgare]
isotig01825	isogroup00061	1415	ref|XP_002461071.1|	hypothetical protein SORBIDRAFT_02g040180 [Sorghum bicolor] gb|EER97592.1| hypothetical protein SORBIDRAFT_02g040180 [Sorghum bicolor]
isotig01826	isogroup00061	1411	ref|XP_002461071.1|	hypothetical protein SORBIDRAFT_02g040180 [Sorghum bicolor] gb|EER97592.1| hypothetical protein SORBIDRAFT_02g040180 [Sorghum bicolor]
isotig01827	isogroup00061	1415	ref|NP_001060356.1|	Os07g0630400 [Oryza sativa Japonica Group] dbj|BAC20682.1| putative aleurone ribonuclease [Oryza sativa Japonica Group] dbj|BAF22270.1| Os07g0630400 [Oryza sativa Japonica Group] gb|EAZ40755.1| hypothetical protein OsJ_25228 [Oryza sativa Japonica Group] dbj|BAG96743.1| unnamed protein product [Oryza sativa Japonica Group] dbj|BAG87404.1| unnamed protein product [Oryza sativa Japonica Group]
isotig01828	isogroup00061	1244	gb|AAB58718.1|	aleurone ribonuclease [Hordeum vulgare subsp. vulgare]
isotig01829	isogroup00061	1241	gb|AAB58718.1|	aleurone ribonuclease [Hordeum vulgare subsp. vulgare]
isotig01830	isogroup00061	1356	ref|XP_002461071.1|	hypothetical protein SORBIDRAFT_02g040180 [Sorghum bicolor] gb|EER97592.1| hypothetical protein SORBIDRAFT_02g040180 [Sorghum bicolor]
isotig01831	isogroup00061	1377	ref|NP_001060356.1|	Os07g0630400 [Oryza sativa Japonica Group] dbj|BAC20682.1| putative aleurone ribonuclease [Oryza sativa Japonica Group] dbj|BAF22270.1| Os07g0630400 [Oryza sativa Japonica Group] gb|EAZ40755.1| hypothetical protein OsJ_25228 [Oryza sativa Japonica Group] dbj|BAG96743.1| unnamed protein product [Oryza sativa Japonica Group] dbj|BAG87404.1| unnamed protein product [Oryza sativa Japonica Group]
isotig01832	isogroup00061	1374	ref|NP_001060356.1|	Os07g0630400 [Oryza sativa Japonica Group] dbj|BAC20682.1| putative aleurone ribonuclease [Oryza sativa Japonica Group] dbj|BAF22270.1| Os07g0630400 [Oryza sativa Japonica Group] gb|EAZ40755.1| hypothetical protein OsJ_25228 [Oryza sativa Japonica Group] dbj|BAG96743.1| unnamed protein product [Oryza sativa Japonica Group] dbj|BAG87404.1| unnamed protein product [Oryza sativa Japonica Group]
isotig01833	isogroup00061	1411	ref|NP_001060356.1|	Os07g0630400 [Oryza sativa Japonica Group] dbj|BAC20682.1| putative aleurone ribonuclease [Oryza sativa Japonica Group] dbj|BAF22270.1| Os07g0630400 [Oryza sativa Japonica Group] gb|EAZ40755.1| hypothetical protein OsJ_25228 [Oryza sativa Japonica Group] dbj|BAG96743.1| unnamed protein product [Oryza sativa Japonica Group] dbj|BAG87404.1| unnamed protein product [Oryza sativa Japonica Group]
isotig01834	isogroup00061	1241	gb|AAB58718.1|	aleurone ribonuclease [Hordeum vulgare subsp. vulgare]
isotig01835	isogroup00061	1238	gb|AAB58718.1|	aleurone ribonuclease [Hordeum vulgare subsp. vulgare]
isotig01836	isogroup00061	1244	gb|AAB58718.1|	aleurone ribonuclease [Hordeum vulgare subsp. vulgare]
isotig01837	isogroup00061	1241	gb|AAB58718.1|	aleurone ribonuclease [Hordeum vulgare subsp. vulgare]
isotig01838	isogroup00061	1356	ref|XP_002461070.1|	hypothetical protein SORBIDRAFT_02g040170 [Sorghum bicolor] gb|EER97591.1| hypothetical protein SORBIDRAFT_02g040170 [Sorghum bicolor]
isotig01839	isogroup00061	1377	ref|NP_001060356.1|	Os07g0630400 [Oryza sativa Japonica Group] dbj|BAC20682.1| putative aleurone ribonuclease [Oryza sativa Japonica Group] dbj|BAF22270.1| Os07g0630400 [Oryza sativa Japonica Group] gb|EAZ40755.1| hypothetical protein OsJ_25228 [Oryza sativa Japonica Group] dbj|BAG96743.1| unnamed protein product [Oryza sativa Japonica Group] dbj|BAG87404.1| unnamed protein product [Oryza sativa Japonica Group]
isotig01840	isogroup00061	1374	ref|NP_001060356.1|	Os07g0630400 [Oryza sativa Japonica Group] dbj|BAC20682.1| putative aleurone ribonuclease [Oryza sativa Japonica Group] dbj|BAF22270.1| Os07g0630400 [Oryza sativa Japonica Group] gb|EAZ40755.1| hypothetical protein OsJ_25228 [Oryza sativa Japonica Group] dbj|BAG96743.1| unnamed protein product [Oryza sativa Japonica Group] dbj|BAG87404.1| unnamed protein product [Oryza sativa Japonica Group]
isotig01841	isogroup00061	1241	gb|AAB58718.1|	aleurone ribonuclease [Hordeum vulgare subsp. vulgare]
isotig01842	isogroup00061	1238	gb|AAB58718.1|	aleurone ribonuclease [Hordeum vulgare subsp. vulgare]
isotig01843	isogroup00061	1244	gb|AAB58718.1|	aleurone ribonuclease [Hordeum vulgare subsp. vulgare]
isotig01844	isogroup00061	1241	gb|AAB58718.1|	aleurone ribonuclease [Hordeum vulgare subsp. vulgare]
isotig01845	isogroup00061	1240	gb|AAB58718.1|	aleurone ribonuclease [Hordeum vulgare subsp. vulgare]
isotig01846	isogroup00061	1237	gb|AAB58718.1|	aleurone ribonuclease [Hordeum vulgare subsp. vulgare]
isotig01847	isogroup00061	1244	gb|AAB58718.1|	aleurone ribonuclease [Hordeum vulgare subsp. vulgare]
isotig01848	isogroup00061	1241	gb|AAB58718.1|	aleurone ribonuclease [Hordeum vulgare subsp. vulgare]
isotig01849	isogroup00061	1185	ref|XP_002461071.1|	hypothetical protein SORBIDRAFT_02g040180 [Sorghum bicolor] gb|EER97592.1| hypothetical protein SORBIDRAFT_02g040180 [Sorghum bicolor]
isotig01850	isogroup00061	1182	ref|XP_002461071.1|	hypothetical protein SORBIDRAFT_02g040180 [Sorghum bicolor] gb|EER97592.1| hypothetical protein SORBIDRAFT_02g040180 [Sorghum bicolor]
isotig01851	isogroup00061	1240	gb|AAB58718.1|	aleurone ribonuclease [Hordeum vulgare subsp. vulgare]
isotig01852	isogroup00061	1237	gb|AAB58718.1|	aleurone ribonuclease [Hordeum vulgare subsp. vulgare]
[truncated: 47,569 more rows]
